# Supplementary material for: Atmospheric oxidation of new 'green' solvents part II: methyl pivalate and pinacolone
Source: Copernicus journal article supplement (doi:10.5194/egusphere-2023-282), 2023-02-23
Supplement: Supplementary file 1 [file Supplementary Info MPA PCO.xlsx]

## Sheet: Figure 2
OH Decay			Linear Fit, Pinacolone, 460 K
t (microsecond)	S		Concentration (10^14 molecule cm3)	B (s-1)	st deviation
80	77697.1		0	656.676	31.4696
100	91708.3		15.8	4165.85	169.417
120	75984.7		7.44	2584.63	121.477
140	63869.3		2.54	1207.01	90.0919
160	79961.1		2.54	1574.54	80.805
180	57445.5		5.79	2306.09	76.4183
200	44780.1		9.09	2701.08	154.955
220	55060.3		14.1	4006.6	167.442
240	48146.3		12.4	3179.19	189.109
260	41600.1		10.8	3455.74	194.079
280	31445.1		4.16	1983.26	135.896
300	52919.5		1.73	1300.29	56.7023
320	29362.9		9.09	2562.77	128.369
340	28264.5
360	29118.7
380	31995.3
400	19760.5
420	21595.1
440	29915.9
460	20862.1
480	19149.3
500	16272.7
520	17436.5
540	10829.7
560	11564.5
580	14133.3
600	10768.9
620	15357.3
640	15357.5
660	9118.1
680	8813.3
700	10586.9
720	9303.7
740	10709.1
760	6488.9
780	5695.1
800	8139.7
820	4839.1
840	5327.9
860	4227.7
880	5999.5
900	2883.5
920	3432.9
940	3739.1
960	4716.1
980	6368.1
1000	3433.1
1020	4593.9
1040	6490.5
1060	4717.3
1080	3861.1
1100	5144.7
1120	4472.1
1140	4655.9
1160	2638.9
1180	3676.9
1200	1417.3
1220	4411.5
1240	3067.5
1260	1966.9
1280	2454.9
1300	3616.5
1320	2701.1
1340	3555.7
1360	3677.1
1380	4351.1
1400	2211.5
1420	1661.1
1440	3006.3
1460	1661.5
1480	3187.7
1500	3005.1
1520	3677.7
1540	3616.3
1560	1233.7
1580	1782.9
1600	4349.7
1620	2333.3
1640	1967.7
1660	2150.3
1680	1477.5
1700	2272.9
1720	3434.1
1740	2638.9
1760	2639.3
1780	3311.3
1800	1599.3
1820	1600.9
1840	2639.3
1860	3494.3
1880	3434.1
1900	744.1
1920	3311.5
1940	2210.7
1960	1539.1
1980	3188.9
2000	2517.1
2020	3190.3
2040	2761.5
2060	3067.5
2080	3861.9
2100	2150.3
2120	2334.5
2140	2149.1
2160	2578.9
2180	1171.9
2200	1294.9

## Sheet: Figure 3-Ethanol
Figure 3 - Ethanol + OH
Dillon et al					Hess and Tully					Wallington and Kurylo					Carr et al.					Jimenez et al., 2003					SAR			This work
1000/T	T (K)	k (10-12 cm3 molecule-1 s-1)	error		1000/T	T (K)	k (10-12 cm3 molecule-1 s-1)	error		1000/T	T	k (10-12 cm3 molecule-1 s-1)	error		1000/T	T	k (10-12 cm3 molecule-1 s-1)	error		1000/T	T	k (10-12 cm3 molecule-1 s-1)	error		1000/T	k (10-12 cm3 molecule-1 s-1)		1000/T	T	k (10-12 cm3 molecule-1 s-1)	error
4.62963	216	3.38	0.14		3.41297	293	3.26	0.14		4.16667	240	2.75	0.14		3.3557	298	3.16	0.03		4.40529	227	2.8	0.23		4.69	3.311		--
4.4843	223	3.45	0.08		3.38983	295	3.32	0.16		3.37838	296	3.33	0.23		3.3557	298	2.93	0.03		4.11523	243	3.11	0.1		4.67	3.309		3.38983	295	3.12	0.11	2405y21	N2
4.42478	226	3.35	0.13		3.06279	326.5	3.33	0.14		2.85714	350	3.25	0.29		2.6455	378	3.12	0.05		3.84615	260	3.2	0.11		4.65	3.308		2.23714	447	4.48388	0.11	1802y22	N2
4.20168	238	3.4	0.09		2.63158	380	3.63	0.15		2.5	400	4.07	0.04		2.6455	378	3.15	0.11		3.663	273	3.24	0.08		4.63	3.306		2.89855	345	3.6668	0.11	2102y22	N2
4.1841	239	3.36	0.07		2.26757	441	3.94	0.16		2.27273	440	4.58	0.29		2	500	4.32	0.1		3.50877	285	3.2	0.1		4.61	3.305		--
4.11523	243	3.48	0.09		1.92123	520.5	4.65	0.19							2	500	4.06	0.24		3.3557	298	3.15	0.24		4.59	3.304		3.367	297	3.24092	0.2	0202y22	N2
4.04858	247	3.25	0.13		1.83824	544	4.78	0.23							--					3.3557	298	2.99	0.15		4.57	3.302		3.367	297	3.02584	0.23	0202y22	O2
3.96825	252	3.4	0.06		1.78253	561	4.74	0.22							3.3557	298	2.91	0.07		3.3557	298	3.07	0.12		4.55	3.301		2.45098	408	4.04898	0.14	2302y22	N2
3.34448	299	3.39	0.06		1.71821	582	4.74	0.22							3.3557	298	2.99	0.05		3.33333	300	3.15	0.04		4.52	3.3		--
3.80228	263	3.46	0.07		1.67224	598	4.65	0.21							2.6455	378	3.25	0.07		3.1746	315	3.27	0.1		4.5	3.299		--
3.7037	270	3.33	0.1		1.66945	599	5.47	0.34							2.6455	378	3.02	0.09		3.0303	330	3.39	0.06		4.48	3.297		--
3.663	273	3.35	0.07		1.6116	620.5	4.79	0.22							2.6455	378	3.31	0.07		3.0303	330	3	0.11		4.46	3.296		--
3.58423	279	3.23	0.12		1.55039	645	5.06	0.23							2.00803	498	4.37	0.15		2.89855	345	3.37	0.22		4.44	3.295		--
2.75482	363	3.84	0.09		1.4771	677	5.66	0.3							2.00803	498	4.1	0.08		2.77778	360	3.6	0.11		4.42	3.294		--
3.37838	296	3.34	0.1		1.41643	706	6.12	0.35							--										4.41	3.293		--
2.71739	368	3.83	0.08		1.33422	749.5	6.62	0.37							--										4.39	3.292		--
3.3557	298	3.26	0.08												--										4.37	3.291		--
3.3557	298	3.25	0.12												--										4.35	3.29		--
3.3557	298	3.25	0.1												--										4.33	3.289		--
3.3557	298	3.26	0.09												--										4.31	3.288		--
3.3557	298	3.39	0.07												--										4.29	3.287		--
3.3557	298	3.57	0.1												--										4.27	3.286		--
3.34448	299	3.34	0.1												--										4.26	3.285		--
3.34448	299	3.7	0.08												--										4.24	3.284		--
3.87597	258	3.38	0.11												--										4.22	3.283		--
3.1348	319	3.61	0.09												--										4.2	3.282		--
2.94985	339	3.72	0.09												--										4.18	3.281		--
2.83286	353	3.57	0.07												--										4.17	3.281		--
2.7933	358	3.47	0.13												--										4.15	3.28		--
3.52113	284	3.46	0.09									--	--	--	--									--	4.13	3.279		--	--	--	--	--	--
2.75482	363	3.5	0.09									--	--	--	--									--	4.12	3.278		--	--	--	--	--	--
--												--	--	--	--									--	4.1	3.277		--	--	--	--	--	--
												--	--	--	--									--	4.08	3.277		--	--	--	--	--	--
									--	--	--	--	--	--	--									--	4.07	3.276		--	--	--	--	--	--
									--	--	--	--	--	--	--									--	4.05	3.275		--	--	--	--	--	--
									--	--	--	--	--	--	--									--	4.03	3.275		--	--	--	--	--	--
									--	--	--	--	--	--	--									--	4.02	3.274		--	--	--	--	--	--
									--	--	--	--	--	--	--									--	4	3.273		--	--	--	--	--	--
									--	--	--	--	--	--	--									--	3.98	3.273		--	--	--	--	--	--
									--	--	--	--	--	--	--									--	3.97	3.272		--	--	--	--	--	--
									--	--	--	--	--	--	--									--	3.95	3.271		--	--	--	--	--	--
									--	--	--	--	--	--	--									--	3.94	3.271		--	--	--	--	--	--
									--	--	--	--	--	--	--									--	3.92	3.27		--	--	--	--	--	--
									--	--	--	--	--	--	--									--	3.91	3.27		--	--	--	--	--	--
									--	--	--	--	--	--	--									--	3.89	3.269		--	--	--	--	--	--
									--	--	--	--	--	--	--									--	3.88	3.269		--	--	--	--	--	--
									--	--	--	--	--	--	--									--	3.86	3.268		--	--	--	--	--	--
									--	--	--	--	--	--	--									--	3.85	3.268		--	--	--	--	--	--
									--	--	--	--	--	--	--									--	3.83	3.267		--	--	--	--	--	--
									--	--	--	--	--	--	--									--	3.82	3.267		--	--	--	--	--	--
									--	--	--	--	--	--	--									--	3.8	3.266		--	--	--	--	--	--
									--	--	--	--	--	--	--									--	3.79	3.266		--	--	--	--	--	--
									--	--	--	--	--	--	--									--	3.77	3.265		--	--	--	--	--	--
									--	--	--	--	--	--	--									--	3.76	3.265		--	--	--	--	--	--
									--	--	--	--	--	--	--									--	3.75	3.264		--	--	--	--	--	--
									--	--	--	--	--	--	--									--	3.73	3.264		--	--	--	--	--	--
									--	--	--	--	--	--	--									--	3.72	3.264		--	--	--	--	--	--
									--	--	--	--	--	--	--									--	3.7	3.263		--	--	--	--	--	--
									--	--	--	--	--	--	--									--	3.69	3.263		--	--	--	--	--	--
		--	--						--	--	--	--	--	--	--									--	3.68	3.263		--	--	--	--	--	--
		--	--	--	--	--	--	--	--	--	--	--	--	--	--									--	3.66	3.262		--	--	--	--	--	--
		--	--	--	--	--	--	--	--	--	--	--	--	--	--									--	3.65	3.262		--	--	--	--	--	--
															--										3.64	3.262		--
		--	--	--	--	--	--	--	--		--	--	--	--	--									--	3.62	3.261		--	--	--	--	--	--
																									3.61	3.261
																									3.6	3.261
																									3.58	3.26
																									3.57	3.26
																									3.56	3.26
																									3.55	3.26
																									3.53	3.26
																									3.52	3.259
																									3.51	3.259
																									3.5	3.259
																									3.48	3.259
																									3.47	3.259
																									3.46	3.258
																									3.45	3.258
																									3.44	3.258
																									3.42	3.258
																									3.41	3.258
																									3.4	3.258
																									3.39	3.258
																									3.38	3.258
																									3.37	3.258
																									3.36	3.257
																									3.34	3.257
																									3.33	3.257

## Sheet: Figure 3 - PCO
Figure 3 - PCO + OH
This work						Wallington et al., 1987							SAR PCO
1000/T	T (K)	k (10-12 cm3 molecule-1 s-1)	error			1000/T	T (K)	k (10-12 cm3 molecule-1 s-1)	error				T (K)	Calfa	C beta	k(10-12 cm3 molecule-1 s-1)	k (cm3 molecule-1 s-1)
3.3557	298	1.33	0.06002			3.37838	296	1.21	0.05				253	0.09233	1.82394	1.91626	1.92e-12
2.91545	343	1.63444	0.14936										254	0.09316	1.80881	1.90197	1.9e-12
2.91545	343	1.51809	0.14649										255	0.09399	1.79393	1.88792	1.89e-12
2.68817	372	1.76	0.09068										256	0.09482	1.77929	1.87411	1.87e-12
2.5	400	1.82	0.13867										257	0.09565	1.76488	1.86053	1.86e-12
2.17391	460	2.4	0.10659										258	0.09648	1.7507	1.84718	1.85e-12
2.06186	485	2.75	0.13586										259	0.09732	1.73674	1.83406	1.83e-12
2.93255	341	1.39754	0.1152										260	0.09815	1.723	1.82115	1.82e-12
2.1645	462	2.32638	0.12762										261	0.09899	1.70947	1.80845	1.81e-12
2.35849	424	1.59	0.05879										262	0.09982	1.69614	1.79597	1.8e-12
2.35849	424	1.8	0.04879										263	0.10066	1.68302	1.78368	1.78e-12
3.367	297	1.31	0.06										264	0.1015	1.67011	1.7716	1.77e-12
3.367	297	1.06	0.06										265	0.10233	1.65738	1.75972	1.76e-12
													266	0.10317	1.64485	1.74802	1.75e-12
													267	0.10401	1.63251	1.73652	1.74e-12
													268	0.10485	1.62035	1.7252	1.73e-12
													269	0.10569	1.60837	1.71406	1.71e-12
													270	0.10653	1.59656	1.70309	1.7e-12
													271	0.10737	1.58493	1.6923	1.69e-12
													272	0.10821	1.57347	1.68168	1.68e-12
													273	0.10905	1.56218	1.67123	1.67e-12
													274	0.10989	1.55104	1.66094	1.66e-12
													275	0.11074	1.54007	1.6508	1.65e-12
													276	0.11158	1.52925	1.64083	1.64e-12
													277	0.11242	1.51859	1.63101	1.63e-12
													278	0.11326	1.50807	1.62134	1.62e-12
													279	0.11411	1.49771	1.61181	1.61e-12
													280	0.11495	1.48748	1.60243	1.6e-12
													281	0.11579	1.4774	1.5932	1.59e-12
													282	0.11663	1.46746	1.5841	1.58e-12
													283	0.11748	1.45766	1.57514	1.58e-12
													284	0.11832	1.44799	1.56631	1.57e-12
													285	0.11916	1.43845	1.55761	1.56e-12
													286	0.12001	1.42904	1.54905	1.55e-12
													287	0.12085	1.41975	1.54061	1.54e-12
													288	0.1217	1.41059	1.53229	1.53e-12
													289	0.12254	1.40156	1.5241	1.52e-12
													290	0.12338	1.39264	1.51602	1.52e-12
													291	0.12423	1.38384	1.50806	1.51e-12
													292	0.12507	1.37515	1.50022	1.5e-12
													293	0.12591	1.36658	1.49249	1.49e-12
													294	0.12676	1.35812	1.48487	1.48e-12
													295	0.1276	1.34977	1.47737	1.48e-12
													296	0.12844	1.34152	1.46996	1.47e-12
													297	0.12929	1.33338	1.46267	1.46e-12
													298	0.13013	1.32535	1.45548	1.46e-12
													299	0.13097	1.31741	1.44838	1.45e-12
													300	0.13181	1.30958	1.44139	1.44e-12
													301	0.13266	1.30184	1.4345	1.43e-12
													302	0.1335	1.2942	1.4277	1.43e-12
													303	0.13434	1.28666	1.421	1.42e-12
													304	0.13518	1.27921	1.41439	1.41e-12
													305	0.13602	1.27185	1.40787	1.41e-12
													306	0.13686	1.26458	1.40144	1.4e-12
													307	0.1377	1.2574	1.3951	1.4e-12
													308	0.13854	1.2503	1.38884	1.39e-12
													309	0.13938	1.24329	1.38267	1.38e-12
													310	0.14022	1.23637	1.37659	1.38e-12
													311	0.14106	1.22953	1.37059	1.37e-12
													312	0.1419	1.22277	1.36466	1.36e-12
													313	0.14274	1.21609	1.35882	1.36e-12
													314	0.14357	1.20948	1.35306	1.35e-12
													315	0.14441	1.20296	1.34737	1.35e-12
													316	0.14525	1.19651	1.34176	1.34e-12
													317	0.14608	1.19014	1.33622	1.34e-12
													318	0.14692	1.18384	1.33076	1.33e-12
													319	0.14775	1.17761	1.32536	1.33e-12
													320	0.14859	1.17146	1.32004	1.32e-12
													321	0.14942	1.16537	1.31479	1.31e-12
													322	0.15026	1.15935	1.30961	1.31e-12
													323	0.15109	1.15341	1.30449	1.3e-12
													324	0.15192	1.14752	1.29945	1.3e-12
													325	0.15275	1.14171	1.29446	1.29e-12
													326	0.15358	1.13596	1.28954	1.29e-12
													327	0.15441	1.13027	1.28469	1.28e-12
													328	0.15524	1.12465	1.27989	1.28e-12
													329	0.15607	1.11909	1.27516	1.28e-12
													330	0.1569	1.11358	1.27049	1.27e-12
													331	0.15773	1.10814	1.26587	1.27e-12
													332	0.15856	1.10276	1.26132	1.26e-12
													333	0.15939	1.09744	1.25682	1.26e-12
													334	0.16021	1.09217	1.25238	1.25e-12
													335	0.16104	1.08696	1.248	1.25e-12
													336	0.16186	1.08181	1.24367	1.24e-12
													337	0.16269	1.07671	1.23939	1.24e-12
													338	0.16351	1.07166	1.23517	1.24e-12
													339	0.16433	1.06667	1.231	1.23e-12
													340	0.16515	1.06173	1.22689	1.23e-12
													341	0.16597	1.05684	1.22282	1.22e-12
													342	0.16679	1.05201	1.2188	1.22e-12
													343	0.16761	1.04722	1.21483	1.21e-12
													344	0.16843	1.04248	1.21092	1.21e-12
													345	0.16925	1.03779	1.20704	1.21e-12
													346	0.17007	1.03315	1.20322	1.2e-12
													347	0.17089	1.02856	1.19944	1.2e-12
													348	0.1717	1.02401	1.19571	1.2e-12
													349	0.17252	1.01951	1.19203	1.19e-12
													350	0.17333	1.01506	1.18839	1.19e-12
													351	0.17414	1.01064	1.18479	1.18e-12
													352	0.17496	1.00628	1.18123	1.18e-12
													353	0.17577	1.00195	1.17772	1.18e-12
													354	0.17658	0.99767	1.17425	1.17e-12
													355	0.17739	0.99344	1.17082	1.17e-12
													356	0.1782	0.98924	1.16744	1.17e-12
													357	0.179	0.98508	1.16409	1.16e-12
													358	0.17981	0.98097	1.16078	1.16e-12
													359	0.18062	0.97689	1.15751	1.16e-12
													360	0.18142	0.97286	1.15428	1.15e-12
													361	0.18223	0.96886	1.15109	1.15e-12
													362	0.18303	0.9649	1.14793	1.15e-12
													363	0.18383	0.96098	1.14482	1.14e-12
													364	0.18464	0.9571	1.14173	1.14e-12
													365	0.18544	0.95325	1.13869	1.14e-12
													366	0.18624	0.94944	1.13568	1.14e-12
													367	0.18703	0.94567	1.1327	1.13e-12
													368	0.18783	0.94193	1.12976	1.13e-12
													369	0.18863	0.93823	1.12686	1.13e-12
													370	0.18943	0.93456	1.12398	1.12e-12
													371	0.19022	0.93092	1.12114	1.12e-12
													372	0.19102	0.92732	1.11834	1.12e-12

## Sheet: Figure 4 - MPA
Figure 4 - MPA + OH
This work					Wallington et al., 1987						SAR MPA
1000/T	T (K)	k (10-12 cm3 molecule-1 s-1)	error		T (K)	1000/T	k (10-12 cm3 molecule-1 s-1)	error			T (K)	C ester	Cbeta	k(10-12 cm3 molecule-1 s-1)	k (cm3 molecule-1 s-1)
3.367	297	1.29	0.04247		250	4	1.37e-12	3e-14			253	0.47588	1.43217	1.90806	1.91e-12
3.367	297	1.34	0.06098		272	3.67647	1.24e-12	2e-14			254	0.47533	1.42074	1.89607	1.9e-12
3.367	297	1.29	0.02939		298	3.3557	1.2e-12	3e-14			255	0.47478	1.40949	1.88427	1.88e-12
2.68817	372	1.6	0.06288		330	3.0303	1.22e-12	2e-14			256	0.47423	1.39841	1.87265	1.87e-12
2.5	400	1.72	0.0989		370	2.7027	1.38e-12	3e-14			257	0.47369	1.38751	1.8612	1.86e-12
2.35849	424	1.47	0.05399								258	0.47316	1.37678	1.84993	1.85e-12
2.35849	424	1.63	0.06397								259	0.47263	1.36621	1.83883	1.84e-12
2.06186	485	2.32	0.139								260	0.4721	1.3558	1.8279	1.83e-12
2.94118	340	1.14811	0.0873								261	0.47158	1.34555	1.81713	1.82e-12
2.17391	460	2.13067	0.16905								262	0.47106	1.33545	1.80651	1.81e-12
3.38983	295	1.35456	0.12507								263	0.47055	1.32551	1.79606	1.8e-12
4	250	1.37	0.03								264	0.47004	1.31571	1.78575	1.79e-12
3.67647	272	1.24	0.02								265	0.46954	1.30606	1.7756	1.78e-12
3.3557	298	1.2	0.03								266	0.46904	1.29656	1.76559	1.77e-12
3.0303	330	1.22	0.02								267	0.46854	1.28719	1.75573	1.76e-12
2.7027	370	1.38	0.03								268	0.46805	1.27796	1.74601	1.75e-12
											269	0.46757	1.26886	1.73643	1.74e-12
											270	0.46708	1.25989	1.72698	1.73e-12
											271	0.46661	1.25106	1.71766	1.72e-12
											272	0.46613	1.24235	1.70848	1.71e-12
											273	0.46566	1.23376	1.69942	1.7e-12
											274	0.46519	1.2253	1.69049	1.69e-12
											275	0.46473	1.21695	1.68168	1.68e-12
											276	0.46427	1.20872	1.67299	1.67e-12
											277	0.46382	1.20061	1.66442	1.66e-12
											278	0.46337	1.1926	1.65597	1.66e-12
											279	0.46292	1.18471	1.64763	1.65e-12
											280	0.46247	1.17693	1.6394	1.64e-12
											281	0.46203	1.16925	1.63128	1.63e-12
											282	0.4616	1.16167	1.62327	1.62e-12
											283	0.46116	1.1542	1.61536	1.62e-12
											284	0.46073	1.14683	1.60756	1.61e-12
											285	0.46031	1.13956	1.59986	1.6e-12
											286	0.45988	1.13238	1.59226	1.59e-12
											287	0.45946	1.1253	1.58476	1.58e-12
											288	0.45905	1.11831	1.57735	1.58e-12
											289	0.45863	1.11141	1.57004	1.57e-12
											290	0.45822	1.1046	1.56282	1.56e-12
											291	0.45781	1.09788	1.55569	1.56e-12
											292	0.45741	1.09125	1.54866	1.55e-12
											293	0.45701	1.0847	1.54171	1.54e-12
											294	0.45661	1.07823	1.53484	1.53e-12
											295	0.45622	1.07185	1.52806	1.53e-12
											296	0.45583	1.06554	1.52137	1.52e-12
											297	0.45544	1.05932	1.51476	1.51e-12
											298	0.45505	1.05317	1.50823	1.51e-12
											299	0.45467	1.0471	1.50177	1.5e-12
											300	0.45429	1.04111	1.4954	1.5e-12
											301	0.45391	1.03519	1.4891	1.49e-12
											302	0.45354	1.02934	1.48288	1.48e-12
											303	0.45317	1.02356	1.47673	1.48e-12
											304	0.4528	1.01786	1.47065	1.47e-12
											305	0.45243	1.01222	1.46465	1.46e-12
											306	0.45207	1.00665	1.45872	1.46e-12
											307	0.45171	1.00115	1.45285	1.45e-12
											308	0.45135	0.99571	1.44706	1.45e-12
											309	0.45099	0.99033	1.44133	1.44e-12
											310	0.45064	0.98502	1.43566	1.44e-12
											311	0.45029	0.97978	1.43007	1.43e-12
											312	0.44994	0.97459	1.42453	1.42e-12
											313	0.4496	0.96946	1.41906	1.42e-12
											314	0.44925	0.9644	1.41365	1.41e-12
											315	0.44891	0.95939	1.4083	1.41e-12
											316	0.44857	0.95444	1.40301	1.4e-12
											317	0.44824	0.94954	1.39778	1.4e-12
											318	0.4479	0.94471	1.39261	1.39e-12
											319	0.44757	0.93992	1.3875	1.39e-12
											320	0.44725	0.93519	1.38244	1.38e-12
											321	0.44692	0.93051	1.37743	1.38e-12
											322	0.44659	0.92589	1.37248	1.37e-12
											323	0.44627	0.92132	1.36759	1.37e-12
											324	0.44595	0.91679	1.36275	1.36e-12
											325	0.44564	0.91232	1.35796	1.36e-12
											326	0.44532	0.9079	1.35322	1.35e-12
											327	0.44501	0.90352	1.34853	1.35e-12
											328	0.4447	0.89919	1.34389	1.34e-12
											329	0.44439	0.89491	1.3393	1.34e-12
											330	0.44408	0.89068	1.33476	1.33e-12
											331	0.44378	0.88649	1.33026	1.33e-12
											332	0.44347	0.88234	1.32582	1.33e-12
											333	0.44317	0.87824	1.32141	1.32e-12
											334	0.44287	0.87419	1.31706	1.32e-12
											335	0.44258	0.87017	1.31275	1.31e-12
											336	0.44228	0.8662	1.30848	1.31e-12
											337	0.44199	0.86227	1.30426	1.3e-12
											338	0.4417	0.85838	1.30008	1.3e-12
											339	0.44141	0.85453	1.29594	1.3e-12
											340	0.44112	0.85072	1.29184	1.29e-12
											341	0.44084	0.84695	1.28778	1.29e-12
											342	0.44055	0.84322	1.28377	1.28e-12
											343	0.44027	0.83952	1.27979	1.28e-12
											344	0.43999	0.83587	1.27586	1.28e-12
											345	0.43971	0.83225	1.27196	1.27e-12
											346	0.43944	0.82866	1.2681	1.27e-12
											347	0.43916	0.82512	1.26428	1.26e-12
											348	0.43889	0.82161	1.2605	1.26e-12
											349	0.43862	0.81813	1.25675	1.26e-12
											350	0.43835	0.81469	1.25304	1.25e-12
											351	0.43808	0.81128	1.24936	1.25e-12
											352	0.43782	0.8079	1.24572	1.25e-12
											353	0.43755	0.80456	1.24212	1.24e-12
											354	0.43729	0.80125	1.23854	1.24e-12
											355	0.43703	0.79798	1.23501	1.24e-12
											356	0.43677	0.79473	1.2315	1.23e-12
											357	0.43651	0.79152	1.22803	1.23e-12
											358	0.43626	0.78834	1.22459	1.22e-12
											359	0.436	0.78518	1.22118	1.22e-12
											360	0.43575	0.78206	1.21781	1.22e-12
											361	0.4355	0.77897	1.21446	1.21e-12
											362	0.43525	0.7759	1.21115	1.21e-12
											363	0.435	0.77287	1.20787	1.21e-12
											364	0.43475	0.76986	1.20461	1.2e-12
											365	0.43451	0.76688	1.20139	1.2e-12
											366	0.43426	0.76393	1.1982	1.2e-12
											367	0.43402	0.76101	1.19503	1.2e-12
											368	0.43378	0.75811	1.19189	1.19e-12
											369	0.43354	0.75524	1.18878	1.19e-12
											370	0.4333	0.7524	1.1857	1.19e-12
											371	0.43307	0.74958	1.18265	1.18e-12
											372	0.43283	0.74679	1.17962	1.18e-12

## Sheet: Figure 5
Figure 5: Spectra of MEK (black line) and PCO (blue double line) in cyclohexane together with the IUPAC-recommended gas-phase spectrum of MEK (red dashed line) recorded by Martinez et al. (1992)
Sigma PCO			Sigma MEK, This work			Sigma MEK, Martinez et al., 1992			MEK, Theory (gas)			MEK, Theory (sol)			PCO, Theory (gas)			PCO, Theory (sol)
Wavelength (nm)	Sigma (cm2 molecule-1		Wavelength (nm)	Sigma (cm2 molecule-1		Wavelength (nm)	Sigma (cm2 molecule-1)		Wavelength (nm)	Sigma (cm2 molecule-1)		Wavelength (nm)	Sigma (cm2 molecule-1)		Wavelength (nm)	Sigma (cm2 molecule-1)		Wavelength (nm)	Sigma (cm2 molecule-1)
200	1.37591e-19		200	3.56608e-21		202	1.412e-20		232	5.77261e-22		232	7.24601e-22		236.95	7.63e-22		236.37	9.58e-22
201	1.86383e-19		201	2.88989e-21		206	1.92e-21		232.309	5.99526e-22		232.301	7.55865e-22		237.18	7.81e-22		236.59	9.8e-22
202	1.47713e-19		202	1.26383e-21		210	1.6e-21		232.619	6.23911e-22		232.602	7.89592e-22		237.41	7.99e-22		236.82	1.003e-21
203	1.38546e-19		203	-4.18592e-21		214	1.83e-21		232.928	6.50857e-22		232.903	8.27602e-22		237.64	8.18e-22		237.05	1.027e-21
204	1.5115e-19		204	-2.4713e-21		218	2.25e-21		233.238	6.79959e-22		233.203	8.72336e-22		237.86	8.39e-22		237.27	1.052e-21
205	1.48381e-19		205	3.53388e-21		222	2.9e-21		233.547	7.12691e-22		233.504	9.23782e-22		238.09	8.6e-22		237.5	1.079e-21
206	1.51245e-19		206	3.09919e-21		226	3.91e-21		233.857	7.50448e-22		233.805	9.82821e-22		238.32	8.82e-22		237.73	1.107e-21
207	1.65568e-19		207	-1.20748e-22		230	5.34e-21		234.166	7.93352e-22		234.106	1.05307e-21		238.55	9.06e-22		237.96	1.136e-21
208	1.74734e-19		208	2.4552e-21		234	7.42e-21		234.476	8.43594e-22		234.407	1.1403e-21		238.78	9.31e-22		238.18	1.167e-21
209	1.71679e-19		209	3.55803e-21		238	1.029e-20		234.785	9.03192e-22		234.708	1.25231e-21		239.01	9.58e-22		238.41	1.2e-21
210	1.77599e-19		210	1.40872e-21		242	1.41e-20		235.095	9.74893e-22		235.009	1.39617e-21		239.24	9.87e-22		238.64	1.235e-21
211	1.92017e-19		211	4.10542e-22		246	1.886e-20		235.404	1.06697e-21		235.309	1.57372e-21		239.47	1.017e-21		238.87	1.273e-21
212	2.03284e-19		212	7.88885e-22		250	2.45e-20		235.713	1.18227e-21		235.61	1.80905e-21		239.7	1.05e-21		239.1	1.314e-21
213	1.97555e-19		213	7.40586e-22		254	3.09e-20		236.023	1.33304e-21		235.911	2.0822e-21		239.94	1.086e-21		239.33	1.357e-21
214	2.12259e-19		214	3.24409e-21		258	3.74e-20		236.332	1.5234e-21		236.212	2.36017e-21		240.17	1.124e-21		239.56	1.405e-21
215	2.21999e-19		215	2.81745e-21		262	4.39e-20		236.642	1.74753e-21		236.513	2.52307e-21		240.4	1.166e-21		239.8	1.457e-21
216	2.3804e-19		216	1.60997e-22		266	4.96e-20		236.951	1.97086e-21		236.814	2.55441e-21		240.63	1.212e-21		240.03	1.514e-21
217	2.27441e-19		217	1.11088e-21		270	5.4e-20		237.261	2.13529e-21		237.115	2.49518e-21		240.87	1.263e-21		240.26	1.577e-21
218	2.49211e-19		218	1.85146e-21		274	5.68e-20		237.57	2.20199e-21		237.415	2.43443e-21		241.1	1.32e-21		240.49	1.647e-21
219	2.51789e-19		219	2.27811e-21		278	5.77e-20		237.88	2.18911e-21		237.716	2.41647e-21		241.34	1.385e-21		240.73	1.727e-21
220	2.56659e-19		220	2.51155e-21		280	5.74e-20		238.189	2.16611e-21		238.017	2.43111e-21		241.57	1.458e-21		240.96	1.818e-21
221	2.63534e-19		221	2.49545e-21		281	5.72e-20		238.499	2.17614e-21		238.318	2.45356e-21		241.81	1.542e-21		241.2	1.924e-21
222	2.54272e-19		222	2.05271e-21		282	5.68e-20		238.808	2.2405e-21		238.619	2.47529e-21		242.04	1.64e-21		241.43	2.047e-21
223	2.77092e-19		223	3.13944e-21		283	5.62e-20		239.117	2.3311e-21		238.92	2.50196e-21		242.28	1.756e-21		241.67	2.193e-21
224	2.7671e-19		224	2.26201e-21		284	5.54e-20		239.427	2.42546e-21		239.221	2.54771e-21		242.52	1.893e-21		241.9	2.367e-21
225	2.73464e-19		225	2.36665e-21		285	5.44e-20		239.736	2.52425e-21		239.521	2.63373e-21		242.75	2.057e-21		242.14	2.573e-21
226	2.94088e-19		226	2.4069e-21		286	5.35e-20		240.046	2.64146e-21		239.822	2.77228e-21		242.99	2.252e-21		242.37	2.812e-21
227	2.84063e-19		227	3.75928e-21		287	5.26e-20		240.355	2.8043e-21		240.123	2.95938e-21		243.23	2.478e-21		242.61	3.075e-21
228	2.78238e-19		228	4.02492e-21		288	5.17e-20		240.665	3.04943e-21		240.424	3.16012e-21		243.47	2.727e-21		242.85	3.336e-21
229	2.76806e-19		229	4.77356e-21		289	5.06e-20		240.974	3.38809e-21		240.725	3.35951e-21		243.71	2.981e-21		243.09	3.551e-21
230	2.68117e-19		230	4.67696e-21		290	4.94e-20		241.284	3.8045e-21		241.026	3.56261e-21		243.95	3.215e-21		243.33	3.68e-21
231	2.5876e-19		231	5.0392e-21		291	4.78e-20		241.593	4.23781e-21		241.327	3.84328e-21		244.19	3.405e-21		243.56	3.72e-21
232	2.51694e-19		232	5.72344e-21		292	4.6e-20		241.903	4.56654e-21		241.628	4.23991e-21		244.43	3.538e-21		243.8	3.71e-21
233	2.30306e-19		233	6.66527e-21		293	4.42e-20		242.212	4.7629e-21		241.928	4.77159e-21		244.67	3.601e-21		244.04	3.701e-21
234	2.32024e-19		234	6.67332e-21		294	4.24e-20		242.521	4.9019e-21		242.229	5.42609e-21		244.91	3.594e-21		244.28	3.732e-21
235	2.29637e-19		235	6.88262e-21		295	4.08e-20		242.831	5.08203e-21		242.53	6.07233e-21		245.15	3.547e-21		244.53	3.823e-21
236	2.17893e-19		236	8.09009e-21		296	3.93e-20		243.14	5.3223e-21		242.831	6.61751e-21		245.4	3.501e-21		244.77	3.986e-21
237	2.0844e-19		237	8.58918e-21		297	3.79e-20		243.45	5.53777e-21		243.132	7.00728e-21		245.64	3.492e-21		245.01	4.227e-21
238	1.84569e-19		238	9.98986e-21		298	3.65e-20		243.759	5.60321e-21		243.433	7.17507e-21		245.88	3.536e-21		245.25	4.552e-21
239	1.53919e-19		239	1.0497e-20		299	3.48e-20		244.069	5.50232e-21		243.734	7.15172e-21		246.13	3.641e-21		245.49	4.961e-21
240	1.23555e-19		240	1.15837e-20		300	3.3e-20		244.378	5.32476e-21		244.034	7.06021e-21		246.37	3.806e-21		245.74	5.443e-21
241	9.55787e-20		241	1.27349e-20		301	3.1e-20		244.688	5.22752e-21		244.335	7.02516e-21		246.62	4.034e-21		245.98	5.97e-21
242	7.55272e-20		242	1.29361e-20		302	2.89e-20		244.997	5.30157e-21		244.636	7.10972e-21		246.86	4.336e-21		246.23	6.502e-21
243	6.14912e-20		243	1.51257e-20		303	2.69e-20		245.307	5.58787e-21		244.937	7.30022e-21		247.11	4.721e-21		246.47	7.005e-21
244	5.10835e-20		244	1.53672e-20		304	2.5e-20		245.616	6.10474e-21		245.238	7.59115e-21		247.35	5.198e-21		246.72	7.47e-21
245	4.35404e-20		245	1.71784e-20		305	2.33e-20		245.925	6.84681e-21		245.539	8.00057e-21		247.6	5.76e-21		246.96	7.909e-21
246	3.9721e-20		246	1.77177e-20		306	2.17e-20		246.235	7.6781e-21		245.84	8.52778e-21		247.85	6.376e-21		247.21	8.35e-21
247	3.82888e-20		247	1.94323e-20		307	2.02e-20		246.544	8.47008e-21		246.14	9.23112e-21		248.1	7.001e-21		247.45	8.806e-21
248	3.6761e-20		248	2.1002e-20		308	1.876e-20		246.854	8.96408e-21		246.441	1.00471e-20		248.35	7.591e-21		247.7	9.265e-21
249	3.59972e-20		249	2.14287e-20		309	1.727e-20		247.163	9.14003e-21		246.742	1.08943e-20		248.59	8.13e-21		247.95	9.666e-21
250	3.62836e-20		250	2.40932e-20		310	1.575e-20		247.473	9.14253e-21		247.043	1.15936e-20		248.84	8.623e-21		248.2	9.927e-21
251	3.65701e-20		251	2.55261e-20		311	1.423e-20		247.782	9.17246e-21		247.344	1.20571e-20		249.09	9.067e-21		248.45	1.0015e-20
252	3.61881e-20		252	2.76432e-20		312	1.276e-20		248.092	9.41644e-21		247.645	1.24227e-20		249.34	9.46e-21		248.69	9.995e-21
253	3.6952e-20		253	2.93014e-20		313	1.136e-20		248.401	9.85602e-21		247.946	1.28156e-20		249.6	9.823e-21		248.94	9.987e-21
254	3.82888e-20		254	3.12736e-20		314	1.009e-20		248.711	1.04237e-20		248.246	1.33081e-20		249.85	1.0181e-20		249.19	1.0084e-20
255	3.83843e-20		255	3.29883e-20		315	8.96e-21		249.02	1.10317e-20		248.547	1.39021e-20		250.1	1.0518e-20		249.45	1.0319e-20
256	3.9912e-20		256	3.42601e-20		316	7.94e-21		249.33	1.16362e-20		248.848	1.46156e-20		250.35	1.0786e-20		249.7	1.0683e-20
257	4.05804e-20		257	3.63289e-20		317	6.97e-21		249.639	1.22529e-20		249.149	1.54395e-20		250.6	1.0974e-20		249.95	1.1169e-20
258	4.11533e-20		258	3.78745e-20		318	6.11e-21		249.948	1.289e-20		249.45	1.63675e-20		250.86	1.1138e-20		250.2	1.1809e-20
259	4.40178e-20		259	4.02412e-20		319	5.31e-21		250.258	1.35036e-20		249.751	1.73168e-20		251.11	1.1355e-20		250.45	1.2664e-20
260	4.45907e-20		260	4.27205e-20		320	4.57e-21		250.567	1.40844e-20		250.052	1.81237e-20		251.37	1.1643e-20		250.71	1.3771e-20
261	4.62139e-20		261	4.29218e-20		321	3.89e-21		250.877	1.45837e-20		250.352	1.87325e-20		251.62	1.196e-20		250.96	1.5084e-20
262	4.76461e-20		262	4.5224e-20		322	3.28e-21		251.186	1.49999e-20		250.653	1.92311e-20		251.88	1.226e-20		251.21	1.6451e-20
263	4.93648e-20		263	4.63269e-20		323	2.76e-21		251.496	1.53657e-20		250.954	1.97073e-20		252.13	1.2557e-20		251.47	1.7667e-20
264	5.0988e-20		264	4.89189e-20		324	2.29e-21		251.805	1.57323e-20		251.255	2.02347e-20		252.39	1.2905e-20		251.72	1.8581e-20
265	5.30887e-20		265	5.03035e-20		325	1.89e-21		252.115	1.61133e-20		251.556	2.09087e-20		252.65	1.3342e-20		251.98	1.9164e-20
266	5.32796e-20		266	5.11487e-20		326	1.56e-21		252.424	1.65433e-20		251.857	2.17221e-20		252.91	1.3845e-20		252.24	1.9467e-20
267	5.64306e-20		267	5.32095e-20		327	1.29e-21		252.734	1.70934e-20		252.158	2.26013e-20		253.16	1.4345e-20		252.49	1.9556e-20
268	5.74809e-20		268	5.48919e-20		328	1.05e-21		253.043	1.78963e-20		252.458	2.34308e-20		253.42	1.4779e-20		252.75	1.9495e-20
269	6.01544e-20		269	5.55198e-20		329	8.5e-22		253.352	1.9033e-20		252.759	2.4261e-20		253.68	1.513e-20		253.01	1.9364e-20
270	6.21596e-20		270	5.70573e-20		330	6.7e-22		253.662	2.03457e-20		253.06	2.51272e-20		253.94	1.5397e-20		253.27	1.9234e-20
271	6.42602e-20		271	5.82728e-20		331	5.4e-22		253.971	2.16488e-20		253.361	2.60776e-20		254.2	1.5576e-20		253.53	1.9149e-20
272	6.68383e-20		272	5.90054e-20		332	4.2e-22		254.281	2.28253e-20		253.662	2.71146e-20		254.46	1.5673e-20		253.79	1.9129e-20
273	6.76021e-20		273	5.97781e-20		333	3.3e-22		254.59	2.3837e-20		253.963	2.82309e-20		254.72	1.5721e-20		254.05	1.9197e-20
274	6.78886e-20		274	6.1211e-20		334	2.5e-22		254.9	2.47509e-20		254.264	2.94123e-20		254.99	1.5773e-20		254.31	1.9363e-20
275	6.97982e-20		275	6.09051e-20		335	2e-22		255.209	2.55155e-20		254.564	3.0565e-20		255.25	1.5861e-20		254.57	1.9619e-20
276	7.04666e-20		276	6.16055e-20		336	1.4e-22		255.519	2.60391e-20		254.865	3.15279e-20		255.51	1.5994e-20		254.83	1.9952e-20
277	7.16124e-20		277	6.09776e-20		337	1.1e-22		255.828	2.63796e-20		255.166	3.21936e-20		255.77	1.6162e-20		255.09	2.0355e-20
278	7.29492e-20		278	6.11627e-20		338	8e-23		256.138	2.67274e-20		255.467	3.25971e-20		256.04	1.6358e-20		255.35	2.0835e-20
279	7.54318e-20		279	6.11466e-20		339	7e-23		256.447	2.72696e-20		255.768	3.29709e-20		256.3	1.6596e-20		255.62	2.1427e-20
280	7.57182e-20		280	6.13318e-20		340	5e-23		256.756	2.80822e-20		256.069	3.34399e-20		256.57	1.6912e-20		255.88	2.2171e-20
281	7.80098e-20		281	6.19757e-20		341	5e-23		257.066	2.91155e-20		256.37	3.40278e-20		256.83	1.7346e-20		256.14	2.3073e-20
282	7.77233e-20		282	6.15572e-20		342	3e-23		257.375	3.00365e-20		256.67	3.46242e-20		257.1	1.7931e-20		256.41	2.4095e-20
283	7.73414e-20		283	6.14686e-20		343	3e-23		257.685	3.067e-20		256.971	3.50832e-20		257.37	1.8663e-20		256.67	2.5195e-20
284	7.79143e-20		284	5.96332e-20		344	2e-23		257.994	3.09344e-20		257.272	3.53611e-20		257.63	1.9487e-20		256.94	2.637e-20
285	7.86782e-20		285	5.86512e-20		345	1e-23		258.304	3.08995e-20		257.573	3.54275e-20		257.9	2.0326e-20		257.21	2.7655e-20
286	7.85827e-20		286	5.9263e-20		346	1e-23		258.613	3.07112e-20		257.874	3.52859e-20		258.17	2.1126e-20		257.47	2.9068e-20
287	7.86782e-20		287	5.64616e-20		347	0		258.923	3.05274e-20		258.175	3.50274e-20		258.44	2.1867e-20		257.74	3.0543e-20
288	7.91556e-20		288	5.64455e-20		348	1e-23		259.232	3.05405e-20		258.476	3.48583e-20		258.71	2.2537e-20		258.01	3.1957e-20
289	7.82008e-20		289	5.55198e-20		349	0		259.542	3.09147e-20		258.776	3.49844e-20		258.98	2.3139e-20		258.28	3.3195e-20
290	7.83917e-20		290	5.37891e-20		350	0		259.851	3.17159e-20		259.077	3.54679e-20		259.25	2.3729e-20		258.55	3.4214e-20
291	7.65775e-20		291	5.31853e-20		351	0		260.16	3.28483e-20		259.378	3.6285e-20		259.52	2.4455e-20		258.82	3.5086e-20
292	7.64821e-20		292	5.05772e-20		352	1e-23		260.47	3.41053e-20		259.679	3.73361e-20		259.79	2.5491e-20		259.09	3.5973e-20
293	7.58137e-20		293	4.79368e-20		353	0		260.779	3.52069e-20		259.98	3.84651e-20		260.07	2.6936e-20		259.36	3.7034e-20
294	7.52408e-20		294	4.71479e-20		354	0		261.089	3.60486e-20		260.281	3.95287e-20		260.34	2.8754e-20		259.63	3.8335e-20
295	7.37131e-20		295	4.5699e-20		355	0		261.398	3.64855e-20		260.582	4.04188e-20		260.61	3.0799e-20		259.9	3.9831e-20
296	7.35221e-20		296	4.36463e-20		296	4.06e-20		261.708	3.6692e-20		260.883	4.11114e-20		260.89	3.2859e-20		260.18	4.1349e-20
297	7.04666e-20		297	4.1827e-20		297	3.91e-20		262.017	3.68713e-20		261.183	4.15473e-20		261.16	3.4729e-20		260.45	4.264e-20
298	6.78886e-20		298	3.96696e-20		298	3.76e-20		262.327	3.71135e-20		261.484	4.18246e-20		261.44	3.6257e-20		260.72	4.3515e-20
299	6.61699e-20		299	3.82126e-20		299	3.6e-20		262.636	3.73317e-20		261.785	4.21056e-20		261.71	3.7346e-20		261	4.3991e-20
300	6.32099e-20		300	3.68119e-20		300	3.42e-20		262.946	3.74158e-20		262.086	4.25149e-20		261.99	3.7945e-20		261.27	4.4292e-20
301	6.14912e-20		301	3.4727e-20		301	3.22e-20		263.255	3.74036e-20		262.387	4.30651e-20		262.27	3.808e-20		261.55	4.4667e-20
302	5.91041e-20		302	3.16198e-20		302	3.02e-20		263.564	3.74606e-20		262.688	4.3716e-20		262.54	3.7882e-20		261.82	4.5253e-20
303	5.87222e-20		303	2.92451e-20		303	2.82e-20		263.874	3.77425e-20		262.989	4.4453e-20		262.82	3.7537e-20		262.1	4.6062e-20
304	5.57622e-20		304	2.71682e-20		304	2.63e-20		264.183	3.82692e-20		263.289	4.52625e-20		263.1	3.7176e-20		262.38	4.7033e-20
305	5.3948e-20		305	2.57273e-20		305	2.46e-20		264.493	3.88986e-20		263.59	4.62402e-20		263.38	3.6823e-20		262.66	4.8083e-20
306	5.07971e-20		306	2.36343e-20		306	2.3e-20		264.802	3.95105e-20		263.891	4.74906e-20		263.66	3.6469e-20		262.93	4.9155e-20
307	4.77416e-20		307	2.23464e-20		307	2.15e-20		265.112	4.00466e-20		264.192	4.90289e-20		263.94	3.6164e-20		263.21	5.0235e-20
308	4.64048e-20		308	1.95853e-20		308	1.99e-20		265.421	4.05118e-20		264.493	5.07032e-20		264.22	3.6045e-20		263.49	5.1347e-20
309	4.22036e-20		309	1.84663e-20		309	1.84e-20		265.731	4.09455e-20		264.794	5.23513e-20		264.51	3.6287e-20		263.77	5.2556e-20
310	3.90526e-20		310	1.75326e-20		310	1.69e-20		266.04	4.14509e-20		265.095	5.37366e-20		264.79	3.702e-20		264.05	5.3925e-20
311	3.58062e-20		311	1.58743e-20		311	1.53e-20		266.35	4.20905e-20		265.395	5.48452e-20		265.07	3.8248e-20		264.34	5.5425e-20
312	3.47559e-20		312	1.42643e-20		312	1.38e-20		266.659	4.28929e-20		265.696	5.57974e-20		265.35	3.9825e-20		264.62	5.6888e-20
313	2.95998e-20		313	1.17689e-20		313	1.24e-20		266.968	4.38747e-20		265.997	5.66455e-20		265.64	4.1508e-20		264.9	5.812e-20
314	2.8454e-20		314	1.098e-20		314	1.11e-20		267.278	4.48809e-20		266.298	5.73158e-20		265.92	4.3068e-20		265.18	5.9124e-20
315	2.69263e-20		315	9.33782e-21		315	9.92e-21		267.587	4.57537e-20		266.599	5.77023e-20		266.21	4.4395e-20		265.47	6.0144e-20
316	2.38708e-20		316	8.17864e-21		316	8.83e-21		267.897	4.63882e-20		266.9	5.7878e-20		266.5	4.5501e-20		265.75	6.1474e-20
317	2.18657e-20		317	6.59282e-21		317	7.83e-21		268.206	4.68039e-20		267.201	5.80318e-20		266.78	4.6456e-20		266.04	6.3229e-20
318	2.0147e-20		318	6.21448e-21		318	6.91e-21		268.516	4.71152e-20		267.501	5.82545e-20		267.07	4.7344e-20		266.32	6.526e-20
319	1.70915e-20		319	5.17605e-21		319	6.05e-21		268.825	4.74373e-20		267.802	5.84466e-20		267.36	4.8244e-20		266.61	6.7166e-20
320	1.55638e-20		320	5.0714e-21		320	5.25e-21		269.135	4.78077e-20		268.103	5.84461e-20		267.65	4.9214e-20		266.9	6.847e-20
321	1.26038e-20		321	3.12334e-21		321	4.52e-21		269.444	4.8202e-20		268.404	5.81743e-20		267.93	5.0283e-20		267.18	6.8924e-20
322	1.1649e-20		322	3.00259e-21		322	3.87e-21		269.754	4.85858e-20		268.705	5.76445e-20		268.22	5.1419e-20		267.47	6.8688e-20
323	9.54832e-21		323	2.86574e-21		323	3.28e-21		270.063	4.88875e-20		269.006	5.69254e-20		268.52	5.252e-20		267.76	6.8192e-20
324	9.64381e-21		324	1.62607e-21		324	2.77e-21		270.372	4.9008e-20		269.307	5.60397e-20		268.81	5.3474e-20		268.05	6.7909e-20
325	7.16124e-21		325	1.73877e-21		325	2.32e-21		270.682	4.89212e-20		269.607	5.51073e-20		269.1	5.4277e-20		268.34	6.8185e-20
326	6.77931e-21		326	1.98831e-21		326	1.94e-21		270.991	4.87274e-20		269.908	5.42961e-20		269.39	5.5068e-20		268.63	6.9131e-20
327	4.96513e-21		327	6.11788e-22		327	1.62e-21		271.301	4.85976e-20		270.209	5.37818e-20		269.68	5.6027e-20		268.92	7.063e-20
328	4.10578e-21		328	8.61333e-22		328	1.34e-21		271.61	4.86317e-20		270.51	5.3704e-20		269.98	5.7209e-20		269.21	7.2475e-20
329	2.38708e-21		329	5.95688e-22		329	1.11e-21		271.92	4.87672e-20		270.811	5.41514e-20		270.27	5.8476e-20		269.51	7.4548e-20
330	3.91481e-21		330	8.53283e-22		330	8.98e-22		272.229	4.88122e-20		271.112	5.50929e-20		270.57	5.9592e-20		269.8	7.6858e-20
331	2.10063e-21		331	4.74941e-22		331	7.26e-22		272.539	4.85946e-20		271.413	5.62233e-20		270.86	6.0385e-20		270.09	7.941e-20
332	1.1458e-21		332	7.08386e-22		332	5.91e-22		272.848	4.80692e-20		271.713	5.72463e-20		271.16	6.0856e-20		270.39	8.2045e-20
333	2.2916e-21		333	3.38093e-22		333	4.78e-22		273.158	4.73105e-20		272.014	5.79395e-20		271.45	6.1196e-20		270.68	8.4443e-20
334	2.2916e-21		334	9.41832e-22		334	3.86e-22		273.467	4.64408e-20		272.315	5.82945e-20		271.75	6.1696e-20		270.98	8.6325e-20
335	4.77416e-22		335	-6.43987e-23		335	3.11e-22		273.776	4.56275e-20		272.616	5.84646e-20		272.05	6.2584e-20		271.28	8.7586e-20
336	3.81933e-22		336	5.55439e-22					274.086	4.50822e-20		272.917	5.86227e-20		272.35	6.3914e-20		271.57	8.8252e-20
337	1.05032e-21		337	-6.60087e-22					274.395	4.49432e-20		273.218	5.88961e-20		272.65	6.554e-20		271.87	8.8406e-20
338	4.77416e-22		338	-1.52947e-22					274.705	4.52847e-20		273.519	5.9335e-20		272.95	6.7192e-20		272.17	8.819e-20
339	4.77416e-22		339	8.85483e-23					275.014	4.59885e-20		273.819	5.98079e-20		273.25	6.8614e-20		272.47	8.7827e-20
340	1.05032e-21		340	-5.63489e-23					275.324	4.6875e-20		274.12	6.00706e-20		273.55	6.9643e-20		272.77	8.7567e-20
341	4.77416e-22		341	1.52947e-22					275.633	4.76599e-20		274.421	5.99317e-20		273.85	7.0237e-20		273.07	8.7585e-20
342	1.05032e-21		342	-1.60997e-22					275.943	4.82113e-20		274.722	5.94273e-20		274.16	7.0482e-20		273.37	8.7904e-20
343	0		343	6.11788e-22					276.252	4.84979e-20		275.023	5.8764e-20		274.46	7.0559e-20		273.67	8.8427e-20
344	6.68383e-22		344	-8.21084e-22					276.562	4.85987e-20		275.324	5.82903e-20		274.76	7.0671e-20		273.97	8.9035e-20
345	3.81933e-22		345	2.09296e-22					276.871	4.86792e-20		275.625	5.82364e-20		275.07	7.0955e-20		274.28	8.9662e-20
346	1.90966e-22		346	-7.40586e-22					277.181	4.89021e-20		275.925	5.86075e-20		275.37	7.1422e-20		274.58	9.0294e-20
347	-9.54832e-23		347	-8.85483e-23					277.49	4.93505e-20		276.226	5.92166e-20		275.68	7.2007e-20		274.89	9.0924e-20
348	2.8645e-22		348	-2.41495e-23					277.799	4.99576e-20		276.527	5.97763e-20		275.99	7.2686e-20		275.19	9.1528e-20
349	4.77416e-22		349	1.12698e-22					278.109	5.05306e-20		276.828	6.0082e-20		276.29	7.3507e-20		275.5	9.2109e-20
350	2.8645e-22		350	-4.82991e-23					278.418	5.08782e-20		277.129	6.00774e-20		276.6	7.4487e-20		275.8	9.2773e-20
351	4.77416e-22		351	4.66891e-22					278.728	5.09494e-20		277.43	5.97983e-20		276.91	7.5513e-20		276.11	9.3703e-20
352	2.8645e-22		352	3.13944e-22					279.037	5.08308e-20		277.731	5.92916e-20		277.22	7.641e-20		276.42	9.5033e-20
353	1.90966e-22		353	-4.02492e-23					279.347	5.06919e-20		278.032	5.86332e-20		277.53	7.7119e-20		276.73	9.6707e-20
354	3.81933e-22		354	4.74941e-22					279.656	5.06551e-20		278.332	5.78764e-20		277.84	7.7744e-20		277.03	9.8484e-20
355	5.72899e-22		355	1.85146e-22					279.966	5.07139e-20		278.633	5.7167e-20		278.15	7.8431e-20		277.34	1.00067e-19
356	-9.54832e-23		356	-7.40174e-38					280.275	5.07425e-20		278.934	5.66485e-20		278.47	7.9266e-20		277.66	1.01247e-19
357	5.72899e-22		357	-1.04648e-22					280.585	5.05937e-20		279.235	5.6418e-20		278.78	8.0283e-20		277.97	1.01936e-19
358	1.90966e-22		358	-1.69047e-22					280.894	5.02244e-20		279.536	5.64709e-20		279.09	8.1484e-20		278.28	1.0214e-19
359	0		359	1.28797e-22					281.203	4.97418e-20		279.837	5.67652e-20		279.41	8.2779e-20		278.59	1.0196e-19
360	-9.54832e-23		360	4.82991e-23					281.513	4.93293e-20		280.138	5.72638e-20		279.72	8.3991e-20		278.9	1.01623e-19
361	3.81933e-22		361	-3.21994e-23					281.822	4.91476e-20		280.438	5.8019e-20		280.04	8.4936e-20		279.22	1.01418e-19
362	-9.54832e-23		362	6.76187e-22					282.132	4.92791e-20		280.739	5.90543e-20		280.35	8.5508e-20		279.53	1.01499e-19
363	5.72899e-22		363	-4.66891e-22					282.441	4.97308e-20		281.04	6.02698e-20		280.67	8.5716e-20		279.85	1.01801e-19
364	2.8645e-22		364	3.54193e-22					282.751	5.04608e-20		281.341	6.1449e-20		280.99	8.5663e-20		280.16	1.02166e-19
365	1.05032e-21		365	-3.78343e-22					283.06	5.13891e-20		281.642	6.22962e-20		281.31	8.5517e-20		280.48	1.02453e-19
366	2.8645e-22		366	-2.01246e-22					283.37	5.23658e-20		281.943	6.26269e-20		281.63	8.5465e-20		280.8	1.02587e-19
367	0		367	1.69047e-22					283.679	5.32742e-20		282.244	6.24779e-20		281.95	8.5633e-20		281.12	1.02561e-19
368	-9.54832e-23		368	1.36847e-22					283.989	5.39997e-20		282.544	6.20738e-20		282.27	8.6026e-20		281.44	1.02382e-19
369	0		369	-6.35938e-22					284.298	5.45473e-20		282.845	6.1666e-20		282.59	8.6546e-20		281.76	1.0201e-19
370	7.63866e-22		370	-2.01246e-22					284.607	5.49643e-20		283.146	6.13859e-20		282.91	8.7046e-20		282.08	1.01395e-19
371	2.8645e-22		371	-8.85483e-22					284.917	5.52751e-20		283.447	6.11751e-20		283.24	8.7361e-20		282.4	1.00556e-19
372	-9.54832e-23		372	-5.79589e-22					285.226	5.54484e-20		283.748	6.09257e-20		283.56	8.7307e-20		282.72	9.9554e-20
373	1.90966e-22		373	-2.65645e-22					285.536	5.53889e-20		284.049	6.06037e-20		283.89	8.6726e-20		283.04	9.8417e-20
374	1.90966e-22		374	9.65981e-23					285.845	5.50308e-20		284.35	6.02514e-20		284.21	8.5563e-20		283.37	9.7108e-20
375	1.90966e-22		375	1.85146e-22					286.155	5.4372e-20		284.65	5.99097e-20		284.54	8.3874e-20		283.69	9.5606e-20
376	7.63866e-22		376	4.82991e-23					286.464	5.34878e-20		284.951	5.95552e-20		284.86	8.1808e-20		284.02	9.3985e-20
377	6.68383e-22		377	2.17346e-22					286.774	5.25012e-20		285.252	5.90554e-20		285.19	7.9605e-20		284.34	9.2432e-20
378	3.81933e-22		378	2.89794e-22					287.083	5.15632e-20		285.553	5.82536e-20		285.52	7.7528e-20		284.67	9.1144e-20
379	6.68383e-22		379	2.57595e-22					287.393	5.07259e-20		285.854	5.70779e-20		285.85	7.5774e-20		284.99	9.0171e-20
380	1.90966e-22		380	-9.65981e-23					287.702	5.00237e-20		286.155	5.55878e-20		286.18	7.4406e-20		285.32	8.9386e-20
381	3.81933e-22		381	3.21994e-22					288.011	4.93883e-20		286.456	5.39203e-20		286.51	7.3351e-20		285.65	8.8632e-20
382	4.77416e-22		382	-3.78343e-22					288.321	4.86545e-20		286.756	5.2208e-20		286.84	7.2397e-20		285.98	8.783e-20
383	-2.8645e-22		383	2.81745e-22					288.63	4.77164e-20		287.057	5.0528e-20		287.17	7.1277e-20		286.31	8.6943e-20
384	4.77416e-22		384	2.57595e-22					288.94	4.6521e-20		287.358	4.88889e-20		287.51	6.9805e-20		286.64	8.5948e-20
385	1.90966e-22		385	-1.52947e-22					289.249	4.50704e-20		287.659	4.73068e-20		287.84	6.7981e-20		286.97	8.488e-20
386	4.77416e-22		386	2.73695e-22					289.559	4.34609e-20		287.96	4.57076e-20		288.17	6.5949e-20		287.31	8.3782e-20
387	3.81933e-22		387	-1.20748e-22					289.868	4.18128e-20		288.261	4.41346e-20		288.51	6.3885e-20		287.64	8.2607e-20
388	7.63866e-22		388	2.01246e-22					290.178	4.01657e-20		288.562	4.25825e-20		288.85	6.1943e-20		287.97	8.1245e-20
389	4.77416e-22		389	-1.04648e-22					290.487	3.85851e-20		288.862	4.10558e-20		289.18	6.0223e-20		288.31	7.9647e-20
390	9.54832e-23		390	-5.63489e-23					290.797	3.71533e-20		289.163	3.96217e-20		289.52	5.8713e-20		288.64	7.7852e-20
391	0		391	-2.89794e-22					291.106	3.59672e-20		289.464	3.82989e-20		289.86	5.7308e-20		288.98	7.5938e-20
392	5.72899e-22		392	-1.12698e-22					291.415	3.50012e-20		289.765	3.71358e-20		290.2	5.5926e-20		289.32	7.3971e-20
393	0		393	5.63489e-23					291.725	3.41612e-20		290.066	3.62371e-20		290.54	5.4576e-20		289.66	7.1994e-20
394	0		394	8.04984e-23					292.034	3.3293e-20		290.367	3.55358e-20		290.88	5.3332e-20		289.99	7.003e-20
395	-9.54832e-23		395	4.82991e-23					292.344	3.23503e-20		290.668	3.49738e-20		291.22	5.2274e-20		290.33	6.8112e-20
396	-9.54832e-23		396	-4.02492e-23					292.653	3.13376e-20		290.968	3.44791e-20		291.56	5.1434e-20		290.67	6.6296e-20
397	8.59349e-22		397	-1.28797e-22					292.963	3.03222e-20		291.269	3.39838e-20		291.91	5.0782e-20		291.02	6.464e-20
398	3.81933e-22		398	-1.60997e-23					293.272	2.94078e-20		291.57	3.34349e-20		292.25	5.0241e-20		291.36	6.3155e-20
399	5.72899e-22		399	3.13944e-22					293.582	2.86389e-20		291.871	3.27947e-20		292.59	4.9731e-20		291.7	6.1818e-20
400	0		400	1.52947e-22					293.891	2.8064e-20		292.172	3.20803e-20		292.94	4.917e-20		292.04	6.0615e-20
401	9.54832e-23		401	-1.77097e-22					294.201	2.76387e-20		292.473	3.13364e-20		293.29	4.8465e-20		292.39	5.9535e-20
402	1.90966e-22		402	3.30044e-22					294.51	2.7254e-20		292.774	3.05479e-20		293.63	4.7563e-20		292.73	5.8528e-20
403	9.54832e-23		403	3.38093e-22					294.819	2.68382e-20		293.075	2.97391e-20		293.98	4.6505e-20		293.08	5.7496e-20
404	9.54832e-23		404	1.44897e-22					295.129	2.63606e-20		293.375	2.8862e-20		294.33	4.5401e-20		293.43	5.6348e-20
405	0		405	-4.02492e-23					295.438	2.58226e-20		293.676	2.78575e-20		294.68	4.4325e-20		293.77	5.5076e-20
406	-3.81933e-22		406	-5.63489e-23					295.748	2.52418e-20		293.977	2.67166e-20		295.03	4.3262e-20		294.12	5.3774e-20
407	2.8645e-22		407	3.30044e-22					296.057	2.46257e-20		294.278	2.54937e-20		295.38	4.2171e-20		294.47	5.2564e-20
408	0		408	1.36847e-22					296.367	2.39457e-20		294.579	2.42329e-20		295.74	4.1058e-20		294.82	5.1467e-20
409	-9.54832e-23		409	-8.04984e-23					296.676	2.32321e-20		294.88	2.30351e-20		296.09	3.9972e-20		295.17	5.0346e-20
410	0		410	-3.46143e-22					296.986	2.24803e-20		295.181	2.19382e-20		296.44	3.8951e-20		295.52	4.9001e-20
411	-4.77416e-22		411	1.36847e-22					297.295	2.17436e-20		295.481	2.09815e-20		296.8	3.7981e-20		295.88	4.7366e-20
412	-9.54832e-23		412	4.9104e-22					297.605	2.10225e-20		295.782	2.01507e-20		297.15	3.6983e-20		296.23	4.5564e-20
413	7.63866e-22		413	3.78343e-22					297.914	2.03476e-20		296.083	1.94399e-20		297.51	3.5849e-20		296.58	4.3769e-20
414	2.8645e-22		414	8.04984e-24					298.224	1.97402e-20		296.384	1.884e-20		297.87	3.4522e-20		296.94	4.2063e-20
415	-1.90966e-22		415	-7.24486e-23					298.533	1.91898e-20		296.685	1.83269e-20		298.23	3.305e-20		297.3	4.0437e-20
416	1.90966e-22		416	4.82991e-23					298.842	1.86719e-20		296.986	1.7834e-20		298.58	3.1569e-20		297.65	3.8884e-20
417	0		417	1.60997e-23					299.152	1.81218e-20		297.287	1.73502e-20		298.94	3.0229e-20		298.01	3.7445e-20
418	4.77416e-22		418	-2.41495e-23					299.461	1.75043e-20		297.587	1.68546e-20		299.31	2.9165e-20		298.37	3.6177e-20
419	0		419	-4.82991e-23					299.771	1.68406e-20		297.888	1.63309e-20		299.67	2.8468e-20		298.73	3.5095e-20
420	-9.54832e-23		420	3.05894e-22					300.08	1.61453e-20		298.189	1.57816e-20		300.03	2.814e-20		299.09	3.4182e-20
421	0		421	3.21994e-22					300.39	1.54376e-20		298.49	1.52369e-20		300.39	2.8084e-20		299.45	3.3415e-20
422	9.54832e-23		422	-2.41495e-23					300.699	1.475e-20		298.791	1.4721e-20		300.76	2.8178e-20		299.81	3.2759e-20
423	0		423	1.85146e-22					301.009	1.41062e-20		299.092	1.4255e-20		301.12	2.8357e-20		300.17	3.2163e-20
424	5.72899e-22		424	-4.02492e-23					301.318	1.34968e-20		299.393	1.38451e-20		301.49	2.8633e-20		300.54	3.16e-20
425	5.72899e-22		425	3.05894e-22					301.628	1.29714e-20		299.693	1.34691e-20		301.86	2.9051e-20		300.9	3.1092e-20
426	3.81933e-22		426	8.85483e-23					301.937	1.25343e-20		299.994	1.30981e-20		302.22	2.9622e-20		301.27	3.0699e-20
427	-9.54832e-23		427	3.21994e-23					302.246	1.21787e-20		300.295	1.26989e-20		302.59	3.0294e-20		301.64	3.0471e-20
428	2.8645e-22		428	3.38093e-22					302.556	1.18849e-20		300.596	1.22492e-20		302.96	3.0969e-20		302	3.0407e-20
429	0		429	1.69047e-22					302.865	1.16181e-20		300.897	1.17507e-20		303.33	3.155e-20		302.37	3.0466e-20
430	3.81933e-22		430	4.82991e-23					303.175	1.13206e-20		301.198	1.12396e-20		303.7	3.1975e-20		302.74	3.0583e-20
431	2.8645e-22		431	-1.20748e-22					303.484	1.09771e-20		301.499	1.07318e-20		304.08	3.2192e-20		303.11	3.0656e-20
432	-1.90966e-22		432	-1.60997e-23					303.794	1.05958e-20		301.799	1.02337e-20		304.45	3.2127e-20		303.48	3.0559e-20
433	-9.54832e-23		433	4.10542e-22					304.103	1.01901e-20		302.1	9.77444e-21		304.82	3.1669e-20		303.85	3.0188e-20
434	9.54832e-23		434	2.01246e-22					304.413	9.77694e-21		302.401	9.33136e-21		305.2	3.0727e-20		304.23	2.9485e-20
435	4.77416e-22		435	1.52947e-22					304.722	9.37534e-21		302.702	8.88605e-21		305.58	2.9308e-20		304.6	2.8428e-20
436	9.54832e-23		436	5.63489e-23					305.032	8.97324e-21		303.003	8.43602e-21		305.95	2.7566e-20		304.97	2.707e-20
437	9.54832e-23		437	-1.60997e-22					305.341	8.5779e-21		303.304	7.98559e-21		306.33	2.576e-20		305.35	2.5574e-20
438	-9.54832e-23		438	1.12698e-22					305.65	8.16573e-21		303.605	7.54208e-21		306.71	2.4127e-20		305.73	2.4152e-20
439	-9.54832e-23		439	-1.60997e-23					305.96	7.73254e-21		303.905	7.12933e-21		307.09	2.2775e-20		306.1	2.295e-20
440	1.90966e-22		440	4.66891e-22					306.269	7.28744e-21		304.206	6.76523e-21		307.47	2.1657e-20		306.48	2.2022e-20
441	0		441	4.02492e-23					306.579	6.83439e-21		304.507	6.44423e-21		307.85	2.0647e-20		306.86	2.1357e-20
442	2.8645e-22		442	2.25396e-22					306.888	6.40269e-21		304.808	6.1699e-21		308.23	1.9651e-20		307.24	2.0905e-20
443	2.8645e-22		443	4.82991e-23					307.198	6.00496e-21		305.109	5.95145e-21		308.62	1.8678e-20		307.62	2.0575e-20
444	-9.54832e-23		444	1.44897e-22					307.507	5.64797e-21		305.41	5.80069e-21		309	1.7805e-20		308	2.0253e-20
445	3.81933e-22		445	2.09296e-22					307.817	5.33579e-21		305.711	5.69942e-21		309.39	1.7091e-20		308.39	1.9829e-20
446	2.8645e-22		446	2.89794e-22					308.126	5.07111e-21		306.011	5.63812e-21		309.77	1.6519e-20		308.77	1.9217e-20
447	0		447	1.44897e-22					308.436	4.87293e-21		306.312	5.6094e-21		310.16	1.5988e-20		309.16	1.837e-20
448	9.54832e-23		448	3.21994e-23					308.745	4.71772e-21		306.613	5.59994e-21		310.55	1.5385e-20		309.54	1.7312e-20
449	9.54832e-23		449	4.02492e-23					309.054	4.60955e-21		306.914	5.60364e-21		310.94	1.4654e-20		309.93	1.6141e-20
450	1.90966e-22		450	1.77097e-22					309.364	4.54697e-21		307.215	5.60052e-21		311.33	1.3824e-20		310.32	1.4989e-20
225.6	1.93812e-19			--					309.673	4.52882e-21		307.516	5.58332e-21		311.72	1.2968e-20		310.71	1.3959e-20
225.7	2.3245e-19			--					309.983	4.55942e-21		307.817	5.54892e-21		312.11	1.2159e-20		311.1	1.3082e-20
225.8	2.02533e-19		226	6.87464e-22					310.292	4.6112e-21		308.117	5.49789e-21		312.51	1.1445e-20		311.49	1.2328e-20
225.9	2.01451e-19		226.1	8.78426e-22					310.602	4.66728e-21		308.418	5.43493e-21		312.9	1.0837e-20		311.88	1.1648e-20
226	2.09344e-19		226.2	3.0554e-22					310.911	4.7102e-21		308.719	5.36348e-21		313.3	1.0327e-20		312.27	1.1024e-20
226.1	2.03997e-19		226.3	1.06939e-21					311.221	4.71847e-21		309.02	5.28205e-21		313.69	9.905e-21		312.67	1.0474e-20
226.2	2.07625e-19		226.4	6.87464e-22					311.53	4.66378e-21		309.321	5.19597e-21		314.09	9.565e-21		313.06	1.0028e-20
226.3	2.03487e-19		226.5	6.2381e-22					311.84	4.56751e-21		309.622	5.08951e-21		314.49	9.309e-21		313.46	9.687e-21
226.4	2.08134e-19		226.6	1.13304e-21					312.149	4.44546e-21		309.923	4.9592e-21		314.89	9.145e-21		313.85	9.435e-21
226.5	2.06416e-19		226.7	1.14578e-22					312.458	4.31203e-21		310.224	4.81857e-21		315.29	9.082e-21		314.25	9.245e-21
226.6	2.0005e-19		226.8	9.4208e-22					312.768	4.18018e-21		310.524	4.67356e-21		315.69	9.104e-21		314.65	9.089e-21
226.7	2.04124e-19		226.9	6.2381e-22					313.077	4.06758e-21		310.825	4.52743e-21		316.09	9.15e-21		315.05	8.917e-21
226.8	2.0457e-19		227	1.51497e-21					313.387	3.97582e-21		311.126	4.40104e-21		316.5	9.121e-21		315.45	8.676e-21
226.9	2.1329e-19		227.1	1.26035e-21					313.696	3.90033e-21		311.427	4.29746e-21		316.9	8.923e-21		315.85	8.338e-21
227	2.07434e-19		227.2	1.324e-21					314.006	3.83566e-21		311.728	4.21934e-21		317.31	8.527e-21		316.25	7.922e-21
227.1	2.11699e-19		227.3	1.26035e-21					314.315	3.77071e-21		312.029	4.16789e-21		317.71	7.987e-21		316.66	7.473e-21
227.2	2.15009e-19		227.4	1.1967e-21					314.625	3.69486e-21		312.33	4.14935e-21		318.12	7.395e-21		317.06	7.044e-21
227.3	2.08198e-19		227.5	6.87464e-22					314.934	3.6123e-21		312.63	4.14866e-21		318.53	6.825e-21		317.47	6.68e-21
227.4	2.03042e-19		227.6	8.14772e-22					315.244	3.52737e-21		312.931	4.15451e-21		318.94	6.308e-21		317.88	6.402e-21
227.5	2.159e-19		227.7	1.57862e-21					315.553	3.44619e-21		313.232	4.16072e-21		319.35	5.85e-21		318.28	6.212e-21
227.6	2.04824e-19		227.8	6.2381e-22					315.862	3.37377e-21		313.533	4.16132e-21		319.76	5.457e-21		318.69	6.087e-21
227.7	2.06988e-19		227.9	1.70593e-21					316.172	3.31554e-21		313.834	4.14663e-21		320.17	5.132e-21		319.1	5.988e-21
227.8	2.11699e-19		228	1.00573e-21					316.481	3.27435e-21		314.135	4.12018e-21		320.59	4.879e-21		319.51	5.864e-21
227.9	2.03233e-19		228.1	1.45131e-21					316.791	3.25232e-21		314.436	4.08405e-21		321	4.699e-21		319.93	5.676e-21
228	2.17491e-19		228.2	1.45131e-21					317.1	3.26187e-21		314.736	4.0357e-21		321.42	4.592e-21		320.34	5.424e-21
228.1	2.04888e-19		228.3	1.51497e-21					317.41	3.28748e-21		315.037	3.97212e-21		321.84	4.555e-21		320.75	5.144e-21
228.2	2.09216e-19		228.4	1.57862e-21					317.719	3.32382e-21		315.338	3.89289e-21		322.25	4.576e-21		321.17	4.863e-21
228.3	2.03806e-19		228.5	1.57862e-21					318.029	3.36499e-21		315.639	3.79466e-21		322.67	4.633e-21		321.59	4.596e-21
228.4	2.0406e-19		228.6	2.53343e-21					318.338	3.38773e-21		315.94	3.67105e-21		323.09	4.699e-21		322	4.337e-21
228.5	2.05461e-19		228.7	1.51497e-21					318.648	3.3823e-21		316.241	3.53114e-21		323.52	4.745e-21		322.42	4.078e-21
228.6	2.0266e-19		228.8	1.57862e-21					318.957	3.34651e-21		316.542	3.38864e-21		323.94	4.745e-21		322.84	3.823e-21
228.7	2.12781e-19		228.9	1.76958e-21					319.266	3.27829e-21		316.842	3.24664e-21		324.36	4.681e-21		323.26	3.585e-21
228.8	1.93303e-19		229	2.21516e-21					319.576	3.17202e-21		317.143	3.11587e-21		324.79	4.548e-21		323.68	3.378e-21
228.9	2.0126e-19		229.1	1.76958e-21					319.885	3.04875e-21		317.444	3.01068e-21		325.21	4.347e-21		324.11	3.207e-21
229	2.03806e-19		229.2	2.66074e-21					320.195	2.91583e-21		317.745	2.92442e-21		325.64	4.094e-21		324.53	3.073e-21
229.1	2.06352e-19		229.3	1.83324e-21					320.504	2.77726e-21		318.046	2.85778e-21		326.07	3.817e-21		324.96	2.977e-21
229.2	2.11762e-19		229.4	2.15151e-21					320.814	2.64679e-21		318.347	2.81071e-21		326.5	3.537e-21		325.38	2.916e-21
229.3	2.0597e-19		229.5	1.83324e-21					321.123	2.5334e-21		318.648	2.76759e-21		326.93	3.262e-21		325.81	2.89e-21
229.4	2.02469e-19		229.6	2.40612e-21					321.433	2.43508e-21		318.948	2.71922e-21		327.36	2.997e-21		326.24	2.902e-21
229.5	2.05779e-19		229.7	2.53343e-21					321.742	2.35224e-21		319.249	2.66281e-21		327.79	2.754e-21		326.67	2.953e-21
229.6	2.08643e-19		229.8	2.0242e-21					322.052	2.29628e-21		319.55	2.58021e-21		328.23	2.538e-21		327.1	3.045e-21
229.7	2.2984e-19		229.9	2.0242e-21					322.361	2.25689e-21		319.851	2.48237e-21		328.66	2.352e-21		327.53	3.168e-21
229.8	2.07689e-19		230	2.72439e-21					322.67	2.23361e-21		320.152	2.37626e-21		329.1	2.195e-21		327.97	3.298e-21
229.9	1.98713e-19		230.1	2.78805e-21					322.98	2.22518e-21		320.453	2.26773e-21		329.53	2.062e-21		328.4	3.391e-21
230	2.21502e-19		230.2	2.0242e-21					323.289	2.23244e-21		320.754	2.16821e-21		329.97	1.949e-21		328.84	3.393e-21
230.1	2.02023e-19		230.3	1.96054e-21					323.599	2.24176e-21		321.054	2.07725e-21		330.41	1.852e-21		329.27	3.282e-21
230.2	2.0126e-19		230.4	1.76958e-21					323.908	2.24906e-21		321.355	1.99562e-21		330.85	1.767e-21		329.71	3.081e-21
230.3	2.13036e-19		230.5	2.27881e-21					324.218	2.24563e-21		321.656	1.92799e-21		331.3	1.693e-21		330.15	2.844e-21
230.4	2.10044e-19		230.6	1.89689e-21					324.527	2.21224e-21		321.957	1.87155e-21		331.74	1.628e-21		330.59	2.612e-21
230.5	2.11253e-19		230.7	2.0242e-21					324.837	2.15714e-21		322.258	1.82338e-21		332.18	1.569e-21		331.03	2.408e-21
230.6	2.09662e-19		230.8	2.97901e-21					325.146	2.08092e-21		322.559	1.7845e-21		332.63	1.515e-21		331.47	2.237e-21
230.7	2.20101e-19		230.9	2.59708e-21					325.456	1.98668e-21		322.86	1.75801e-21		333.08	1.467e-21		331.92	2.096e-21
230.8	2.03296e-19		231	2.78805e-21					325.765	1.89048e-21		323.16	1.73557e-21		333.52	1.423e-21		332.36	1.98e-21
230.9	2.06543e-19		231.1	3.10632e-21					326.075	1.79787e-21		323.461	1.71585e-21		333.97	1.382e-21		332.81	1.885e-21
231	2.01514e-19		231.2	2.40612e-21					326.384	1.71257e-21		323.762	1.69546e-21		334.42	1.344e-21		333.25	1.808e-21
231.1	1.94767e-19		231.3	2.91535e-21					326.693	1.643e-21		324.063	1.66676e-21		334.88	1.309e-21		333.7	1.744e-21
231.2	2.15136e-19		231.4	2.59708e-21					327.003	1.58404e-21		324.364	1.63026e-21		335.33	1.276e-21		334.15	1.693e-21
231.3	2.01132e-19		231.5	2.72439e-21					327.312	1.5354e-21		324.665	1.58552e-21		335.78	1.245e-21		334.6	1.653e-21
231.4	1.96995e-19		231.6	2.91535e-21					327.622	1.49953e-21		324.966	1.53033e-21		336.24	1.216e-21		335.06	1.623e-21
231.5	2.03933e-19		231.7	3.10632e-21					327.931	1.47225e-21		325.266	1.47374e-21		336.69	1.189e-21		335.51	1.603e-21
231.6	2.05333e-19		231.8	2.78805e-21					328.241	1.44868e-21		325.567	1.41803e-21		337.15	1.163e-21		335.96	1.593e-21
231.7	2.09789e-19		231.9	2.59708e-21					328.55	1.42766e-21		325.868	1.36527e-21		337.61	1.138e-21		336.42	1.59e-21
231.8	2.15518e-19		232	2.91535e-21					328.86	1.40248e-21		326.169	1.31662e-21		338.07	1.115e-21		336.88	1.592e-21
231.9	2.08452e-19		232.1	3.04266e-21					329.169	1.37281e-21		326.47	1.27161e-21		338.53	1.093e-21		337.34	1.588e-21
232	2.04379e-19		232.2	2.97901e-21					329.479	1.33907e-21		326.771	1.23044e-21		339	1.072e-21		337.79	1.569e-21
232.1	1.98013e-19		232.3	3.16997e-21					329.788	1.30029e-21		327.072	1.19254e-21		339.46	1.052e-21		338.26	1.53e-21
232.2	2.04824e-19		232.4	3.74286e-21					330.097	1.25962e-21		327.372	1.15672e-21		339.92	1.033e-21		338.72	1.477e-21
232.3	2.07116e-19		232.5	3.16997e-21					330.407	1.21848e-21		327.673	1.12326e-21		340.39	1.014e-21		339.18	1.416e-21
232.4	2.13481e-19		232.6	3.29728e-21					330.716	1.17787e-21		327.974	1.09339e-21		340.86	9.97e-22		339.65	1.358e-21
232.5	2.00114e-19		232.7	3.99747e-21					331.026	1.13947e-21		328.275	1.06538e-21		341.33	9.81e-22		340.11	1.305e-21
232.6	1.92093e-19		232.8	3.48824e-21					331.335	1.102e-21		328.576	1.03965e-21		341.8	9.65e-22		340.58	1.258e-21
232.7	2.07243e-19		232.9	4.18843e-21					331.645	1.06564e-21		328.877	1.01675e-21		342.27	9.5e-22		341.05	1.218e-21
232.8	2.05206e-19		233	4.06113e-21					331.954	1.03074e-21		329.178	9.94825e-22		342.74	9.36e-22		341.52	1.182e-21
232.9	2.0266e-19		233.1	4.06113e-21					332.264	9.97241e-22		329.479	9.73896e-22		343.22	9.22e-22		341.99	1.151e-21
233	2.07434e-19		233.2	3.80651e-21					332.573	9.65403e-22		329.779	9.54452e-22		343.69	9.1e-22		342.46	1.123e-21
233.1	1.97695e-19		233.3	3.99747e-21					332.883	9.35907e-22		330.08	9.36088e-22		344.17	8.98e-22		342.93	1.097e-21
233.2	2.00941e-19		233.4	4.12478e-21					333.192	9.09784e-22		330.381	9.18327e-22		344.65	8.88e-22		343.41	1.074e-21
233.3	2.03424e-19		233.5	3.74286e-21					333.501	8.85544e-22		330.682	9.01324e-22		345.13	8.78e-22		343.88	1.052e-21
233.4	1.96676e-19		233.6	4.06113e-21					333.811	8.63021e-22		330.983	8.85616e-22		345.61	8.71e-22		344.36	1.032e-21
233.5	2.04761e-19		233.7	4.5067e-21					334.12	8.43261e-22		331.284	8.704e-22		346.09	8.64e-22		344.84	1.014e-21
233.6	2.0005e-19		233.8	4.63401e-21					334.43	8.24541e-22		331.585	8.5574e-22		346.58	8.6e-22		345.32	9.96e-22
233.7	2.09344e-19		233.9	4.3794e-21					334.739	8.06667e-22		331.885	8.42621e-22		347.06	8.58e-22		345.8	9.79e-22
233.8	2.01005e-19		234	4.76132e-21					335.049	7.91072e-22		332.186	8.2976e-22		347.55	8.59e-22		346.29	9.63e-22
233.9	1.98141e-19		234.1	4.57036e-21					335.358	7.761e-22		332.487	8.17277e-22		348.04	8.64e-22		346.77	9.48e-22
234	1.88274e-19		234.2	4.57036e-21					335.668	7.6163e-22		332.788	8.05729e-22		348.52	8.7e-22		347.26	9.34e-22
234.1	1.98459e-19		234.3	4.95228e-21					335.977	7.48087e-22		333.089	7.94657e-22		349.02	8.78e-22		347.74	9.2e-22
234.2	2.03424e-19		234.4	4.76132e-21					336.287	7.35081e-22		333.39	7.8421e-22		349.51	8.81e-22		348.23	9.06e-22
234.3	2.02851e-19		234.5	4.95228e-21					336.596	7.22583e-22		333.691	7.73924e-22		350	8.77e-22		348.72	8.93e-22
234.4	1.95403e-19		234.6	5.2069e-21					336.905	7.1138e-22		333.991	7.64069e-22		350.5	8.62e-22		349.21	8.81e-22
234.5	1.92794e-19		234.7	5.01594e-21					337.215	7.00484e-22		334.292	7.54654e-22		350.99	8.39e-22		349.7	8.68e-22
234.6	1.88529e-19		234.8	4.69767e-21					337.524	6.8984e-22		334.593	7.4537e-22		351.49	8.12e-22		350.2	8.57e-22
234.7	1.93175e-19		234.9	5.39786e-21					337.834	6.79486e-22		334.894	7.36492e-22		351.99	7.85e-22		350.69	8.45e-22
234.8	1.92093e-19		235	5.14324e-21					338.143	6.69727e-22		335.195	7.28026e-22		352.49	7.61e-22		351.19	8.34e-22
234.9	1.99796e-19		235.1	5.52517e-21					338.453	6.60423e-22		335.496	7.19635e-22		352.99	7.4e-22		351.69	8.23e-22
235	1.91075e-19		235.2	5.84344e-21					338.762	6.51843e-22		335.797	7.11675e-22		353.49	7.21e-22		352.19	8.13e-22
235.1	1.89229e-19		235.3	5.46151e-21					339.072	6.43878e-22		336.097	7.04246e-22		354	7.05e-22
235.2	1.9464e-19		235.4	5.27055e-21					339.381	6.36167e-22		336.398	6.96831e-22		354.5	6.91e-22
235.3	1.9273e-19		235.5	5.46151e-21					339.691	6.27932e-22		336.699	6.89373e-22		355.01	6.78e-22
235.4	1.90566e-19		235.6	5.97075e-21					340	6.20658e-22		337	6.81989e-22		355.52	6.66e-22
235.5	1.96931e-19		235.7	5.2069e-21						--					356.03	6.55e-22
235.6	1.85919e-19		235.8	6.0344e-21											356.54	6.45e-22
235.7	1.86874e-19		235.9	6.60729e-21											357.06	6.36e-22
235.8	1.9795e-19		236	5.84344e-21											357.57	6.27e-22
235.9	1.83564e-19		236.1	6.35267e-21											358.09	6.19e-22
236	1.99032e-19		236.2	6.16171e-21											358.61	6.11e-22
236.1	1.93112e-19		236.3	6.73459e-21											359.12	6.03e-22
236.2	1.94385e-19		236.4	6.73459e-21											359.65	5.95e-22
236.3	1.82291e-19		236.5	5.90709e-21											360.17	5.88e-22
236.4	1.89993e-19		236.6	6.54363e-21											360.69	5.81e-22
236.5	1.90884e-19		236.7	7.05286e-21											361.22	5.74e-22
236.6	1.80381e-19		236.8	6.60729e-21											361.74	5.68e-22
236.7	1.90375e-19		236.9	6.41632e-21											362.27	5.62e-22
236.8	1.8681e-19		237	7.11652e-21											362.8	5.55e-22
236.9	1.77708e-19		237.1	7.49844e-21											363.33	5.49e-22
237	1.90247e-19		237.2	7.49844e-21											363.87	5.43e-22
237.1	1.85537e-19		237.3	7.37113e-21											364.4	5.38e-22
237.2	1.80381e-19		237.4	6.60729e-21											364.94	5.32e-22
237.3	1.849e-19		237.5	7.49844e-21											365.48	5.27e-22
237.4	1.77644e-19		237.6	8.07133e-21
237.5	1.74589e-19		237.7	7.43479e-21
237.6	1.74461e-19		237.8	7.37113e-21
237.7	1.72679e-19		237.9	8.07133e-21
237.8	1.70706e-19		238	8.3896e-21
237.9	1.69687e-19		238.1	7.37113e-21
238	1.79235e-19		238.2	8.32594e-21
238.1	1.69624e-19		238.3	8.26229e-21
238.2	1.65231e-19		238.4	7.94402e-21
238.3	1.64659e-19		238.5	8.26229e-21
238.4	1.57529e-19		238.6	8.32594e-21
238.5	1.58038e-19		238.7	8.32594e-21
238.6	1.53328e-19		238.8	8.3896e-21
238.7	1.49509e-19		238.9	9.02614e-21
238.8	1.49191e-19		239	9.34441e-21
238.9	1.46517e-19		239.1	8.51691e-21
239	1.43589e-19		239.2	9.08979e-21
239.1	1.40406e-19		239.3	9.2171e-21
239.2	1.40088e-19		239.4	8.96248e-21
239.3	1.37669e-19		239.5	9.15345e-21
239.4	1.3455e-19		239.6	9.59902e-21
239.5	1.29203e-19		239.7	9.78999e-21
239.6	1.25702e-19		239.8	9.08979e-21
239.7	1.25257e-19		239.9	9.78999e-21
239.8	1.20228e-19		240	1.03629e-20
239.9	1.17491e-19		240.1	1.00446e-20
240	1.16281e-19		240.2	9.85364e-21
240.1	1.14054e-19		240.3	9.72633e-21
240.2	1.10744e-19		240.4	1.06811e-20
240.3	1.0737e-19		240.5	1.04902e-20
240.4	1.05524e-19		240.6	1.03629e-20
240.5	1.0336e-19		240.7	1.07448e-20
240.6	9.99857e-20		240.8	1.06175e-20
240.7	9.68667e-20		240.9	1.13813e-20
240.8	9.52117e-20		241	1.13813e-20
240.9	9.41296e-20		241.1	1.16996e-20
241	9.05013e-20		241.2	1.11904e-20
241.1	8.8719e-20		241.3	1.1636e-20
241.2	8.66821e-20		241.4	1.17633e-20
241.3	8.50271e-20		241.5	1.1636e-20
241.4	8.23536e-20		241.6	1.15723e-20
241.5	7.99347e-20		241.7	1.13813e-20
241.6	7.80888e-20		241.8	1.1636e-20
241.7	7.61155e-20		241.9	1.1254e-20
241.8	7.36966e-20		242	1.16996e-20
241.9	7.23599e-20		242.1	1.19542e-20
242	7.11505e-20		242.2	1.22088e-20
242.1	7.0323e-20		242.3	1.27817e-20
242.2	6.88589e-20		242.4	1.23361e-20
242.3	6.73312e-20		242.5	1.25908e-20
242.4	6.57399e-20		242.6	1.3291e-20
242.5	6.36393e-20		242.7	1.31636e-20
242.6	6.26208e-20		242.8	1.31636e-20
242.7	6.22389e-20		242.9	1.29727e-20
242.8	5.98837e-20		243	1.27817e-20
242.9	5.88653e-20		243.1	1.34183e-20
243	5.76558e-20		243.2	1.36729e-20
243.1	5.66374e-20		243.3	1.38638e-20
243.2	5.57462e-20		243.4	1.3291e-20
243.3	5.51733e-20		243.5	1.41185e-20
243.4	5.37729e-20		243.6	1.36729e-20
243.5	5.29454e-20		243.7	1.44367e-20
243.6	5.30091e-20		243.8	1.41821e-20
243.7	5.12268e-20		243.9	1.4755e-20
243.8	5.05902e-20		244	1.43731e-20
243.9	4.95718e-20		244.1	1.4755e-20
244	4.8617e-20		244.2	1.48823e-20
244.1	4.81077e-20		244.3	1.46277e-20
244.2	4.79168e-20		244.4	1.4755e-20
244.3	4.71529e-20		244.5	1.55188e-20
244.4	4.58162e-20		244.6	1.50096e-20
244.5	4.58798e-20		244.7	1.52006e-20
244.6	4.47341e-20		244.8	1.58371e-20
244.7	4.46704e-20		244.9	1.57098e-20
244.8	4.44795e-20		245	1.57735e-20
244.9	4.3652e-20		245.1	1.62827e-20
245	4.30154e-20		245.2	1.641e-20
245.1	4.26971e-20		245.3	1.6219e-20
245.2	4.20606e-20		245.4	1.60281e-20
245.3	4.17423e-20		245.5	1.67919e-20
245.4	4.09785e-20		245.6	1.69192e-20
245.5	4.05966e-20		245.7	1.70465e-20
245.6	4.06602e-20		245.8	1.71102e-20
245.7	4.02146e-20		245.9	1.69192e-20
245.8	4.04693e-20		246	1.71738e-20
245.9	3.89416e-20		246.1	1.73648e-20
246	3.87506e-20		246.2	1.76831e-20
246.1	3.91962e-20		246.3	1.8065e-20
246.2	3.93235e-20		246.4	1.74285e-20
246.3	3.8305e-20		246.5	1.80014e-20
246.4	3.86233e-20		246.6	1.79377e-20
246.5	3.78594e-20		246.7	1.83196e-20
246.6	3.76048e-20		246.8	1.87652e-20
246.7	3.79231e-20		246.9	1.83833e-20
246.8	3.69046e-20		247	1.87652e-20
246.9	3.76048e-20		247.1	1.93381e-20
247	3.75412e-20		247.2	1.9529e-20
247.1	3.69683e-20		247.3	1.92744e-20
247.2	3.73502e-20		247.4	1.94017e-20
247.3	3.71592e-20		247.5	1.972e-20
247.4	3.65227e-20		247.6	1.93381e-20
247.5	3.67137e-20		247.7	1.99746e-20
247.6	3.61408e-20		247.8	2.04839e-20
247.7	3.63954e-20		247.9	1.96564e-20
247.8	3.67137e-20		248	2.03565e-20
247.9	3.55679e-20		248.1	2.05475e-20
248	3.64591e-20		248.2	2.09294e-20
248.1	3.60135e-20		248.3	2.09931e-20
248.2	3.60771e-20		248.4	2.09294e-20
248.3	3.56952e-20		248.5	2.15023e-20
248.4	3.56316e-20		248.6	2.22025e-20
248.5	3.58862e-20		248.7	2.16296e-20
248.6	3.61408e-20		248.8	2.16296e-20
248.7	3.58225e-20		248.9	2.19479e-20
248.8	3.56316e-20		249	2.19479e-20
248.9	3.54406e-20		249.1	2.24571e-20
249	3.57589e-20		249.2	2.25208e-20
249.1	3.60771e-20		249.3	2.23298e-20
249.2	3.57589e-20		249.4	2.25208e-20
249.3	3.53769e-20		249.5	2.30937e-20
249.4	3.58862e-20		249.6	2.27117e-20
249.5	3.53133e-20		249.7	2.27754e-20
249.6	3.53133e-20		249.8	2.33483e-20
249.7	3.56952e-20		249.9	2.31573e-20
249.8	3.52496e-20		250	2.32846e-20
249.9	3.62044e-20		250.1	2.36666e-20
250	3.55042e-20		250.2	2.44941e-20
250.1	3.54406e-20		250.3	2.39848e-20
250.2	3.62044e-20		250.4	2.44304e-20
250.3	3.55679e-20		250.5	2.50669e-20
250.4	3.60771e-20		250.6	2.45577e-20
250.5	3.62044e-20		250.7	2.45577e-20
250.6	3.55679e-20		250.8	2.50033e-20
250.7	3.56316e-20		250.9	2.54489e-20
250.8	3.62681e-20		251	2.57035e-20
250.9	3.59498e-20		251.1	2.51306e-20
251	3.665e-20		251.2	2.61491e-20
251.1	3.56952e-20		251.3	2.54489e-20
251.2	3.65227e-20		251.4	2.60854e-20
251.3	3.63317e-20		251.5	2.62764e-20
251.4	3.64591e-20		251.6	2.6531e-20
251.5	3.61408e-20		251.7	2.6531e-20
251.6	3.62044e-20		251.8	2.69766e-20
251.7	3.665e-20		251.9	2.67856e-20
251.8	3.71592e-20		252	2.69129e-20
251.9	3.62044e-20		252.1	2.72948e-20
252	3.65227e-20		252.2	2.76768e-20
252.1	3.67137e-20		252.3	2.76768e-20
252.2	3.61408e-20		252.4	2.7995e-20
252.3	3.60135e-20		252.5	2.8186e-20
252.4	3.62681e-20		252.6	2.84406e-20
252.5	3.665e-20		252.7	2.86316e-20
252.6	3.69046e-20		252.8	2.90135e-20
252.7	3.69046e-20		252.9	2.88862e-20
252.8	3.72229e-20		253	2.92681e-20
252.9	3.67137e-20		253.1	2.97137e-20
253	3.65227e-20		253.2	2.93318e-20
253.1	3.71592e-20		253.3	2.92045e-20
253.2	3.70956e-20		253.4	3.0032e-20
253.3	3.72229e-20		253.5	3.01593e-20
253.4	3.70319e-20		253.6	3.06048e-20
253.5	3.73502e-20		253.7	3.04139e-20
253.6	3.70319e-20		253.8	3.07322e-20
253.7	3.76685e-20		253.9	3.10504e-20
253.8	3.79867e-20		254	3.1305e-20
253.9	3.79231e-20		254.1	3.08595e-20
254	3.80504e-20		254.2	3.11777e-20
254.1	3.78594e-20		254.3	3.1496e-20
254.2	3.81141e-20		254.4	3.18143e-20
254.3	3.88779e-20		254.5	3.25145e-20
254.4	3.85596e-20		254.6	3.22598e-20
254.5	3.85596e-20		254.7	3.23872e-20
254.6	3.84323e-20		254.8	3.19416e-20
254.7	3.88779e-20		254.9	3.23872e-20
254.8	3.8305e-20		255	3.3151e-20
254.9	3.86233e-20		255.1	3.32147e-20
255	3.85596e-20		255.2	3.32147e-20
255.1	3.93235e-20		255.3	3.32783e-20
255.2	3.87506e-20		255.4	3.35966e-20
255.3	3.95144e-20		255.5	3.35966e-20
255.4	3.92598e-20		255.6	3.39785e-20
255.5	3.89416e-20		255.7	3.45514e-20
255.6	3.91962e-20		255.8	3.44241e-20
255.7	3.95144e-20		255.9	3.42331e-20
255.8	3.97054e-20		256	3.53152e-20
255.9	3.93235e-20		256.1	3.53789e-20
256	4.05329e-20		256.2	3.49333e-20
256.1	4.0151e-20		256.3	3.54425e-20
256.2	3.98327e-20		256.4	3.50606e-20
256.3	4.06602e-20		256.5	3.60791e-20
256.4	3.97054e-20		256.6	3.55062e-20
256.5	4.00873e-20		256.7	3.63974e-20
256.6	4.02146e-20		256.8	3.6461e-20
256.7	4.05966e-20		256.9	3.58245e-20
256.8	4.05329e-20		257	3.67156e-20
256.9	4.02146e-20		257.1	3.61427e-20
257	4.11694e-20		257.2	3.70976e-20
257.1	4.04056e-20		257.3	3.69066e-20
257.2	4.14877e-20		257.4	3.69066e-20
257.3	4.08512e-20		257.5	3.72249e-20
257.4	4.05966e-20		257.6	3.8307e-20
257.5	4.11694e-20		257.7	3.79251e-20
257.6	4.15514e-20		257.8	3.79887e-20
257.7	4.17423e-20		257.9	3.89435e-20
257.8	4.23152e-20		258	3.82433e-20
257.9	4.17423e-20		258.1	3.86889e-20
258	4.1806e-20		258.2	3.85616e-20
258.1	4.19333e-20		258.3	3.93254e-20
258.2	4.18696e-20		258.4	3.91345e-20
258.3	4.28245e-20		258.5	3.97074e-20
258.4	4.23152e-20		258.6	3.93254e-20
258.5	4.28881e-20		258.7	3.94527e-20
258.6	4.25698e-20		258.8	4.06622e-20
258.7	4.28881e-20		258.9	3.9962e-20
258.8	4.33973e-20		259	4.00893e-20
258.9	4.30791e-20		259.1	4.07258e-20
259	4.32064e-20		259.2	4.09804e-20
259.1	4.33973e-20		259.3	4.15533e-20
259.2	4.32064e-20		259.4	4.1426e-20
259.3	4.40975e-20		259.5	4.1617e-20
259.4	4.39066e-20		259.6	4.18716e-20
259.5	4.43521e-20		259.7	4.10441e-20
259.6	4.39066e-20		259.8	4.1617e-20
259.7	4.3652e-20		259.9	4.29537e-20
259.8	4.44795e-20		260	4.28901e-20
259.9	4.44795e-20		260.1	4.26991e-20
260	4.4925e-20		260.2	4.21899e-20
260.1	4.46704e-20		260.3	4.39722e-20
260.2	4.46068e-20		260.4	4.33356e-20
260.3	4.51797e-20		260.5	4.31447e-20
260.4	4.45431e-20		260.6	4.37176e-20
260.5	4.44158e-20		260.7	4.31447e-20
260.6	4.58798e-20		260.8	4.43541e-20
260.7	4.58798e-20		260.9	4.44814e-20
260.8	4.51797e-20		261	4.48633e-20
260.9	4.57525e-20		261.1	4.42268e-20
261	4.6771e-20		261.2	4.51816e-20
261.1	4.62618e-20		261.3	4.53089e-20
261.2	4.64527e-20		261.4	4.51816e-20
261.3	4.58162e-20		261.5	4.50543e-20
261.4	4.70893e-20		261.6	4.60091e-20
261.5	4.68983e-20		261.7	4.5118e-20
261.6	4.70893e-20		261.8	4.56272e-20
261.7	4.79168e-20		261.9	4.60728e-20
261.8	4.74075e-20		262	4.60091e-20
261.9	4.72166e-20		262.1	4.67093e-20
262	4.79168e-20		262.2	4.68366e-20
262.1	4.80441e-20		262.3	4.60728e-20
262.2	4.8235e-20		262.4	4.6582e-20
262.3	4.85533e-20		262.5	4.71549e-20
262.4	4.81714e-20		262.6	4.76641e-20
262.5	4.79168e-20		262.7	4.72822e-20
262.6	4.85533e-20		262.8	4.70276e-20
262.7	4.84897e-20		262.9	4.78551e-20
262.8	4.93172e-20		263	4.71549e-20
262.9	4.97627e-20		263.1	4.79824e-20
263	4.89989e-20		263.2	4.76641e-20
263.1	4.94445e-20		263.3	4.81733e-20
263.2	4.91899e-20		263.4	4.90645e-20
263.3	5.00174e-20		263.5	4.87462e-20
263.4	5.08449e-20		263.6	4.84916e-20
263.5	5.04629e-20		263.7	4.90008e-20
263.6	5.07175e-20		263.8	4.93828e-20
263.7	5.03993e-20		263.9	4.90645e-20
263.8	5.07812e-20		264	5.03376e-20
263.9	5.13541e-20		264.1	4.97647e-20
264	5.08449e-20		264.2	5.04012e-20
264.1	5.17997e-20		264.3	4.99557e-20
264.2	5.16724e-20		264.4	4.95101e-20
264.3	5.18633e-20		264.5	5.02739e-20
264.4	5.23726e-20		264.6	5.07195e-20
264.5	5.23726e-20		264.7	5.12924e-20
264.6	5.21179e-20		264.8	5.10378e-20
264.7	5.26908e-20		264.9	5.07832e-20
264.8	5.30091e-20		265	5.21199e-20
264.9	5.32001e-20		265.1	5.14197e-20
265	5.26908e-20		265.2	5.1356e-20
265.1	5.3582e-20		265.3	5.21835e-20
265.2	5.32001e-20		265.4	5.22472e-20
265.3	5.45368e-20		265.5	5.26291e-20
265.4	5.40912e-20		265.6	5.24382e-20
265.5	5.38366e-20		265.7	5.18653e-20
265.6	5.42822e-20		265.8	5.28201e-20
265.7	5.40912e-20		265.9	5.32657e-20
265.8	5.37093e-20		266	5.30747e-20
265.9	5.44095e-20		266.1	5.33293e-20
266	5.51097e-20		266.2	5.39022e-20
266.1	5.49824e-20		266.3	5.3393e-20
266.2	5.53643e-20		266.4	5.46661e-20
266.3	5.60645e-20		266.5	5.37112e-20
266.4	5.56189e-20		266.6	5.35839e-20
266.5	5.48551e-20		266.7	5.53026e-20
266.6	5.57462e-20		266.8	5.51116e-20
266.7	5.58735e-20		266.9	5.46024e-20
266.8	5.60008e-20		267	5.4857e-20
266.9	5.55553e-20		267.1	5.56845e-20
267	5.66374e-20		267.2	5.55572e-20
267.1	5.61918e-20		267.3	5.54936e-20
267.2	5.62554e-20		267.4	5.55572e-20
267.3	5.70193e-20		267.5	5.61937e-20
267.4	5.70193e-20		267.6	5.59391e-20
267.5	5.71466e-20		267.7	5.62574e-20
267.6	5.79104e-20		267.8	5.54936e-20
267.7	5.86106e-20		267.9	5.63847e-20
267.8	5.78468e-20		268	5.64484e-20
267.9	5.89289e-20		268.1	5.66393e-20
268	5.88653e-20		268.2	5.6512e-20
268.1	5.89926e-20		268.3	5.72122e-20
268.2	5.91199e-20		268.4	5.74668e-20
268.3	5.88016e-20		268.5	5.71486e-20
268.4	5.93745e-20		268.6	5.73395e-20
268.5	5.93745e-20		268.7	5.72759e-20
268.6	5.95018e-20		268.8	5.71486e-20
268.7	5.90562e-20		268.9	5.79124e-20
268.8	6.03293e-20		269	5.69576e-20
268.9	6.00747e-20		269.1	5.76578e-20
269	6.07112e-20		269.2	5.75305e-20
269.1	6.14114e-20		269.3	5.70849e-20
269.2	6.11568e-20		269.4	5.75941e-20
269.3	6.12205e-20		269.5	5.75941e-20
269.4	6.10295e-20		269.6	5.82943e-20
269.5	6.1666e-20		269.7	5.84853e-20
269.6	6.1857e-20		269.8	5.86763e-20
269.7	6.13478e-20		269.9	5.80397e-20
269.8	6.09022e-20		270	5.79124e-20
269.9	6.30664e-20		270.1	5.87399e-20
270	6.22389e-20		270.2	5.89309e-20
270.1	6.31301e-20		270.3	5.93764e-20
270.2	6.31937e-20		270.4	5.86126e-20
270.3	6.39576e-20		270.5	5.88036e-20
270.4	6.35757e-20		270.6	5.82307e-20
270.5	6.36393e-20		270.7	5.88672e-20
270.6	6.34483e-20		270.8	5.92491e-20
270.7	6.31301e-20		270.9	5.91855e-20
270.8	6.45305e-20		271	5.91218e-20
270.9	6.33847e-20		271.1	5.95038e-20
271	6.47214e-20		271.2	5.96311e-20
271.1	6.39576e-20		271.3	6.03313e-20
271.2	6.56762e-20		271.4	5.98857e-20
271.3	6.46578e-20		271.5	5.96311e-20
271.4	6.5167e-20		271.6	6.08405e-20
271.5	6.5358e-20		271.7	6.0204e-20
271.6	6.61218e-20		271.8	6.09041e-20
271.7	6.47851e-20		271.9	6.03313e-20
271.8	6.59945e-20		272	6.06495e-20
271.9	6.55489e-20		272.1	6.12224e-20
272	6.6631e-20		272.2	6.12861e-20
272.1	6.65037e-20		272.3	6.06495e-20
272.2	6.63128e-20		272.4	6.12861e-20
272.3	6.62491e-20		272.5	6.1477e-20
272.4	6.6822e-20		272.6	6.16043e-20
272.5	6.7013e-20		272.7	6.1477e-20
272.6	6.66947e-20		272.8	6.22409e-20
272.7	6.77768e-20		272.9	6.10315e-20
272.8	6.69493e-20		273	6.20499e-20
272.9	6.74585e-20		273.1	6.14134e-20
273	6.7013e-20		273.2	6.19863e-20
273.1	6.82224e-20		273.3	6.17316e-20
273.2	6.80951e-20		273.4	6.1668e-20
273.3	6.75859e-20		273.5	6.25591e-20
273.4	6.83497e-20		273.6	6.15407e-20
273.5	6.82861e-20		273.7	6.17953e-20
273.6	6.87953e-20		273.8	6.23045e-20
273.7	6.88589e-20		273.9	6.30047e-20
273.8	6.91136e-20		274	6.27501e-20
273.9	6.8668e-20		274.1	6.33867e-20
274	6.96864e-20		274.2	6.21136e-20
274.1	6.89862e-20		274.3	6.23682e-20
274.2	6.91136e-20		274.4	6.25591e-20
274.3	6.93045e-20		274.5	6.28774e-20
274.4	6.91136e-20		274.6	6.26228e-20
274.5	6.96228e-20		274.7	6.24318e-20
274.6	7.01957e-20		274.8	6.36413e-20
274.7	7.0132e-20		274.9	6.38322e-20
274.8	6.96228e-20		275	6.35776e-20
274.9	7.00047e-20		275.1	6.3514e-20
275	7.05139e-20		275.2	6.3323e-20
275.1	7.0132e-20		275.3	6.3132e-20
275.2	7.07049e-20		275.4	6.3323e-20
275.3	7.07049e-20		275.5	6.34503e-20
275.4	7.04503e-20		275.6	6.42778e-20
275.5	7.06412e-20		275.7	6.26865e-20
275.6	7.14051e-20		275.8	6.37686e-20
275.7	7.04503e-20		275.9	6.3514e-20
275.8	7.08959e-20		276	6.36413e-20
275.9	7.12778e-20		276.1	6.43415e-20
276	7.19143e-20		276.2	6.3132e-20
276.1	7.16597e-20		276.3	6.3323e-20
276.2	7.1787e-20		276.4	6.33867e-20
276.3	7.15961e-20		276.5	6.38959e-20
276.4	7.19143e-20		276.6	6.37049e-20
276.5	7.27418e-20		276.7	6.43415e-20
276.6	7.11505e-20		276.8	6.31957e-20
276.7	7.21053e-20		276.9	6.32593e-20
276.8	7.20416e-20		277	6.37686e-20
276.9	7.27418e-20		277.1	6.3514e-20
277	7.28691e-20		277.2	6.37049e-20
277.1	7.21053e-20		277.3	6.42142e-20
277.2	7.24236e-20		277.4	6.37049e-20
277.3	7.24872e-20		277.5	6.42142e-20
277.4	7.33147e-20		277.6	6.41505e-20
277.5	7.35693e-20		277.7	6.37686e-20
277.6	7.36966e-20		277.8	6.42142e-20
277.7	7.47151e-20		277.9	6.28774e-20
277.8	7.43332e-20		278	6.4787e-20
277.9	7.39513e-20		278.1	6.41505e-20
278	7.46515e-20		278.2	6.37686e-20
278.1	7.51607e-20		278.3	6.39595e-20
278.2	7.60518e-20		278.4	6.31957e-20
278.3	7.50334e-20		278.5	6.40232e-20
278.4	7.45878e-20		278.6	6.38959e-20
278.5	7.51607e-20		278.7	6.38959e-20
278.6	7.53516e-20		278.8	6.44688e-20
278.7	7.56699e-20		278.9	6.44051e-20
278.8	7.56699e-20		279	6.32593e-20
278.9	7.57972e-20		279.1	6.40868e-20
279	7.57972e-20		279.2	6.41505e-20
279.1	7.56699e-20		279.3	6.44051e-20
279.2	7.50334e-20		279.4	6.30684e-20
279.3	7.68793e-20		279.5	6.34503e-20
279.4	7.61791e-20		279.6	6.46597e-20
279.5	7.55426e-20		279.7	6.43415e-20
279.6	7.72613e-20		279.8	6.40868e-20
279.7	7.55426e-20		279.9	6.48507e-20
279.8	7.6752e-20		280	6.47234e-20
279.9	7.71976e-20		280.1	6.39595e-20
280	7.63065e-20		280.2	6.31957e-20
280.1	7.68157e-20		280.3	6.3514e-20
280.2	7.75159e-20		280.4	6.36413e-20
280.3	7.73886e-20		280.5	6.42142e-20
280.4	7.75795e-20		280.6	6.35776e-20
280.5	7.6752e-20		280.7	6.36413e-20
280.6	7.82797e-20		280.8	6.27501e-20
280.7	7.74522e-20		280.9	6.34503e-20
280.8	7.6943e-20		281	6.36413e-20
280.9	7.76432e-20		281.1	6.33867e-20
281	7.74522e-20		281.2	6.3323e-20
281.1	7.70066e-20		281.3	6.3514e-20
281.2	7.77705e-20		281.4	6.34503e-20
281.3	7.82161e-20		281.5	6.3323e-20
281.4	7.77705e-20		281.6	6.3132e-20
281.5	7.78342e-20		281.7	6.25591e-20
281.6	7.87253e-20		281.8	6.28138e-20
281.7	7.73886e-20		281.9	6.3514e-20
281.8	7.8789e-20		282	6.37049e-20
281.9	7.77068e-20		282.1	6.31957e-20
282	7.87253e-20		282.2	6.26228e-20
282.1	7.73886e-20		282.3	6.3323e-20
282.2	7.8598e-20		282.4	6.25591e-20
282.3	7.87253e-20		282.5	6.26865e-20
282.4	7.78978e-20		282.6	6.1859e-20
282.5	7.87253e-20		282.7	6.21772e-20
282.6	7.78978e-20		282.8	6.27501e-20
282.7	7.68793e-20		282.9	6.30684e-20
282.8	7.81524e-20		283	6.28774e-20
282.9	7.8407e-20		283.1	6.30047e-20
283	7.88526e-20		283.2	6.1859e-20
283.1	7.8598e-20		283.3	6.19863e-20
283.2	7.8598e-20		283.4	6.21772e-20
283.3	7.92982e-20		283.5	6.19863e-20
283.4	7.91709e-20		283.6	6.21136e-20
283.5	7.86617e-20		283.7	6.27501e-20
283.6	7.87253e-20		283.8	6.10951e-20
283.7	7.87253e-20		283.9	6.16043e-20
283.8	7.85343e-20		284	6.26865e-20
283.9	7.92345e-20		284.1	6.17316e-20
284	7.92345e-20		284.2	6.15407e-20
284.1	7.87253e-20		284.3	6.21136e-20
284.2	7.89163e-20		284.4	6.10951e-20
284.3	7.93618e-20		284.5	6.08405e-20
284.4	7.85343e-20		284.6	6.12861e-20
284.5	7.88526e-20		284.7	6.09678e-20
284.6	7.92982e-20		284.8	6.05222e-20
284.7	7.91072e-20		284.9	6.0204e-20
284.8	7.95528e-20		285	6.12224e-20
284.9	7.93618e-20		285.1	6.10951e-20
285	7.99984e-20		285.2	5.92491e-20
285.1	7.91072e-20		285.3	6.09678e-20
285.2	7.94892e-20		285.4	5.98857e-20
285.3	7.96801e-20		285.5	6.09678e-20
285.4	7.94892e-20		285.6	6.03949e-20
285.5	7.91709e-20		285.7	6.02676e-20
285.6	7.99347e-20		285.8	5.99493e-20
285.7	7.88526e-20		285.9	5.96947e-20
285.8	7.96165e-20		286	6.00766e-20
285.9	7.88526e-20		286.1	5.90582e-20
286	7.98074e-20		286.2	5.96311e-20
286.1	7.96801e-20		286.3	5.96947e-20
286.2	8.12078e-20		286.4	5.95038e-20
286.3	7.99347e-20		286.5	6.00766e-20
286.4	8.01893e-20		286.6	5.98857e-20
286.5	7.89799e-20		286.7	5.85489e-20
286.6	7.96801e-20		286.8	5.93128e-20
286.7	7.92345e-20		286.9	5.88672e-20
286.8	8.01257e-20		287	5.86126e-20
286.9	7.98074e-20		287.1	5.88672e-20
287	7.96801e-20		287.2	5.89309e-20
287.1	7.98711e-20		287.3	5.89309e-20
287.2	7.87253e-20		287.4	5.89945e-20
287.3	7.89799e-20		287.5	5.87399e-20
287.4	7.97438e-20		287.6	5.77851e-20
287.5	7.87253e-20		287.7	5.75941e-20
287.6	7.94255e-20		287.8	5.82307e-20
287.7	7.91072e-20		287.9	5.74668e-20
287.8	7.88526e-20		288	5.79761e-20
287.9	7.90436e-20		288.1	5.80397e-20
288	7.98711e-20		288.2	5.8167e-20
288.1	7.99984e-20		288.3	5.80397e-20
288.2	7.92345e-20		288.4	5.75941e-20
288.3	7.99984e-20		288.5	5.79124e-20
288.4	7.99984e-20		288.6	5.77851e-20
288.5	8.01257e-20		288.7	5.62574e-20
288.6	7.89799e-20		288.8	5.65757e-20
288.7	8.0253e-20		288.9	5.71486e-20
288.8	7.91709e-20		289	5.6703e-20
288.9	7.89163e-20		289.1	5.56845e-20
289	7.93618e-20		289.2	5.66393e-20
289.1	7.96165e-20		289.3	5.68939e-20
289.2	7.92345e-20		289.4	5.58118e-20
289.3	7.78342e-20		289.5	5.60664e-20
289.4	7.94892e-20		289.6	5.60028e-20
289.5	7.91709e-20		289.7	5.46024e-20
289.6	7.96801e-20		289.8	5.54936e-20
289.7	7.85343e-20		289.9	5.53662e-20
289.8	7.80251e-20		290	5.5048e-20
289.9	7.84707e-20		290.1	5.56845e-20
290	7.86617e-20		290.2	5.53026e-20
290.1	7.8407e-20		290.3	5.49207e-20
290.2	7.75159e-20		290.4	5.43478e-20
290.3	7.92982e-20		290.5	5.46024e-20
290.4	7.76432e-20		290.6	5.39022e-20
290.5	7.85343e-20		290.7	5.43478e-20
290.6	7.73886e-20		290.8	5.3393e-20
290.7	7.81524e-20		290.9	5.26928e-20
290.8	7.86617e-20		291	5.39022e-20
290.9	7.78978e-20		291.1	5.28201e-20
291	7.82797e-20		291.2	5.3202e-20
291.1	7.73886e-20		291.3	5.20562e-20
291.2	7.77068e-20		291.4	5.25655e-20
291.3	7.80888e-20		291.5	5.25655e-20
291.4	7.80888e-20		291.6	5.25655e-20
291.5	7.78342e-20		291.7	5.11014e-20
291.6	7.76432e-20		291.8	5.18016e-20
291.7	7.77705e-20		291.9	5.1547e-20
291.8	7.73886e-20		292	5.09741e-20
291.9	7.64974e-20		292.1	5.14834e-20
292	7.6752e-20		292.2	5.14834e-20
292.1	7.66247e-20		292.3	5.08468e-20
292.2	7.63701e-20		292.4	5.16743e-20
292.3	7.63065e-20		292.5	5.05285e-20
292.4	7.72613e-20		292.6	5.02739e-20
292.5	7.7134e-20		292.7	5.01466e-20
292.6	7.61155e-20		292.8	4.91282e-20
292.7	7.68157e-20		292.9	5.00193e-20
292.8	7.59882e-20		293	4.90008e-20
292.9	7.61791e-20		293.1	5.03376e-20
293	7.59882e-20		293.2	4.90645e-20
293.1	7.65611e-20		293.3	4.90008e-20
293.2	7.58609e-20		293.4	4.86189e-20
293.3	7.64974e-20		293.5	4.84916e-20
293.4	7.63701e-20		293.6	4.77914e-20
293.5	7.56699e-20		293.7	4.90645e-20
293.6	7.52243e-20		293.8	4.79187e-20
293.7	7.61155e-20		293.9	4.8237e-20
293.8	7.59245e-20		294	4.77278e-20
293.9	7.5288e-20		294.1	4.75368e-20
294	7.59882e-20		294.2	4.72822e-20
294.1	7.56063e-20		294.3	4.70276e-20
294.2	7.47788e-20		294.4	4.6582e-20
294.3	7.42059e-20		294.5	4.62637e-20
294.4	7.52243e-20		294.6	4.69003e-20
294.5	7.47151e-20		294.7	4.70912e-20
294.6	7.40786e-20		294.8	4.62001e-20
294.7	7.44605e-20		294.9	4.6391e-20
294.8	7.45241e-20		295	4.57545e-20
294.9	7.42695e-20		295.1	4.57545e-20
295	7.48424e-20		295.2	4.57545e-20
295.1	7.36966e-20		295.3	4.53726e-20
295.2	7.3442e-20		295.4	4.49906e-20
295.3	7.31874e-20		295.5	4.50543e-20
295.4	7.38876e-20		295.6	4.56908e-20
295.5	7.30601e-20		295.7	4.57545e-20
295.6	7.38239e-20		295.8	4.5118e-20
295.7	7.25509e-20		295.9	4.4736e-20
295.8	7.35693e-20		296	4.43541e-20
295.9	7.31238e-20		296.1	4.42268e-20
296	7.24872e-20		296.2	4.37176e-20
296.1	7.17234e-20		296.3	4.38449e-20
296.2	7.24236e-20		296.4	4.41631e-20
296.3	7.15961e-20		296.5	4.3463e-20
296.4	7.19143e-20		296.6	4.26354e-20
296.5	7.14051e-20		296.7	4.26991e-20
296.6	7.17234e-20		296.8	4.27628e-20
296.7	7.18507e-20		296.9	4.21262e-20
296.8	7.15324e-20		297	4.26354e-20
296.9	7.06412e-20		297.1	4.19989e-20
297	7.08322e-20		297.2	4.22535e-20
297.1	7.05776e-20		297.3	4.19353e-20
297.2	6.96864e-20		297.4	4.19353e-20
297.3	6.99411e-20		297.5	4.16806e-20
297.4	7.03866e-20		297.6	4.11078e-20
297.5	6.96228e-20		297.7	4.11714e-20
297.6	6.90499e-20		297.8	4.12987e-20
297.7	6.94318e-20		297.9	4.11714e-20
297.8	6.95591e-20		298	4.10441e-20
297.9	6.80314e-20		298.1	4.11714e-20
298	6.86043e-20		298.2	4.07258e-20
298.1	6.8477e-20		298.3	4.02166e-20
298.2	6.84134e-20		298.4	3.95164e-20
298.3	6.73312e-20		298.5	3.92618e-20
298.4	6.77768e-20		298.6	3.9771e-20
298.5	6.67584e-20		298.7	3.92618e-20
298.6	6.6631e-20		298.8	3.90072e-20
298.7	6.54853e-20		298.9	3.87526e-20
298.8	6.65037e-20		299	3.91981e-20
298.9	6.59945e-20		299.1	3.90708e-20
299	6.65674e-20		299.2	3.85616e-20
299.1	6.52307e-20		299.3	3.84979e-20
299.2	6.4976e-20		299.4	3.79887e-20
299.3	6.52307e-20		299.5	3.73522e-20
299.4	6.47214e-20		299.6	3.76704e-20
299.5	6.39576e-20		299.7	3.74795e-20
299.6	6.44668e-20		299.8	3.70339e-20
299.7	6.38939e-20		299.9	3.68429e-20
299.8	6.35757e-20		300	3.74795e-20
299.9	6.3703e-20		300.1	3.61427e-20
300	6.34483e-20		300.2	3.61427e-20
300.1	6.3512e-20		300.3	3.627e-20
300.2	6.27482e-20		300.4	3.56335e-20
300.3	6.28755e-20		300.5	3.58881e-20
300.4	6.17933e-20		300.6	3.56335e-20
300.5	6.21753e-20		300.7	3.44877e-20
300.6	6.17933e-20		300.8	3.4806e-20
300.7	6.09022e-20		300.9	3.39149e-20
300.8	6.30028e-20		301	3.35966e-20
300.9	6.12841e-20		301.1	3.41058e-20
301	6.12205e-20		301.2	3.44241e-20
301.1	6.1666e-20		301.3	3.36602e-20
301.2	6.03293e-20		301.4	3.32147e-20
301.3	6.03293e-20		301.5	3.26418e-20
301.4	6.0393e-20		301.6	3.26418e-20
301.5	6.08385e-20		301.7	3.27691e-20
301.6	6.0011e-20		301.8	3.27054e-20
301.7	6.05839e-20		301.9	3.27691e-20
301.8	5.99474e-20		302	3.17506e-20
301.9	5.96928e-20		302.1	3.19416e-20
302	5.91199e-20		302.2	3.17506e-20
302.1	5.93108e-20		302.3	3.07958e-20
302.2	5.93745e-20		302.4	3.11777e-20
302.3	5.84833e-20		302.5	3.06048e-20
302.4	5.86106e-20		302.6	2.97137e-20
302.5	5.86106e-20		302.7	2.9841e-20
302.6	5.81014e-20		302.8	3.00956e-20
302.7	5.73376e-20		302.9	2.965e-20
302.8	5.79741e-20		303	2.93954e-20
302.9	5.80378e-20		303.1	2.92681e-20
303	5.76558e-20		303.2	2.90135e-20
303.1	5.77831e-20		303.3	2.91408e-20
303.2	5.70193e-20		303.4	2.86952e-20
303.3	5.70193e-20		303.5	2.87589e-20
303.4	5.70829e-20		303.6	2.8186e-20
303.5	5.72103e-20		303.7	2.85679e-20
303.6	5.60008e-20		303.8	2.77404e-20
303.7	5.60008e-20		303.9	2.76131e-20
303.8	5.54916e-20		304	2.76131e-20
303.9	5.49187e-20		304.1	2.72312e-20
304	5.54279e-20		304.2	2.71039e-20
304.1	5.53643e-20		304.3	2.66583e-20
304.2	5.46641e-20		304.4	2.64037e-20
304.3	5.44731e-20		304.5	2.64673e-20
304.4	5.51733e-20		304.6	2.6531e-20
304.5	5.41549e-20		304.7	2.59581e-20
304.6	5.46004e-20		304.8	2.60854e-20
304.7	5.38366e-20		304.9	2.52579e-20
304.8	5.38366e-20		305	2.50669e-20
304.9	5.41549e-20		305.1	2.51306e-20
305	5.38366e-20		305.2	2.55762e-20
305.1	5.23726e-20		305.3	2.4685e-20
305.2	5.29454e-20		305.4	2.48123e-20
305.3	5.16724e-20		305.5	2.4685e-20
305.4	5.32001e-20		305.6	2.41758e-20
305.5	5.1736e-20		305.7	2.41121e-20
305.6	5.18633e-20		305.8	2.39848e-20
305.7	5.26272e-20		305.9	2.37939e-20
305.8	5.16724e-20		306	2.41121e-20
305.9	5.12904e-20		306.1	2.38575e-20
306	5.12904e-20		306.2	2.29027e-20
306.1	5.11631e-20		306.3	2.303e-20
306.2	5.07175e-20		306.4	2.31573e-20
306.3	4.989e-20		306.5	2.33483e-20
306.4	4.989e-20		306.6	2.24571e-20
306.5	4.95718e-20		306.7	2.23935e-20
306.6	4.88716e-20		306.8	2.25844e-20
306.7	4.89352e-20		306.9	2.20116e-20
306.8	4.85533e-20		307	2.22662e-20
306.9	4.82987e-20		307.1	2.09931e-20
307	4.77895e-20		307.2	2.12477e-20
307.1	4.75985e-20		307.3	2.09294e-20
307.2	4.68983e-20		307.4	2.10567e-20
307.3	4.64527e-20		307.5	2.1375e-20
307.4	4.66437e-20		307.6	2.11204e-20
307.5	4.60708e-20		307.7	2.02292e-20
307.6	4.58798e-20		307.8	2.06748e-20
307.7	4.59435e-20		307.9	2.08658e-20
307.8	4.59435e-20		308	2.02292e-20
307.9	4.5116e-20		308.1	1.98473e-20
308	4.45431e-20		308.2	1.98473e-20
308.1	4.40975e-20		308.3	1.91471e-20
308.2	4.40339e-20		308.4	1.95927e-20
308.3	4.33973e-20		308.5	1.95927e-20
308.4	4.30154e-20		308.6	1.95927e-20
308.5	4.32064e-20		308.7	1.87015e-20
308.6	4.21243e-20		308.8	1.8256e-20
308.7	4.22516e-20		308.9	1.8256e-20
308.8	4.17423e-20		309	1.81287e-20
308.9	4.15514e-20		309.1	1.78104e-20
309	4.10421e-20		309.2	1.76831e-20
309.1	4.07875e-20		309.3	1.73012e-20
309.2	4.08512e-20		309.4	1.81287e-20
309.3	3.97054e-20		309.5	1.69829e-20
309.4	3.98964e-20		309.6	1.76831e-20
309.5	3.87506e-20		309.7	1.72375e-20
309.6	3.91325e-20		309.8	1.64737e-20
309.7	3.84323e-20		309.9	1.69829e-20
309.8	3.87506e-20		310	1.64737e-20
309.9	3.86869e-20		310.1	1.641e-20
310	3.82414e-20		310.2	1.58371e-20
310.1	3.79231e-20		310.3	1.58371e-20
310.2	3.69683e-20		310.4	1.56462e-20
310.3	3.76685e-20		310.5	1.57098e-20
310.4	3.64591e-20		310.6	1.62827e-20
310.5	3.59498e-20		310.7	1.52642e-20
310.6	3.61408e-20		310.8	1.4755e-20
310.7	3.63954e-20		310.9	1.45004e-20
310.8	3.56316e-20		311	1.50096e-20
310.9	3.52496e-20		311.1	1.38638e-20
311	3.45494e-20		311.2	1.48823e-20
311.1	3.37856e-20		311.3	1.44367e-20
311.2	3.44858e-20		311.4	1.39911e-20
311.3	3.44858e-20		311.5	1.38638e-20
311.4	3.29581e-20		311.6	1.38002e-20
311.5	3.37219e-20		311.7	1.34819e-20
311.6	3.34673e-20		311.8	1.35456e-20
311.7	3.23215e-20		311.9	1.31e-20
311.8	3.28944e-20		312	1.27181e-20
311.9	3.19396e-20		312.1	1.22725e-20
312	3.16213e-20		312.2	1.20815e-20
312.1	3.19396e-20		312.3	1.20815e-20
312.2	3.13031e-20		312.4	1.21452e-20
312.3	3.05392e-20		312.5	1.18906e-20
312.4	3.06029e-20		312.6	1.22088e-20
312.5	3.06665e-20		312.7	1.15086e-20
312.6	3.01573e-20		312.8	1.11904e-20
312.7	2.99663e-20		312.9	1.11904e-20
312.8	3.003e-20		313	1.1254e-20
312.9	3.00937e-20		313.1	1.09994e-20
313	2.94571e-20		313.2	1.15086e-20
313.1	2.88206e-20		313.3	1.09358e-20
313.2	2.92025e-20		313.4	1.01719e-20
313.3	2.86933e-20		313.5	1.05538e-20
313.4	2.84386e-20		313.6	1.05538e-20
313.5	2.83113e-20		313.7	1.00446e-20
313.6	2.78021e-20		313.8	1.05538e-20
313.7	2.80567e-20		313.9	9.66268e-21
313.8	2.83113e-20		314	1.01719e-20
313.9	2.71019e-20		314.1	9.85364e-21
314	2.74838e-20		314.2	9.59902e-21
314.1	2.71019e-20		314.3	9.59902e-21
314.2	2.672e-20		314.4	9.15345e-21
314.3	2.60198e-20		314.5	8.83518e-21
314.4	2.65927e-20		314.6	8.77152e-21
314.5	2.58925e-20		314.7	9.40806e-21
314.6	2.58288e-20		314.8	8.96248e-21
314.7	2.61471e-20		314.9	8.58056e-21
314.8	2.60198e-20		315	8.58056e-21
314.9	2.57015e-20		315.1	8.00767e-21
315	2.53833e-20		315.2	8.96248e-21
315.1	2.52559e-20		315.3	8.58056e-21
315.2	2.5065e-20		315.4	8.00767e-21
315.3	2.43648e-20		315.5	8.26229e-21
315.4	2.47467e-20		315.6	7.49844e-21
315.5	2.50013e-20		315.7	7.81671e-21
315.6	2.38556e-20		315.8	7.5621e-21
315.7	2.40465e-20		315.9	7.75306e-21
315.8	2.37283e-20		316	7.05286e-21
315.9	2.36009e-20		316.1	7.75306e-21
316	2.30281e-20		316.2	7.81671e-21
316.1	2.341e-20		316.3	6.8619e-21
316.2	2.26461e-20		316.4	6.92556e-21
316.3	2.22006e-20		316.5	6.92556e-21
316.4	2.25188e-20		316.6	6.41632e-21
316.5	2.1755e-20		316.7	6.22536e-21
316.6	2.15004e-20		316.8	6.16171e-21
316.7	2.15004e-20		316.9	6.92556e-21
316.8	2.13094e-20		317	6.28902e-21
316.9	2.10548e-20		317.1	6.35267e-21
317	2.06729e-20		317.2	6.16171e-21
317.1	2.08002e-20		317.3	6.22536e-21
317.2	2.04819e-20		317.4	5.58882e-21
317.3	1.98454e-20		317.5	5.33421e-21
317.4	1.96544e-20		317.6	5.58882e-21
317.5	1.94634e-20		317.7	6.22536e-21
317.6	1.9909e-20		317.8	5.2069e-21
317.7	1.99727e-20		317.9	5.71613e-21
317.8	1.90815e-20		318	6.09805e-21
317.9	1.90179e-20		318.1	5.2069e-21
318	1.94634e-20		318.2	5.07959e-21
318.1	1.88269e-20		318.3	5.58882e-21
318.2	1.8063e-20		318.4	5.65248e-21
318.3	1.88905e-20		318.5	5.01594e-21
318.4	1.8445e-20		318.6	5.07959e-21
318.5	1.76811e-20		318.7	4.76132e-21
318.6	1.8063e-20		318.8	5.27055e-21
318.7	1.71082e-20		318.9	4.63401e-21
318.8	1.75538e-20		319	4.69767e-21
318.9	1.62807e-20		319.1	4.57036e-21
319	1.61534e-20		319.2	4.12478e-21
319.1	1.59625e-20		319.3	4.25209e-21
319.2	1.62171e-20		319.4	4.18843e-21
319.3	1.60898e-20		319.5	3.36093e-21
319.4	1.48803e-20		319.6	4.3794e-21
319.5	1.51986e-20		319.7	4.3794e-21
319.6	1.51986e-20		319.8	3.36093e-21
319.7	1.53259e-20		319.9	3.87016e-21
319.8	1.4753e-20		320	3.99747e-21
319.9	1.50713e-20		320.1	3.23362e-21
320	1.4944e-20		320.2	3.61555e-21
320.1	1.39892e-20		320.3	2.72439e-21
320.2	1.35436e-20		320.4	3.10632e-21
320.3	1.40528e-20		320.5	3.48824e-21
320.4	1.33527e-20		320.6	2.8517e-21
320.5	1.31617e-20		320.7	2.97901e-21
320.6	1.29707e-20		320.8	3.10632e-21
320.7	1.34163e-20		320.9	2.8517e-21
320.8	1.22069e-20		321	3.16997e-21
320.9	1.23342e-20		321.1	2.78805e-21
321	1.25251e-20		321.2	2.8517e-21
321.1	1.20796e-20		321.3	2.91535e-21
321.2	1.20796e-20		321.4	2.27881e-21
321.3	1.06792e-20		321.5	2.72439e-21
321.4	1.11248e-20		321.6	2.66074e-21
321.5	1.09975e-20		321.7	2.53343e-21
321.6	1.07428e-20		321.8	3.10632e-21
321.7	1.11884e-20		321.9	1.96054e-21
321.8	1.15067e-20		322	2.46978e-21
321.9	1.05519e-20		322.1	2.59708e-21
322	1.06792e-20		322.2	2.0242e-21
322.1	1.02336e-20		322.3	2.21516e-21
322.2	9.97899e-21		322.4	2.21516e-21
322.3	9.78803e-21		322.5	2.46978e-21
322.4	9.97899e-21		322.6	1.51497e-21
322.5	9.85168e-21		322.7	2.08785e-21
322.6	9.34245e-21		322.8	1.45131e-21
322.7	8.70591e-21		322.9	1.64227e-21
322.8	8.5786e-21		323	1.76958e-21
322.9	9.02418e-21		323.1	1.13304e-21
323	8.70591e-21		323.2	1.51497e-21
323.1	8.70591e-21		323.3	1.38766e-21
323.2	8.5786e-21		323.4	1.51497e-21
323.3	7.7511e-21		323.5	1.38766e-21
323.4	8.51495e-21		323.6	8.14772e-22
323.5	7.81475e-21		323.7	1.45131e-21
323.6	7.49648e-21		323.8	2.72439e-21
323.7	7.7511e-21		323.9	2.0242e-21
323.8	8.26033e-21		324	1.324e-21
323.9	7.68745e-21		324.1	2.15151e-21
324	7.17821e-21		324.2	1.70593e-21
324.1	7.24187e-21		324.3	2.34247e-21
324.2	6.85994e-21		324.4	8.78426e-22
324.3	7.7511e-21		324.5	6.87464e-22
324.4	6.60533e-21		324.6	1.70593e-21
324.5	5.90513e-21		324.7	1.76958e-21
324.6	6.79629e-21		324.8	2.15151e-21
324.7	6.0961e-21		324.9	7.51118e-22
324.8	6.47802e-21		325	3.69194e-22
324.9	6.03244e-21		325.1	6.87464e-22
325	6.2234e-21		325.2	1.13304e-21
325.1	5.45956e-21		325.3	1.38766e-21
325.2	6.66898e-21		325.4	7.51118e-22
325.3	5.33225e-21		325.5	1.38766e-21
325.4	4.63205e-21		325.6	1.38766e-21
325.5	5.71417e-21		325.7	1.13304e-21
325.6	5.26859e-21		325.8	8.78426e-22
325.7	5.3959e-21		325.9	9.4208e-22
325.8	5.07763e-21		326	8.14772e-22
325.9	5.26859e-21		326.1	3.69194e-22
326	4.88667e-21		326.2	9.4208e-22
326.1	4.25013e-21		326.3	3.0554e-22
326.2	4.69571e-21		326.4	-1.40038e-22
326.3	4.25013e-21		326.5	1.78232e-22
326.4	4.44109e-21		326.6	4.32848e-22
326.5	4.75936e-21		326.7	8.78426e-22
326.6	4.31378e-21		326.8	6.2381e-22
326.7	3.7409e-21		326.9	1.00573e-21
326.8	4.31378e-21		327	9.4208e-22
326.9	4.44109e-21		327.1	1.06939e-21
327	4.25013e-21		327.2	-2.03692e-22
327.1	4.25013e-21		327.3	3.69194e-22
327.2	3.67724e-21		327.4	4.32848e-22
327.3	3.35897e-21		327.5	1.13304e-21
327.4	3.61359e-21		327.6	7.51118e-22
327.5	3.86821e-21		327.7	5.0924e-23
327.6	3.67724e-21		327.8	1.78232e-22
327.7	2.78609e-21		327.9	1.26035e-21
327.8	2.78609e-21		328	6.87464e-22
327.9	4.18648e-21		328.1	9.4208e-22
328	3.10436e-21		328.2	4.32848e-22
328.1	3.29532e-21		328.3	3.69194e-22
328.2	3.10436e-21		328.4	5.60156e-22
328.3	3.10436e-21		328.5	4.32848e-22
328.4	2.84974e-21		328.6	-4.58308e-22
328.5	2.72243e-21		328.7	3.0554e-22
328.6	2.40416e-21		328.8	5.0924e-23
328.7	2.40416e-21		328.9	-1.273e-23
328.8	3.0407e-21		329	-1.273e-23
328.9	2.46782e-21		329.1	1.14578e-22
329	2.84974e-21		329.2	8.14772e-22
329.1	2.27686e-21		329.3	5.0924e-23
329.2	2.59513e-21		329.4	4.96502e-22
329.3	2.78609e-21		329.5	-7.63839e-23
329.4	2.72243e-21		329.6	1.14578e-22
329.5	1.70397e-21		329.7	5.0924e-23
329.6	2.84974e-21		329.8	-1.40038e-22
329.7	2.46782e-21		329.9	1.78232e-22
329.8	1.13108e-21		330	-2.67346e-22
329.9	1.76762e-21		330.1	-2.67346e-22
330	2.34051e-21		330.2	-3.94654e-22
330.1	1.64032e-21		330.3	-1.40038e-22
330.2	1.70397e-21		330.4	5.0924e-23
330.3	1.83128e-21		330.5	3.69194e-22
330.4	2.02224e-21		330.6	3.69194e-22
330.5	2.14955e-21		330.7	-3.31e-22
330.6	1.89493e-21		330.8	-2.67346e-22
330.7	1.3857e-21		330.9	2.41886e-22
330.8	1.64032e-21		331	-3.31e-22
330.9	1.32205e-21		331.1	1.14578e-22
331	1.25839e-21		331.2	-1.273e-23
331.1	1.83128e-21		331.3	3.69194e-22
331.2	1.83128e-21		331.4	-5.85616e-22
331.3	1.76762e-21		331.5	5.0924e-23
331.4	9.40122e-22		331.6	1.14578e-22
331.5	3.6724e-22		331.7	1.78232e-22
331.6	1.3857e-21		331.8	-2.67346e-22
331.7	1.06743e-21		331.9	1.78232e-22
331.8	1.32205e-21		332	-4.58308e-22
331.9	1.51301e-21		332.1	-2.67346e-22
332	8.12814e-22		332.2	-2.67346e-22
332.1	4.3089e-22		332.3	3.0554e-22
332.2	1.06743e-21		332.4	2.41886e-22
332.3	1.44935e-21		332.5	5.0924e-23
332.4	1.13108e-21		332.6	-1.40038e-22
332.5	1.06743e-21		332.7	3.0554e-22
332.6	9.40122e-22		332.8	-3.94654e-22
332.7	1.06743e-21		332.9	1.78232e-22
332.8	6.21852e-22		333	-4.58308e-22
332.9	6.21852e-22		333.1	-4.58308e-22
333	6.21852e-22		333.2	9.4208e-22
333.1	8.76468e-22		333.3	-2.03692e-22
333.2	1.00378e-21		333.4	5.60156e-22
333.3	7.4916e-22		333.5	-1.40038e-22
333.4	1.3857e-21		333.6	-1.40038e-22
333.5	4.94544e-22		333.7	-7.63839e-23
333.6	1.44935e-21		333.8	-4.58308e-22
333.7	7.4916e-22		333.9	-4.58308e-22
333.8	5.58198e-22		334	-4.58308e-22
333.9	7.4916e-22		334.1	2.41886e-22
334	8.12814e-22		334.2	-2.03692e-22
334.1	1.25839e-21		334.3	3.0554e-22
334.2	1.13108e-21		334.4	3.0554e-22
334.3	6.21852e-22		334.5	-2.67346e-22
334.4	5.58198e-22		334.6	5.0924e-23
334.5	3.6724e-22		334.7	-4.58308e-22
334.6	3.0358e-22		334.8	-2.67346e-22
334.7	5.58198e-22		334.9	-7.76578e-22
334.8	-1.469e-23		335	-4.58308e-22
334.9	4.94544e-22		335.1	1.78232e-22
335	3.0358e-22		335.2	1.78232e-22
335.1	9.40122e-22		335.3	1.14578e-22
335.2	6.85506e-22		335.4	5.0924e-23
335.3	4.94544e-22		335.5	1.78232e-22
335.4	4.94544e-22		335.6	-9.03886e-22
335.5	-7.834e-23		335.7	-1.40038e-22
335.6	-2.693e-22		335.8	-2.03692e-22
335.7	8.76468e-22		335.9	-7.63839e-23
335.8	-7.834e-23		336	3.69194e-22
335.9	3.6724e-22		336.1	-4.58308e-22
336	4.3089e-22		336.2	-4.58308e-22
336.1	-1.469e-23		336.3	-1.273e-23
336.2	4.897e-23		336.4	-4.58308e-22
336.3	4.94544e-22		336.5	-7.63839e-23
336.4	4.94544e-22		336.6	-5.21962e-22
336.5	4.94544e-22		336.7	-3.94654e-22
336.6	4.94544e-22		336.8	-3.94654e-22
336.7	1.7627e-22		336.9	-3.94654e-22
336.8	2.3993e-22		337	-1.40038e-22
336.9	5.58198e-22		337.1	-1.273e-23
337	-1.469e-23		337.2	-2.67346e-22
337.1	4.94544e-22		337.3	-4.58308e-22
337.2	4.3089e-22		337.4	-5.85616e-22
337.3	3.0358e-22		337.5	-1.273e-23
337.4	1.1262e-22		337.6	5.0924e-23
337.5	3.0358e-22		337.7	-1.40038e-22
337.6	3.0358e-22		337.8	-5.85616e-22
337.7	-1.469e-23		337.9	-4.58308e-22
337.8	-3.3296e-22		338	-6.4927e-22
337.9	4.897e-23		338.1	-3.94654e-22
338	4.3089e-22		338.2	-3.31e-22
338.1	1.1262e-22		338.3	-2.67346e-22
338.2	4.3089e-22		338.4	-1.03119e-21
338.3	4.3089e-22		338.5	-7.76578e-22
338.4	-5.8757e-22		338.6	-3.94654e-22
338.5	4.3089e-22		338.7	6.2381e-22
338.6	-1.469e-23		338.8	-5.21962e-22
338.7	1.44935e-21		338.9	-2.67346e-22
338.8	1.7627e-22		339	-3.94654e-22
338.9	-1.469e-23		339.1	-9.6754e-22
339	-2.0565e-22		339.2	-4.58308e-22
339.1	-1.469e-23		339.3	-7.76578e-22
339.2	1.7627e-22		339.4	-4.58308e-22
339.3	-5.2392e-22		339.5	-2.67346e-22
339.4	1.1262e-22		339.6	-9.03886e-22
339.5	5.58198e-22		339.7	-5.85616e-22
339.6	-1.469e-23		339.8	-7.12924e-22
339.7	1.7627e-22		339.9	-3.31e-22
339.8	-2.693e-22		340	-5.21962e-22
339.9	2.3993e-22		340.1	-8.40232e-22
340	-7.834e-23		340.2	-3.31e-22
340.1	-1.42e-22		340.3	-9.03886e-22
340.2	-1.469e-23		340.4	-1.40038e-22
340.3	-3.3296e-22		340.5	-4.58308e-22
340.4	4.94544e-22		340.6	-7.76578e-22
340.5	2.3993e-22		340.7	-1.22216e-21
340.6	4.897e-23		340.8	-7.12924e-22
340.7	-7.834e-23		340.9	-2.03692e-22
340.8	-1.469e-23		341	-2.03692e-22
340.9	4.94544e-22		341.1	-3.31e-22
341	3.6724e-22		341.2	2.41886e-22
341.1	-7.1488e-22		341.3	-5.85616e-22
341.2	4.94544e-22		341.4	1.14578e-22
341.3	-4.6027e-22		341.5	-2.67346e-22
341.4	-7.834e-23		341.6	5.0924e-23
341.5	-1.469e-23		341.7	-2.67346e-22
341.6	5.58198e-22		341.8	-7.12924e-22
341.7	-1.42e-22		341.9	-2.03692e-22
341.8	-3.9661e-22		342	5.0924e-23
341.9	4.897e-23		342.1	-7.76578e-22
342	3.0358e-22		342.2	-6.4927e-22
342.1	-8.4219e-22		342.3	-4.58308e-22
342.2	-3.9661e-22		342.4	2.41886e-22
342.3	1.7627e-22		342.5	4.32848e-22
342.4	6.21852e-22		342.6	-9.03886e-22
342.5	4.3089e-22		342.7	-3.94654e-22
342.6	-5.2392e-22		342.8	-7.12924e-22
342.7	3.6724e-22		342.9	-9.6754e-22
342.8	-2.0565e-22		343	1.14578e-22
342.9	-2.693e-22		343.1	1.14578e-22
343	1.1262e-22		343.2	-4.58308e-22
343.1	3.6724e-22		343.3	-6.4927e-22
343.2	4.897e-23		343.4	-1.40038e-22
343.3	-3.3296e-22		343.5	1.14578e-22
343.4	-1.42e-22		343.6	-2.03692e-22
343.5	1.7627e-22		343.7	-2.67346e-22
343.6	1.7627e-22		343.8	3.0554e-22
343.7	4.897e-23		343.9	-5.21962e-22
343.8	6.21852e-22		344	-2.67346e-22
343.9	-1.42e-22		344.1	-8.40232e-22
344	-1.42e-22		344.2	-7.12924e-22
344.1	-3.3296e-22		344.3	-8.40232e-22
344.2	-3.9661e-22		344.4	-7.76578e-22
344.3	1.1262e-22		344.5	1.78232e-22
344.4	-3.9661e-22		344.6	-2.03692e-22
344.5	6.21852e-22		344.7	-1.273e-23
344.6	-1.42e-22		344.8	-8.40232e-22
344.7	4.3089e-22		344.9	-4.58308e-22
344.8	1.1262e-22		345	-4.58308e-22
344.9	2.3993e-22		345.1	-7.76578e-22
345	-5.2392e-22		345.2	-2.03692e-22
345.1	-1.42e-22		345.3	-2.67346e-22
345.2	3.0358e-22		345.4	-2.03692e-22
345.3	1.7627e-22		345.5	-7.63839e-23
345.4	-3.3296e-22		345.6	-8.40232e-22
345.5	3.0358e-22		345.7	-3.94654e-22
345.6	-3.3296e-22		345.8	-2.67346e-22
345.7	-1.42e-22		345.9	-2.03692e-22
345.8	-2.0565e-22		346	1.14578e-22
345.9	-7.834e-23		346.1	1.14578e-22
346	-7.834e-23		346.2	-9.6754e-22
346.1	3.6724e-22		346.3	-1.40038e-22
346.2	1.7627e-22		346.4	-4.58308e-22
346.3	-1.42e-22		346.5	-3.94654e-22
346.4	-4.6027e-22		346.6	-2.67346e-22
346.5	-3.3296e-22		346.7	-2.67346e-22
346.6	4.897e-23		346.8	-7.63839e-23
346.7	-1.469e-23		346.9	-5.21962e-22
346.8	1.1262e-22		347	-2.67346e-22
346.9	-7.834e-23		347.1	-1.1585e-21
347	4.94544e-22		347.2	-3.31e-22
347.1	-7.1488e-22		347.3	-8.40232e-22
347.2	-5.2392e-22		347.4	-1.273e-23
347.3	-2.0565e-22		347.5	-2.67346e-22
347.4	1.1262e-22		347.6	-7.63839e-23
347.5	3.0358e-22		347.7	-3.31e-22
347.6	-1.42e-22		347.8	-1.40038e-22
347.7	-2.693e-22		347.9	-2.67346e-22
347.8	1.7627e-22		348	-7.63839e-23
347.9	-1.42e-22		348.1	-3.31e-22
348	2.3993e-22		348.2	-7.63839e-23
348.1	-1.469e-23		348.3	-9.03886e-22
348.2	-2.0565e-22		348.4	-4.58308e-22
348.3	-8.4219e-22		348.5	-1.273e-23
348.4	1.7627e-22		348.6	-5.21962e-22
348.5	4.897e-23		348.7	-9.6754e-22
348.6	1.7627e-22		348.8	-5.85616e-22
348.7	-3.9661e-22		348.9	-1.40038e-22
348.8	-3.3296e-22		349	-3.94654e-22
348.9	1.7627e-22		349.1	-5.21962e-22
349	-3.9661e-22		349.2	-5.85616e-22
349.1	-2.693e-22		349.3	-4.58308e-22
349.2	-7.834e-23		349.4	-3.94654e-22
349.3	-2.693e-22		349.5	-5.85616e-22
349.4	-2.0565e-22		349.6	-1.40038e-22
349.5	-3.9661e-22		349.7	-1.22216e-21
349.6	-5.2392e-22		349.8	5.0924e-23
349.7	-1.469e-23		349.9	-1.1585e-21
349.8	1.7627e-22		350	-6.4927e-22
349.9	-3.3296e-22		350.1	-2.67346e-22
350	-4.6027e-22		350.2	-3.94654e-22
350.1	1.1262e-22		350.3	-4.58308e-22
350.2	-1.42e-22		350.4	-2.67346e-22
350.3	-7.834e-23		350.5	1.78232e-22
350.4	1.1262e-22		350.6	-7.76578e-22
350.5	-3.9661e-22		350.7	-1.03119e-21
350.6	-2.0565e-22		350.8	-5.85616e-22
350.7	-5.8757e-22		350.9	-1.03119e-21
350.8	-1.42e-22		351	5.0924e-23
350.9	-2.693e-22		351.1	1.78232e-22
351	3.0358e-22		351.2	-2.67346e-22
351.1	-5.2392e-22		351.3	-2.03692e-22
351.2	-2.693e-22		351.4	-4.58308e-22
351.3	-1.469e-23		351.5	-1.40038e-22
351.4	-7.834e-23		351.6	-1.40038e-22
351.5	-1.42e-22		351.7	-2.03692e-22
351.6	-4.6027e-22		351.8	-3.31e-22
351.7	-2.693e-22		351.9	-7.63839e-23
351.8	-7.1488e-22		352	-7.63839e-23
351.9	1.7627e-22		352.1	-9.03886e-22
352	4.897e-23		352.2	-4.58308e-22
352.1	-7.1488e-22		352.3	5.60156e-22
352.2	-3.9661e-22		352.4	-5.21962e-22
352.3	3.6724e-22		352.5	-3.94654e-22
352.4	-1.42e-22		352.6	-4.58308e-22
352.5	-2.693e-22		352.7	-4.58308e-22
352.6	-3.9661e-22		352.8	-1.273e-23
352.7	-4.6027e-22		352.9	-9.6754e-22
352.8	-3.3296e-22		353	-1.40038e-22
352.9	-2.693e-22		353.1	-3.94654e-22
353	-7.834e-23		353.2	-9.03886e-22
353.1	-7.834e-23		353.3	-5.21962e-22
353.2	-5.8757e-22		353.4	-3.31e-22
353.3	-1.469e-23		353.5	-2.67346e-22
353.4	2.3993e-22		353.6	-3.94654e-22
353.5	-1.42e-22		353.7	-2.67346e-22
353.6	-1.469e-23		353.8	-2.03692e-22
353.7	1.1262e-22		353.9	-7.76578e-22
353.8	1.1262e-22		354	-2.03692e-22
353.9	-3.3296e-22		354.1	2.41886e-22
354	-7.834e-23		354.2	-2.03692e-22
354.1	2.3993e-22		354.3	-1.40038e-22
354.2	-1.42e-22		354.4	1.14578e-22
354.3	5.58198e-22		354.5	-1.40038e-22
354.4	3.6724e-22		354.6	-3.31e-22
354.5	2.3993e-22		354.7	-2.03692e-22
354.6	-7.834e-23		354.8	-1.40038e-22
354.7	1.1262e-22		354.9	-2.03692e-22
354.8	1.7627e-22		355	2.41886e-22
354.9	1.1262e-22		355.1	-4.58308e-22
355	4.897e-23		355.2	-1.273e-23
355.1	2.3993e-22		355.3	1.78232e-22
355.2	1.1262e-22		355.4	-5.21962e-22
355.3	1.1262e-22		355.5	-3.94654e-22
355.4	-3.3296e-22		355.6	-6.4927e-22
355.5	-1.42e-22		355.7	-7.63839e-23
355.6	-2.693e-22		355.8	-2.67346e-22
355.7	-7.834e-23		355.9	2.41886e-22
355.8	-1.469e-23		356	-5.21962e-22
355.9	4.3089e-22		356.1	-1.03119e-21
356	-4.6027e-22		356.2	-3.94654e-22
356.1	1.1262e-22		356.3	-5.85616e-22
356.2	4.897e-23		356.4	-2.67346e-22
356.3	-2.0565e-22		356.5	-2.03692e-22
356.4	-1.42e-22		356.6	-1.40038e-22
356.5	-7.1488e-22		356.7	-1.273e-23
356.6	1.1262e-22		356.8	-2.03692e-22
356.7	-2.0565e-22		356.9	-3.94654e-22
356.8	-2.0565e-22		357	-2.03692e-22
356.9	-3.9661e-22		357.1	-6.4927e-22
357	2.3993e-22		357.2	-5.21962e-22
357.1	-1.42e-22		357.3	-1.40038e-22
357.2	2.3993e-22		357.4	-3.31e-22
357.3	1.7627e-22		357.5	-3.31e-22
357.4	4.897e-23		357.6	-4.58308e-22
357.5	-7.834e-23		357.7	1.78232e-22
357.6	-3.3296e-22		357.8	5.0924e-23
357.7	4.897e-23		357.9	2.41886e-22
357.8	-2.0565e-22		358	-2.03692e-22
357.9	4.897e-23		358.1	5.0924e-23
358	2.3993e-22		358.2	-1.40038e-22
358.1	5.58198e-22		358.3	-7.76578e-22
358.2	1.1262e-22		358.4	-2.67346e-22
358.3	-1.42e-22		358.5	-2.67346e-22
358.4	-3.3296e-22		358.6	-3.31e-22
358.5	-1.42e-22		358.7	-2.67346e-22
358.6	1.1262e-22		358.8	-4.58308e-22
358.7	-2.693e-22		358.9	-1.273e-23
358.8	-7.7854e-22		359	-7.12924e-22
358.9	2.3993e-22		359.1	-3.94654e-22
359	-2.693e-22		359.2	-1.40038e-22
359.1	3.6724e-22		359.3	-2.03692e-22
359.2	4.897e-23		359.4	-2.67346e-22
359.3	3.6724e-22		359.5	-5.85616e-22
359.4	2.3993e-22		359.6	-5.21962e-22
359.5	-2.693e-22		359.7	4.32848e-22
359.6	-5.2392e-22		359.8	-7.12924e-22
359.7	6.85506e-22		359.9	-8.40232e-22
359.8	-4.6027e-22		360	-3.94654e-22
359.9	-3.3296e-22		360.1	-6.4927e-22
360	2.3993e-22		360.2	-4.58308e-22
360.1	-4.6027e-22		360.3	1.78232e-22
360.2	1.1262e-22		360.4	-7.63839e-23
360.3	2.3993e-22		360.5	-6.4927e-22
360.4	-4.6027e-22		360.6	-2.67346e-22
360.5	-3.3296e-22		360.7	-3.94654e-22
360.6	-1.42e-22		360.8	-3.31e-22
360.7	-5.2392e-22		360.9	-7.63839e-23
360.8	-2.0565e-22		361	-1.273e-23
360.9	1.7627e-22		361.1	-3.94654e-22
361	3.0358e-22		361.2	-7.63839e-23
361.1	-5.8757e-22		361.3	-3.94654e-22
361.2	-1.469e-23		361.4	-5.85616e-22
361.3	-7.834e-23		361.5	-5.21962e-22
361.4	-4.6027e-22		361.6	-7.63839e-23
361.5	-4.6027e-22		361.7	-2.67346e-22
361.6	-1.42e-22		361.8	-5.85616e-22
361.7	3.6724e-22		361.9	-4.58308e-22
361.8	-1.42e-22		362	-3.94654e-22
361.9	-2.693e-22		362.1	-1.273e-23
362	-3.3296e-22		362.2	-7.63839e-23
362.1	-7.834e-23		362.3	1.14578e-22
362.2	-1.42e-22		362.4	-2.03692e-22
362.3	3.6724e-22		362.5	-7.63839e-23
362.4	3.6724e-22		362.6	-3.94654e-22
362.5	-1.469e-23		362.7	-6.4927e-22
362.6	-7.834e-23		362.8	-5.21962e-22
362.7	-7.834e-23		362.9	3.0554e-22
362.8	-5.2392e-22		363	-5.85616e-22
362.9	1.7627e-22		363.1	-7.12924e-22
363	-5.2392e-22		363.2	-4.58308e-22
363.1	-7.7854e-22		363.3	-1.40038e-22
363.2	1.7627e-22		363.4	5.0924e-23
363.3	4.94544e-22		363.5	-2.03692e-22
363.4	-1.42e-22		363.6	-5.85616e-22
363.5	2.3993e-22		363.7	-3.94654e-22
363.6	-3.3296e-22		363.8	-5.85616e-22
363.7	4.897e-23		363.9	-4.58308e-22
363.8	-4.6027e-22		364	-7.63839e-23
363.9	-2.0565e-22		364.1	-4.58308e-22
364	-1.42e-22		364.2	-2.67346e-22
364.1	-1.42e-22		364.3	-2.03692e-22
364.2	4.897e-23		364.4	-4.58308e-22
364.3	-6.5123e-22		364.5	-3.31e-22
364.4	1.1262e-22		364.6	-7.63839e-23
364.5	-2.0565e-22		364.7	-7.63839e-23
364.6	1.1262e-22		364.8	-3.31e-22
364.7	-2.693e-22		364.9	-2.03692e-22
364.8	-1.469e-23		365	-7.63839e-23
364.9	-2.693e-22		365.1	-2.67346e-22
365	-1.469e-23		365.2	-3.31e-22
365.1	4.897e-23		365.3	-2.03692e-22
365.2	1.1262e-22		365.4	-4.58308e-22
365.3	-1.42e-22		365.5	-5.21962e-22
365.4	-2.0565e-22		365.6	-7.76578e-22
365.5	-4.6027e-22		365.7	1.78232e-22
365.6	1.1262e-22		365.8	-5.85616e-22
365.7	-1.469e-23		365.9	-6.4927e-22
365.8	-1.469e-23		366	1.78232e-22
365.9	-2.0565e-22		366.1	3.0554e-22
366	4.3089e-22		366.2	-6.4927e-22
366.1	-7.834e-23		366.3	-7.63839e-23
366.2	-1.469e-23		366.4	-5.85616e-22
366.3	1.7627e-22		366.5	-5.21962e-22
366.4	2.3993e-22		366.6	-7.12924e-22
366.5	1.1262e-22		366.7	-5.21962e-22
366.6	-2.693e-22		366.8	5.0924e-23
366.7	-7.834e-23		366.9	-2.03692e-22
366.8	-1.469e-23		367	-1.40038e-22
366.9	-2.693e-22		367.1	-1.273e-23
367	3.0358e-22		367.2	-7.63839e-23
367.1	-2.0565e-22		367.3	-3.31e-22
367.2	-1.469e-23		367.4	-2.67346e-22
367.3	-3.3296e-22		367.5	-5.85616e-22
367.4	4.3089e-22		367.6	-2.67346e-22
367.5	-1.42e-22		367.7	-3.31e-22
367.6	4.897e-23		367.8	-2.67346e-22
367.7	1.1262e-22		367.9	-1.273e-23
367.8	-2.693e-22		368	5.0924e-23
367.9	-1.42e-22		368.1	-9.03886e-22
368	1.7627e-22		368.2	-2.03692e-22
368.1	-4.6027e-22		368.3	-2.03692e-22
368.2	-3.9661e-22		368.4	-4.58308e-22
368.3	-1.469e-23		368.5	2.41886e-22
368.4	-1.42e-22		368.6	-1.40038e-22
368.5	2.3993e-22		368.7	5.0924e-23
368.6	1.7627e-22		368.8	-3.31e-22
368.7	2.3993e-22		368.9	3.0554e-22
368.8	-3.9661e-22		369	-2.67346e-22
368.9	4.897e-23		369.1	2.41886e-22
369	-7.834e-23		369.2	-7.63839e-23
369.1	-1.469e-23		369.3	-2.03692e-22
369.2	1.7627e-22		369.4	-7.12924e-22
369.3	-5.8757e-22		369.5	-4.58308e-22
369.4	-4.6027e-22		369.6	-2.03692e-22
369.5	-3.3296e-22		369.7	1.14578e-22
369.6	-1.469e-23		369.8	-7.12924e-22
369.7	2.3993e-22		369.9	-7.63839e-23
369.8	-4.6027e-22		370	3.0554e-22
369.9	4.897e-23		370.1	-3.31e-22
370	2.3993e-22		370.2	-2.67346e-22
370.1	2.3993e-22		370.3	-3.94654e-22
370.2	4.897e-23		370.4	1.14578e-22
370.3	3.6724e-22		370.5	5.0924e-23
370.4	4.94544e-22		370.6	-3.31e-22
370.5	2.3993e-22		370.7	-7.63839e-23
370.6	4.897e-23		370.8	-3.94654e-22
370.7	1.1262e-22		370.9	5.0924e-23
370.8	4.897e-23		371	5.0924e-23
370.9	-1.469e-23		371.1	-2.03692e-22
371	4.897e-23		371.2	-7.76578e-22
371.1	3.0358e-22		371.3	1.14578e-22
371.2	-6.5123e-22		371.4	-2.67346e-22
371.3	1.7627e-22		371.5	-1.40038e-22
371.4	-2.693e-22		371.6	-3.31e-22
371.5	1.1262e-22		371.7	-2.03692e-22
371.6	1.7627e-22		371.8	-4.58308e-22
371.7	-2.0565e-22		371.9	-9.6754e-22
371.8	-3.9661e-22		372	-4.58308e-22
371.9	-6.5123e-22		372.1	-4.58308e-22
372	-2.0565e-22		372.2	1.78232e-22
372.1	1.1262e-22		372.3	-4.58308e-22
372.2	1.1262e-22		372.4	-1.40038e-22
372.3	-2.693e-22		372.5	2.41886e-22
372.4	4.3089e-22		372.6	-1.273e-23
372.5	1.1262e-22		372.7	-1.40038e-22
372.6	1.1262e-22		372.8	-3.31e-22
372.7	1.1262e-22		372.9	-2.03692e-22
372.8	-4.6027e-22		373	5.0924e-23
372.9	-1.469e-23		373.1	5.0924e-23
373	1.1262e-22		373.2	-3.31e-22
373.1	-1.469e-23		373.3	-2.67346e-22
373.2	-1.42e-22		373.4	1.14578e-22
373.3	-3.9661e-22		373.5	1.14578e-22
373.4	-7.834e-23		373.6	-5.85616e-22
373.5	2.3993e-22		373.7	-2.67346e-22
373.6	-3.3296e-22		373.8	5.0924e-23
373.7	-1.469e-23		373.9	-7.63839e-23
373.8	2.3993e-22		374	-7.12924e-22
373.9	1.1262e-22		374.1	-3.31e-22
374	-4.6027e-22		374.2	-5.85616e-22
374.1	1.1262e-22		374.3	-3.31e-22
374.2	-1.42e-22		374.4	-1.40038e-22
374.3	-7.834e-23		374.5	5.0924e-23
374.4	1.7627e-22		374.6	-2.03692e-22
374.5	-7.834e-23		374.7	-3.31e-22
374.6	-7.834e-23		374.8	-1.40038e-22
374.7	-1.469e-23		374.9	-7.63839e-23
374.8	1.7627e-22		375	1.14578e-22
374.9	4.94544e-22		375.1	-5.21962e-22
375	3.0358e-22		375.2	-4.58308e-22
375.1	-7.834e-23		375.3	-2.03692e-22
375.2	-1.469e-23		375.4	-4.58308e-22
375.3	4.897e-23		375.5	1.78232e-22
375.4	-3.9661e-22		375.6	1.78232e-22
375.5	4.94544e-22		375.7	-1.40038e-22
375.6	2.3993e-22		375.8	-2.03692e-22
375.7	-1.42e-22		375.9	-1.40038e-22
375.8	1.7627e-22		376	-7.63839e-23
375.9	1.1262e-22		376.1	-4.58308e-22
376	-1.469e-23		376.2	-3.31e-22
376.1	-2.693e-22		376.3	-2.03692e-22
376.2	-2.693e-22		376.4	-2.03692e-22
376.3	2.3993e-22		376.5	4.96502e-22
376.4	4.897e-23		376.6	-3.31e-22
376.5	6.85506e-22		376.7	-1.40038e-22
376.6	-7.834e-23		376.8	-2.67346e-22
376.7	-2.0565e-22		376.9	-1.40038e-22
376.8	-7.834e-23		377	-1.40038e-22
376.9	4.897e-23		377.1	1.78232e-22
377	1.7627e-22		377.2	-7.63839e-23
377.1	1.7627e-22		377.3	5.0924e-23
377.2	-1.469e-23		377.4	-7.63839e-23
377.3	1.7627e-22		377.5	-3.31e-22
377.4	3.6724e-22		377.6	-7.63839e-23
377.5	-1.42e-22		377.7	-2.67346e-22
377.6	-3.9661e-22		377.8	-3.94654e-22
377.7	-1.469e-23		377.9	1.78232e-22
377.8	-3.3296e-22		378	-2.67346e-22
377.9	3.0358e-22		378.1	-1.273e-23
378	4.94544e-22		378.2	-3.31e-22
378.1	1.7627e-22		378.3	-3.94654e-22
378.2	1.7627e-22		378.4	-3.31e-22
378.3	-1.469e-23		378.5	-2.03692e-22
378.4	2.3993e-22		378.6	-1.40038e-22
378.5	-5.2392e-22		378.7	-3.94654e-22
378.6	3.6724e-22		378.8	-5.21962e-22
378.7	-5.8757e-22		378.9	-3.31e-22
378.8	-2.0565e-22		379	5.0924e-23
378.9	-2.0565e-22		379.1	-1.273e-23
379	-1.469e-23		379.2	-3.31e-22
379.1	-1.42e-22		379.3	-5.21962e-22
379.2	2.3993e-22		379.4	-2.67346e-22
379.3	-3.9661e-22		379.5	-1.40038e-22
379.4	-7.834e-23		379.6	-3.94654e-22
379.5	-3.3296e-22		379.7	1.14578e-22
379.6	-1.469e-23		379.8	5.0924e-23
379.7	-7.834e-23		379.9	-1.273e-23
379.8	-7.834e-23		380	-2.03692e-22
379.9	-1.42e-22		380.1	-1.40038e-22
380	1.1262e-22		380.2	1.14578e-22
380.1	-2.0565e-22		380.3	4.32848e-22
380.2	2.3993e-22		380.4	-1.40038e-22
380.3	1.7627e-22		380.5	-7.63839e-23
380.4	2.3993e-22		380.6	-3.31e-22
380.5	4.897e-23		380.7	-3.94654e-22
380.6	-2.693e-22		380.8	-7.63839e-23
380.7	-2.0565e-22		380.9	5.0924e-23
380.8	-1.42e-22		381	-1.40038e-22
380.9	-1.469e-23		381.1	-2.67346e-22
381	1.1262e-22		381.2	3.69194e-22
381.1	-7.834e-23		381.3	-4.58308e-22
381.2	4.3089e-22		381.4	-1.40038e-22
381.3	-1.42e-22		381.5	-4.58308e-22
381.4	-7.834e-23		381.6	-7.63839e-23
381.5	-7.834e-23		381.7	-4.58308e-22
381.6	4.3089e-22		381.8	-2.67346e-22
381.7	-1.42e-22		381.9	5.0924e-23
381.8	-1.469e-23		382	4.96502e-22
381.9	3.0358e-22		382.1	-1.273e-23
382	3.6724e-22		382.2	1.14578e-22
382.1	-1.469e-23		382.3	1.14578e-22
382.2	3.0358e-22		382.4	-2.03692e-22
382.3	4.897e-23		382.5	-5.21962e-22
382.4	4.94544e-22		382.6	-1.40038e-22
382.5	-2.693e-22		382.7	-7.63839e-23
382.6	-7.834e-23		382.8	3.0554e-22
382.7	-1.469e-23		382.9	-1.273e-23
382.8	1.7627e-22		383	-7.63839e-23
382.9	2.3993e-22		383.1	-5.21962e-22
383	3.0358e-22		383.2	-3.94654e-22
383.1	-3.3296e-22		383.3	-2.67346e-22
383.2	-1.42e-22		383.4	-3.31e-22
383.3	-1.469e-23		383.5	2.41886e-22
383.4	-7.834e-23		383.6	1.14578e-22
383.5	2.3993e-22		383.7	-7.63839e-23
383.6	4.897e-23		383.8	-7.63839e-23
383.7	-1.469e-23		383.9	-4.58308e-22
383.8	4.897e-23		384	-2.67346e-22
383.9	-2.0565e-22		384.1	-7.63839e-23
384	-7.834e-23		384.2	5.0924e-23
384.1	1.1262e-22		384.3	1.14578e-22
384.2	4.897e-23		384.4	-1.40038e-22
384.3	4.3089e-22		384.5	2.41886e-22
384.4	-1.469e-23		384.6	-1.273e-23
384.5	1.7627e-22		384.7	1.78232e-22
384.6	-1.469e-23		384.8	-1.273e-23
384.7	4.897e-23		384.9	-7.63839e-23
384.8	2.3993e-22		385	-7.63839e-23
384.9	-1.469e-23		385.1	-7.12924e-22
385	1.1262e-22		385.2	2.41886e-22
385.1	-3.3296e-22		385.3	5.0924e-23
385.2	1.1262e-22		385.4	1.78232e-22
385.3	1.1262e-22		385.5	-7.63839e-23
385.4	3.0358e-22		385.6	5.0924e-23
385.5	4.94544e-22		385.7	1.78232e-22
385.6	1.1262e-22		385.8	-7.63839e-23
385.7	1.1262e-22		385.9	1.78232e-22
385.8	1.1262e-22		386	-7.63839e-23
385.9	4.897e-23		386.1	-1.273e-23
386	2.3993e-22		386.2	1.78232e-22
386.1	3.6724e-22		386.3	-2.03692e-22
386.2	1.7627e-22		386.4	-1.40038e-22
386.3	-1.42e-22		386.5	-2.67346e-22
386.4	-2.693e-22		386.6	5.0924e-23
386.5	1.7627e-22		386.7	1.14578e-22
386.6	5.58198e-22		386.8	-7.63839e-23
386.7	4.897e-23		386.9	-7.63839e-23
386.8	-2.693e-22		387	5.0924e-23
386.9	1.7627e-22		387.1	-2.67346e-22
387	1.7627e-22		387.2	-3.31e-22
387.1	-1.42e-22		387.3	-1.273e-23
387.2	-7.834e-23		387.4	-2.03692e-22
387.3	4.897e-23		387.5	-2.03692e-22
387.4	4.897e-23		387.6	-7.63839e-23
387.5	-3.9661e-22		387.7	-3.31e-22
387.6	3.6724e-22		387.8	-1.40038e-22
387.7	3.0358e-22		387.9	-2.03692e-22
387.8	4.94544e-22		388	-1.40038e-22
387.9	2.3993e-22		388.1	-7.63839e-23
388	-1.42e-22		388.2	1.78232e-22
388.1	2.3993e-22		388.3	1.14578e-22
388.2	2.3993e-22		388.4	1.78232e-22
388.3	1.7627e-22		388.5	5.0924e-23
388.4	-1.469e-23		388.6	-1.273e-23
388.5	3.6724e-22		388.7	-1.273e-23
388.6	-1.469e-23		388.8	5.0924e-23
388.7	2.3993e-22		388.9	-1.273e-23
388.8	4.897e-23		389	-3.31e-22
388.9	-1.469e-23		389.1	-2.67346e-22
389	-1.469e-23		389.2	1.14578e-22
389.1	-1.469e-23		389.3	-3.94654e-22
389.2	-1.469e-23		389.4	5.0924e-23
389.3	1.1262e-22		389.5	-1.273e-23
389.4	-7.834e-23		389.6	1.78232e-22
389.5	2.3993e-22		389.7	2.41886e-22
389.6	4.3089e-22		389.8	1.14578e-22
389.7	1.7627e-22		389.9	1.14578e-22
389.8	3.6724e-22		390	5.0924e-23
389.9	2.3993e-22		390.1	-2.03692e-22
390	3.0358e-22		390.2	-2.03692e-22
390.1	-1.42e-22		390.3	5.0924e-23
390.2	4.897e-23		390.4	-3.94654e-22
390.3	4.897e-23		390.5	-1.273e-23
390.4	-7.834e-23		390.6	1.14578e-22
390.5	1.1262e-22		390.7	-2.03692e-22
390.6	1.1262e-22		390.8	-1.40038e-22
390.7	-1.42e-22		390.9	-1.273e-23
390.8	-7.834e-23		391	-1.273e-23
390.9	4.897e-23		391.1	-1.40038e-22
391	-7.834e-23		391.2	1.78232e-22
391.1	1.7627e-22		391.3	-3.31e-22
391.2	1.1262e-22		391.4	5.0924e-23
391.3	-1.469e-23		391.5	1.14578e-22
391.4	-1.469e-23		391.6	-4.58308e-22
391.5	-1.42e-22		391.7	-7.63839e-23
391.6	1.1262e-22		391.8	-2.03692e-22
391.7	-1.42e-22		391.9	5.0924e-23
391.8	3.0358e-22		392	1.14578e-22
391.9	-1.469e-23		392.1	-1.40038e-22
392	1.1262e-22		392.2	-1.40038e-22
392.1	-2.0565e-22		392.3	2.41886e-22
392.2	4.897e-23		392.4	-1.273e-23
392.3	4.94544e-22		392.5	-1.273e-23
392.4	1.1262e-22		392.6	-5.85616e-22
392.5	-1.469e-23		392.7	-3.31e-22
392.6	-3.9661e-22		392.8	-1.273e-23
392.7	-1.469e-23		392.9	-1.40038e-22
392.8	-1.469e-23		393	1.78232e-22
392.9	-1.469e-23		393.1	-2.03692e-22
393	1.7627e-22		393.2	-1.273e-23
393.1	1.1262e-22		393.3	3.0554e-22
393.2	1.1262e-22		393.4	1.14578e-22
393.3	2.3993e-22		393.5	-1.40038e-22
393.4	4.94544e-22		393.6	-1.40038e-22
393.5	1.1262e-22		393.7	-1.40038e-22
393.6	-1.469e-23		393.8	4.96502e-22
393.7	-1.469e-23		393.9	-1.273e-23
393.8	3.0358e-22		394	1.78232e-22
393.9	1.7627e-22		394.1	5.0924e-23
394	1.1262e-22		394.2	-1.40038e-22
394.1	4.3089e-22		394.3	-7.63839e-23
394.2	3.0358e-22		394.4	-1.40038e-22
394.3	1.1262e-22		394.5	-2.03692e-22
394.4	1.1262e-22		394.6	1.78232e-22
394.5	-1.469e-23		394.7	-1.273e-23
394.6	1.1262e-22		394.8	-1.40038e-22
394.7	1.7627e-22		394.9	-7.63839e-23
394.8	-7.834e-23		395	-1.273e-23
394.9	1.1262e-22		395.1	-1.273e-23
395	1.1262e-22		395.2	-1.40038e-22
395.1	4.897e-23		395.3	-2.03692e-22
395.2	-1.42e-22		395.4	-2.67346e-22
395.3	1.1262e-22		395.5	-7.63839e-23
395.4	1.7627e-22		395.6	-1.40038e-22
395.5	-7.834e-23		395.7	-7.63839e-23
395.6	4.897e-23		395.8	-3.94654e-22
395.7	1.1262e-22		395.9	1.78232e-22
395.8	-7.834e-23		396	-7.63839e-23
395.9	6.21852e-22		396.1	5.0924e-23
396	1.1262e-22		396.2	-7.63839e-23
396.1	1.1262e-22		396.3	3.0554e-22
396.2	4.3089e-22		396.4	-1.40038e-22
396.3	3.0358e-22		396.5	-7.63839e-23
396.4	-1.469e-23		396.6	-2.03692e-22
396.5	-1.469e-23		396.7	1.78232e-22
396.6	1.1262e-22		396.8	-7.63839e-23
396.7	4.3089e-22		396.9	1.14578e-22
396.8	4.897e-23		397	1.78232e-22
396.9	1.1262e-22		397.1	-7.63839e-23
397	-7.834e-23		397.2	-7.63839e-23
397.1	3.6724e-22		397.3	-2.67346e-22
397.2	1.7627e-22		397.4	-1.273e-23
397.3	-3.3296e-22		397.5	-1.40038e-22
397.4	1.7627e-22		397.6	1.14578e-22
397.5	2.3993e-22		397.7	3.69194e-22
397.6	2.3993e-22		397.8	-1.40038e-22
397.7	2.3993e-22		397.9	-2.67346e-22
397.8	1.7627e-22		398	-1.273e-23
397.9	-2.693e-22		398.1	1.14578e-22
398	2.3993e-22		398.2	2.41886e-22
398.1	3.0358e-22		398.3	-7.63839e-23
398.2	6.21852e-22		398.4	-7.63839e-23
398.3	2.3993e-22		398.5	-2.03692e-22
398.4	-7.834e-23		398.6	-1.273e-23
398.5	-1.469e-23		398.7	-7.63839e-23
398.6	-1.469e-23		398.8	5.0924e-23
398.7	-2.0565e-22		398.9	2.41886e-22
398.8	1.1262e-22		399	-1.273e-23
398.9	1.7627e-22		399.1	4.32848e-22
399	3.0358e-22		399.2	1.14578e-22
399.1	3.6724e-22		399.3	-1.40038e-22
399.2	-7.834e-23		399.4	-1.40038e-22
399.3	4.897e-23		399.5	-1.273e-23
399.4	2.3993e-22		399.6	-3.31e-22
399.5	-7.834e-23		399.7	5.0924e-23
399.6	4.897e-23		399.8	3.69194e-22
399.7	3.0358e-22		399.9	-1.273e-23
399.8	1.7627e-22		400	-1.273e-23
399.9	3.6724e-22
400	1.7627e-22

## Sheet: Figure 6
Figure 6- Photolysis rate
Pinacolone (scaled J)			MEK
Wavelength (nm)	J (s-1 nm-1)		Wavelength (nm)	J (s-1 nm-1)
240	--		200	--
241	--		201	--
242	--		202	--
243	--		203	--
244	--		204	--
245	--		205	--
246	--		206	--
247	--		207	--
248	--		208	--
249	--		209	--
250	--		210	--
251	--		211	--
252	--		212	--
253	--		213	--
254	--		214	--
255	--		215	--
256	--		216	--
257	--		217	--
258	--		218	--
259	--		219	--
260	--		220	--
261	--		221	--
262	--		222	--
263	--		223	--
264	--		224	--
265	--		225	--
266	--		226	--
267	--		227	--
268	--		228	--
269	--		229	--
270	--		230	--
271	--		231	--
272	--		232	--
273	--		233	--
274	--		234	--
275	--		235	--
276	--		236	--
277	--		237	--
278	--		238	--
279	--		239	--
280	5.38537e-36		240	--
281	3.79006e-33		241	--
282	7.40134e-31		242	--
283	2.0618e-29		243	--
284	5.64435e-27		244	--
285	2.34681e-25		245	--
286	1.89291e-23		246	--
287	9.49204e-22		247	--
288	5.27535e-20		248	--
289	1.64748e-18		249	--
290	2.88246e-17		250	--
291	4.9393e-16		251	--
292	4.70256e-15		252	--
293	5.03477e-14		253	--
294	2.70109e-13		254	--
295	2.02206e-12		255	--
296	8.58542e-12		256	--
297	3.61538e-11		257	--
298	8.26982e-11		258	--
299	3.41714e-10		259	--
300	5.0092e-10		260	--
301	1.64345e-09		261	--
302	2.81872e-09		262	--
303	7.12555e-09		263	--
304	9.55336e-09		264	--
305	1.75715e-08		265	--
306	2.04354e-08		266	--
307	3.69526e-08		267	--
308	4.32496e-08		268	--
309	4.27128e-08		269	--
310	6.2351e-08		270	--
311	7.93939e-08		271	--
312	8.3414e-08		272	--
313	9.1652e-08		273	--
314	9.81414e-08		274	--
315	9.57869e-08		275	--
316	9.60247e-08		276	--
317	1.21664e-07		277	--
318	9.92234e-08		278	--
319	1.01191e-07		279	--
320	1.16068e-07		280	4.39608e-36
321	8.87231e-08		281	3.03674e-33
322	7.0023e-08		282	5.79232e-31
323	6.33667e-08		283	1.59411e-29
324	5.88853e-08		284	4.28918e-27
325	5.46203e-08		285	1.73775e-25
326	5.15012e-08		286	1.3822e-23
327	3.85454e-08		287	6.82746e-22
328	2.14606e-08		288	3.72156e-20
329	2.50351e-08		289	1.14758e-18
330	1.46002e-08		290	1.97498e-17
331	-1.92366e-09		291	3.30642e-16
332	-8.87332e-09		292	3.1001e-15
333	-1.09951e-08		293	3.22522e-14
334	-9.32613e-09		294	1.66549e-13
335	--		295	1.21989e-12
336	--		296	5.16042e-12
337	--		297	2.14268e-11
338	--		298	4.86935e-11
339	--		299	1.98662e-10
340	--		300	2.90563e-10
341	--		301	9.30966e-10
342	--		302	1.55204e-09
343	--		303	3.75895e-09
344	--		304	4.8939e-09
345	--		305	8.67494e-09
346	--		306	9.91392e-09
347	--		307	1.80222e-08
348	--		308	2.09921e-08
349	--		309	2.08612e-08
350	--		310	3.00955e-08
	--		311	3.8556e-08
	--		312	4.00752e-08
	--		313	4.26163e-08
	--		314	4.39382e-08
	--		315	4.16799e-08
	--		316	4.12396e-08
	--		317	5.19912e-08
	--		318	3.99232e-08
	--		319	4.36374e-08
	--		320	4.73088e-08
	--		321	3.78957e-08
	--		322	3.06937e-08
	--		323	2.98874e-08
	--		324	2.96412e-08
	--		325	2.75727e-08
	--		326	3.00405e-08
	--		327	2.2947e-08
	--		328	1.7613e-08
	--		329	1.998e-08
	--		330	1.44542e-08
	--		331	1.15475e-08
	--		332	9.63566e-09
	--		333	7.24266e-09
	--		334	6.6145e-09
	--		335	5.51838e-09
	--			--
	--			--
	--			--
	--			--
	--			--
	--			--
	--			--
	--			--
	--			--
	--			--
	--			--
	--			--
	--			--
	--			--
	--			--
	--			--
	--			--
	--			--
	--			--
	--			--
	--			--
	--			--
	--			--
	--			--
	--			--
	--			--
	--			--
	--			--
	--			--
	--			--
	--			--
	--			--
	--			--
	--			--
	--			--
	--			--
	--			--
	--			--
	--			--
	--			--
	--			--
	--			--
	--			--
	--			--
	--			--
	--			--
	--			--
	--			--
	--			--
	--			--
	--			--
	--			--
	--			--
	--			--
	--			--
	--			--
	--			--
	--			--
	--			--
	--			--
	--			--
	--			--
	--			--
	--			--
	--			--
	--			--
	--			--
	--			--
	--			--
	--			--
	--			--
	--			--
	--			--
	--			--
	--			--
	--			--
	--			--
	--			--
	--			--
	--			--
	--			--
	--			--
	--			--
	--			--
	--			--
	--			--
	--			--
	--			--
	--			--
	--			--
	--			--
	--			--
	--			--
	--			--
	--			--
	--			--
	--			--
	--			--
	--			--
	--			--
	--			--
	--			--
	--			--
	--			--
	--			--
	--			--
	--			--
	--			--
	--			--
	--			--
	--			--
	--			--
	--			--
	--			--
	--			--
	--			--
	--			--
	--			--
	--			--
	--			--
	--			--
	--			--
	--			--
	--			--
	--			--
	--			--
	--			--
	--			--
	--			--
	--			--
	--			--
	--			--
	--			--
	--			--
	--			--
	--			--
	--			--
	--			--
	--			--
	--			--
	--			--
	--			--
	--			--
	--			--
	--			--
	--			--
	--			--
	--			--
	--			--
	--			--
	--			--
	--			--
	--			--
	--			--
	--			--
	--			--
	--			--
	--			--
	--			--
	--			--
	--			--
	--			--
	--			--
	--			--
	--			--
	--			--
	--			--
	--			--
	--			--
	--			--
	--			--
	--			--
	--			--
	--			--
	--			--
	--			--
	--			--
	--			--
	--			--
	--			--
	--			--
	--			--
	--			--
	--			--
	--			--
	--			--
	--			--
	--			--
	--			--
	--			--
	--			--
	--			--
	--			--
	--			--
	--			--
	--			--
	--			--
	--			--
	--			--
	--			--
	--			--
	--			--
	--			--
	--			--
	--			--
	--			--
	--			--
	--			--
	--			--
	--			--
	--			--
	--			--
	--			--
	--			--
	--			--
	--			--
	--			--
	--			--
	--			--
	--			--
	--			--
	--			--
	--			--
	--			--
	--			--
	--			--
	--			--
	--			--
	--			--
	--			--
	--			--
	--			--
	--			--
	--			--
	--			--
	--			--
	--			--
	--			--
	--			--
	--			--
	--			--
	--			--
	--			--
	--			--
	--			--
	--			--
	--			--
	--			--
	--			--
	--			--
	--			--
	--			--
	--			--
	--			--
	--			--
	--			--
	--			--
	--			--
	--			--
	--			--
	--			--
	--			--
	--			--
	--			--
	--			--
	--			--
	--			--
	--			--
	--			--
	--			--
	--			--
	--			--
	--			--
	--			--
	--			--
	--			--
	--			--
	--			--
	--			--
	--			--
	--			--
	--			--
	--			--
	--			--
	--			--
	--			--
	--			--
	--			--
	--			--
	--			--
	--			--
	--			--
	--			--
	--			--
	--			--
	--			--
	--			--
	--			--
	--			--
	--			--
	--			--
	--			--
	--			--
	--			--
	--			--
	--			--
	--			--
	--			--
	--			--
	--			--
	--			--
	--			--
	--			--
	--			--
	--			--
	--			--
	--			--
	--			--
	--			--
	--			--
	--			--
	--			--
	--			--
	--			--
	--			--
	--			--
	--			--
	--			--
	--			--
	--			--
	--			--
	--			--
	--			--
	--			--
	--			--
	--			--
	--			--
	--			--
	--			--
	--			--
	--			--
	--			--
	--			--
	--			--
	--			--
	--			--
	--			--
	--			--
	--			--
	--			--
	--			--
	--			--
	--			--
	--			--
	--			--
	--			--
	--			--
	--			--
	--			--
	--			--
	--			--
	--			--
	--			--
	--			--
	--			--
	--			--
	--			--
	--			--
	--			--
	--			--
	--			--
	--			--
	--			--
	--			--
	--			--
	--			--
	--			--
	--			--
	--			--
	--			--
	--			--
	--			--
	--			--
	--			--
	--			--
	--			--
	--			--
	--			--
	--			--
	--			--
	--			--
	--			--
	--			--
	--			--
	--			--
	--			--
	--			--
	--			--
	--			--
	--			--
	--			--
	--			--
	--			--
	--			--
	--			--
	--			--
	--			--
	--			--
	--			--
	--			--
	--			--
	--			--
	--			--
	--			--
	--
	--
	--
	--
	--
	--
	--
	--
	--
	--
	--
	--
	--
	--
	--
	--
	--
	--
	--
	--
	--
	--
	--
	--
	--
	--
	--
	--
	--
	--
	--
	--
	--
	--
	--
	--
	--
	--
	--
	--
	--
	--
	--
	--
	--
	--
	--
	--
	--
	--
	--
	--
	--
	--
	--
	--
	--
	--
	--
	--
	--
	--
	--
	--
	--
	--
	--
	--
	--
	--
	--
	--
	--
	--
	--
	--
	--
	--
	--
	--
	--
	--
	--
	--
	--
	--
	--
	--
	--
	--
	--
	--
	--
	--
	--
	--
	--
	--
	--
	--
	--
	--
	--
	--
	--
	--
	--
	--
	--
	--
	--
	--
	--
	--
	--
	--
	--
	--
	--
	--
	--
	--
	--
	--
	--
	--
	--
	--
	--
	--
	--
	--
	--
	--
	--
	--
	--
	--
	--
	--
	--
	--
	--
	--
	--
	--
	--
	--
	--
	--
	--
	--
	--
	--
	--
	--
	--
	--
	--
	--
	--
	--
	--
	--
	--
	--
	--
	--
	--
	--
	--
	--
	--
	--
	--
	--
	--
	--
	--
	--
	--
	--
	--
	--
	--
	--
	--
	--
	--
	--
	--
	--
	--
	--
	--
	--
	--
	--
	--
	--
	--
	--
	--
	--
	--
	--
	--
	--
	--
	--
	--
	--
	--
	--
	--
	--
	--
	--
	--
	--
	--
	--
	--
	--
	--
	--
	--
	--
	--
	--
	--
	--
	--
	--
	--
	--
	--
	--
	--
	--
	--
	--
	--
	--
	--
	--
	--
	--
	--
	--
	--
	--
	--
	--
	--
	--
	--
	--
	--
	--
	--
	--
	--
	--
	--
	--
	--
	--
	--
	--
	--
	--
	--
	--
	--
	--
	--
	--
	--
	--
	--
	--
	--
	--
	--
	--
	--
	--
	--
	--
	--
	--
	--
	--
	--
	--
	--
	--
	--
	--
	--
	--
	--
	--
	--
	--
	--
	--
	--
	--
	--
	--
	--
	--
	--
	--
	--
	--
	--
	--
	--
	--
	--
	--
	--
	--
	--
	--
	--
	--
	--
	--
	--
	--
	--
	--
	--
	--
	--
	--
	--
	--
	--
	--
	--
	--
	--
	--
	--
	--
	--
	--
	--
	--
	--
	--
	--
	--
	--
	--
	--
	--
	--
	--
	--
	--
	--
	--
	--
	--
	--
	--
	--
	--
	--
	--
	--
	--
	--
	--
	--
	--
	--
	--
	--
	--
	--
	--
	--
	--
	--
	--
	--
	--
	--
	--
	--
	--
	--
	--
	--
	--
	--
	--
	--
	--
	--
	--
	--
	--
	--
	--
	--
	--
	--
	--
	--
	--
	--
	--
	--
	--
	--
	--
	--
	--
	--
	--
	--
	--
	--
	--
	--
	--
	--
	--
	--
	--
	--
	--
	--
	--
	--
	--
	--
	--
	--
	--
	--
	--
	--
	--
	--
	--
	--
	--
	--
	--
	--
	--
	--
	--
	--
	--
	--
	--
	--
	--
	--
	--
	--
	--
	--
	--
	--
	--
	--
	--
	--
	--
	--
	--
	--
	--
	--
	--
	--
	--
	--
	--
	--
	--
	--
	--
	--
	--
	--
	--
	--
	--
	--
	--
	--
	--
	--
	--
	--
	--
	--
	--
	--
	--
	--
	--
	--
	--
	--
	--
	--
	--
	--
	--
	--
	--
	--
	--
	--
	--
	--
	--
	--
	--
	--
	--
	--
	--
	--
	--
	--
	--
	--
	--
	--
	--
	--
	--
	--
	--
	--
	--
	--
	--
	--
	--
	--
	--
	--
	--
	--
	--
	--
	--
	--
	--
	--
	--
	--
	--
	--
	--
	--
	--
	--
	--
	--
	--
	--
	--
	--
	--
	--
	--
	--
	--
	--
	--
	--
	--
	--
	--
	--
	--
	--
	--
	--
	--
	--
	--
	--
	--
	--
	--
	--
	--
	--
	--
	--
	--
	--
	--
	--
	--
	--
	--
	--
	--
	--
	--
	--
	--
	--
	--
	--
	--
	--
	--
	--
	--
	--
	--
	--
	--
	--
	--
	--
	--
	--
	--
	--
	--
	--
	--
	--
	--
	--
	--
	--
	--
	--
	--
	--
	--
	--
	--
	--
	--
	--
	--
	--
	--
	--
	--
	--
	--
	--
	--
	--
	--
	--
	--
	--
	--
	--
	--
	--
	--
	--
	--
	--
	--
	--
	--
	--
	--
	--
	--
	--
	--
	--
	--
	--
	--
	--
	--
	--
	--
	--
	--
	--
	--
	--
	--
	--
	--
	--
	--
	--
	--
	--
	--
	--
	--
	--
	--
	--
	--
	--
	--
	--
	--
	--
	--
	--
	--
	--
	--
	--
	--
	--
	--
	--
	--
	--
	--
	--
	--
	--
	--
	--
	--
	--
	--
	--
	--
	--
	--
	--
	--
	--
	--
	--
	--
	--
	--
	--
	--
	--
	--
	--
	--
	--
	--
	--
	--
	--
	--
	--
	--
	--
	--
	--
	--
	--
	--
	--
	--
	--
	--
	--
	--
	--
	--
	--
	--
	--
	--
	--
	--
	--
	--
	--
	--
	--
	--
	--
	--
	--
	--
	--
	--
	--
	--
	--
	--
	--
	--
	--
	--
	--
	--
	--
	--
	--
	--
	--
	--
	--
	--
	--
	--
	--
	--
	--
	--
	--
	--
	--
	--
	--
	--
	--
	--
	--
	--
	--
	--
	--
	--
	--
	--
	--
	--
	--
	--
	--
	--
	--
	--
	--
	--
	--
	--
	--
	--
	--
	--
	--
	--
	--
	--
	--
	--
	--
	--
	--
	--
	--
	--
	--
	--
	--
	--
	--
	--
	--
	--
	--
	--
	--
	--
	--
	--
	--
	--
	--
	--
	--
	--
	--
	--
	--
	--
	--
	--
	--
	--
	--
	--
	--
	--
	--
	--
	--
	--
	--
	--
	--
	--
	--
	--
	--
	--
	--
	--
	--
	--
	--
	--
	--
	--
	--
	--
	--
	--
	--
	--
	--
	--
	--
	--
	--
	--
	--
	--
	--
	--
	--
	--
	--
	--
	--
	--
	--
	--
	--
	--
	--
	--
	--
	--
	--
	--
	--
	--
	--
	--
	--
	--
	--
	--
	--
	--
	--
	--
	--
	--
	--
	--
	--
	--
	--
	--
	--
	--
	--
	--
	--
	--
	--
	--
	--
	--
	--
	--
	--
	--
	--
	--
	--
	--
	--
	--
	--
	--
	--
	--
	--
	--
	--
	--
	--
	--
	--
	--
	--
	--
	--
	--
	--
	--
	--
	--
	--
	--
	--
	--
	--
	--
	--
	--
	--
	--
	--
	--
	--
	--
	--
	--
	--
	--
	--
	--
	--
	--
	--
	--
	--
	--
	--
	--
	--
	--
	--
	--
	--
	--
	--
	--
	--
	--
	--
	--
	--
	--
	--
	--
	--
	--
	--
	--
	--
	--
	--
	--
	--
	--
	--
	--
	--
	--
	--
	--
	--
	--
	--
	--
	--
	--
	--
	--
	--
	--
	--
	--
	--
	--
	--
	--
	--
	--
	--
	--
	--
	--
	--
	--
	--
	--
	--
	--
	--
	--
	--
	--
	--
	--
	--
	--
	--
	--
	--
	--
	--
	--
	--
	--
	--
	--
	--
	--
	--
	--
	--
	--
	--
	--
	--
	--
	--
	--
	--
	--
	--
	--
	--
	--
	--
	--
	--
	--
	--
	--
	--
	--
	--
	--
	--
	--
	--
	--
	--
	--
	--
	--
	--
	--
	--
	--
	--
	--
	--
	--
	--
	--
	--
	--
	--
	--
	--
	--
	--
	--
	--
	--
	--
	--
	--
	--
	--
	--
	--
	--
	--
	--
	--
	--
	--
	--
	--
	--
	--
	--
	--
	--
	--
	--
	--
	--
	--
	--
	--
	--
	--
	--
	--
	--
	--
	--
	--
	--
	--
	--
	--
	--
	--
	--
	--
	--
	--
	--
	--
	--
	--
	--
	--
	--
	--
	--
	--
	--
	--
	--
	--
	--
	--
	--
	--
	--
	--
	--
	--
	--
	--
	--
	--
	--
	--
	--
	--
	--
	--
	--
	--
	--
	--
	--
	--
	--
	--
	--
	--
	--
	--
	--
	--
	--
	--
	--
	--
	--
	--
	--
	--
	--
	--
	--
	--
	--
	--
	--
	--
	--
	--
	--
	--
	--
	--
	--
	--
	--
	--
	--
	--
	--
	--
	--
	--
	--
	--
	--
	--
	--
	--
	--
	--
	--
	--
	--
	--
	--
	--
	--
	--
	--
	--
	--
	--
	--
	--
	--
	--
	--
	--
	--
	--
	--
	--
	--
	--
	--
	--
	--
	--
	--
	--
	--
	--
	--
	--
	--
	--
	--
	--
	--
	--
	--
	--
	--
	--
	--
	--
	--
	--
	--
	--
	--
	--
	--
	--
	--
	--
	--
	--
	--
	--
	--
	--
	--
	--
	--
	--
	--
	--
	--
	--
	--
	--
	--
	--
	--
	--
	--
	--
	--
	--
	--
	--
	--
	--
	--
	--
	--
	--
	--
	--
	--
	--
	--
	--
	--
	--
	--
	--
	--
	--
	--
	--
	--

## Sheet: F (Actinic Flux)
Actinic Flux
WL	M60_350
280	4.729e-16
281	3.278e-13
282	6.296e-11
283	1.751e-09
284	4.77e-07
285	1.964e-05
286	0.001588
287	0.07976
288	4.422
289	139
290	2454
291	42260
292	410500
293	4440000
294	23820000
295	181100000
296	794400000
297	3425000000
298	8094000000
299	34490000000
300	53100000000
301	180700000000
302	321200000000
303	833100000000
304	1163000000000
305	2204000000000
306	2694000000000
307	5239000000000
308	6593000000000
309	7086000000000
310	11130000000000
311	15750000000000
312	18150000000000
313	21480000000000
314	24740000000000
315	26260000000000
316	29190000000000
317	41500000000000
318	36110000000000
319	45080000000000
320	56320000000000
321	52400000000000
322	49570000000000
323	56950000000000
324	66880000000000
325	74280000000000
326	96780000000000
327	88530000000000
328	82150000000000
329	112500000000000
330	100600000000000
331	99410000000000
332	101900000000000
333	94700000000000
334	107100000000000
335	110900000000000
336	86610000000000
337	94330000000000
338	101800000000000
339	111300000000000
340	118700000000000
341	106800000000000
342	119000000000000
343	123700000000000
344	86790000000000
345	120400000000000
346	112500000000000
347	110400000000000
348	122000000000000
349	102600000000000
350	144300000000000
351	124800000000000
352	113000000000000
353	136700000000000
354	148600000000000
355	139400000000000
356	129900000000000
357	110800000000000
358	85880000000000
359	145100000000000
360	135000000000000
361	122100000000000
362	144000000000000
363	128600000000000
364	140700000000000
365	172100000000000
366	182800000000000
367	174200000000000
368	153600000000000
369	184900000000000
370	168300000000000
371	193300000000000
372	143300000000000
373	130000000000000
374	143100000000000
375	162100000000000
376	162400000000000
377	194100000000000
378	212300000000000
379	157600000000000
380	190200000000000
381	179300000000000
382	119900000000000
383	105600000000000
384	159100000000000
385	157900000000000
386	161500000000000
387	150600000000000
388	151500000000000
389	191600000000000
390	188900000000000
391	224800000000000
392	169100000000000
393	73770000000000
394	174200000000000
395	224800000000000
396	132400000000000
397	153300000000000
398	264300000000000
399	275800000000000
400	290900000000000
401	300300000000000
402	312800000000000
403	287200000000000
404	282600000000000
405	294500000000000
406	278300000000000
407	281400000000000
408	314400000000000
409	309200000000000
410	269000000000000
411	324300000000000
412	322400000000000
413	313700000000000
414	323400000000000
415	310300000000000
416	338700000000000
417	310600000000000
418	314000000000000
419	325300000000000
420	328000000000000
421	343200000000000
422	305300000000000
423	333900000000000
424	336000000000000
425	326600000000000
426	331100000000000
427	304000000000000
428	323100000000000
429	296300000000000
430	219300000000000
431	308100000000000
432	330000000000000
433	363800000000000
434	315300000000000
435	359800000000000
436	388000000000000
437	366900000000000
438	328100000000000
439	373500000000000
440	353500000000000
441	396400000000000
442	413700000000000
443	398700000000000
444	412500000000000
445	391400000000000
446	390600000000000
447	427300000000000
448	415100000000000
449	414400000000000
450	445900000000000
451	440500000000000
452	423300000000000
453	409400000000000
454	436500000000000
455	421300000000000
456	451200000000000
457	456500000000000
458	428600000000000
459	439500000000000
460	446300000000000
461	459800000000000
462	459900000000000
463	452900000000000
464	439900000000000
465	449400000000000
466	438300000000000
467	455100000000000
468	447600000000000
469	455500000000000
470	429400000000000
471	450000000000000
472	472400000000000
473	448700000000000
474	472000000000000
475	465200000000000
476	453500000000000
477	484900000000000
478	473200000000000
479	479200000000000
480	471400000000000
481	483200000000000
482	481600000000000
483	472200000000000
484	464800000000000
485	445200000000000
486	370600000000000
487	432300000000000
488	467400000000000
489	466200000000000
490	486600000000000
491	470600000000000
492	439800000000000
493	474900000000000
494	482800000000000
495	467500000000000
496	493600000000000
497	489200000000000
498	453200000000000
499	479900000000000
500	446600000000000
501	442800000000000
502	457600000000000
503	477100000000000
504	454700000000000
505	472400000000000
506	482300000000000
507	474200000000000
508	452300000000000
509	480900000000000
510	461700000000000
511	482300000000000
512	466100000000000
513	464700000000000
514	444200000000000
515	471900000000000
516	427000000000000
517	412900000000000
518	418000000000000
519	451600000000000
520	462600000000000
521	471200000000000
522	463900000000000
523	473100000000000
524	492800000000000
525	483600000000000
526	445000000000000
527	440100000000000
528	479700000000000
529	488400000000000
530	491300000000000
531	500300000000000
532	461100000000000
533	484600000000000
534	476000000000000
535	499800000000000
536	487200000000000
537	477500000000000
538	493100000000000
539	471300000000000
540	467700000000000
541	481900000000000
542	491500000000000
543	475800000000000
544	493600000000000
545	500400000000000
546	497600000000000
547	487200000000000
548	497000000000000
549	504000000000000
550	501400000000000
551	499200000000000
552	501200000000000
553	499000000000000
554	506400000000000
555	508500000000000
556	496700000000000
557	488400000000000
558	484400000000000
559	477100000000000
560	486900000000000
561	489200000000000
562	488500000000000
563	495800000000000
564	496300000000000
565	488100000000000
566	479400000000000
567	503700000000000
568	483000000000000
569	498400000000000
570	484600000000000
571	477100000000000
572	508300000000000
573	505900000000000
574	503800000000000
575	495000000000000
576	499600000000000
577	505000000000000
578	484900000000000
579	498700000000000
580	504400000000000
581	502900000000000
582	512800000000000
583	510500000000000
584	511400000000000
585	495900000000000
586	501600000000000
587	513200000000000
588	508100000000000
589	435300000000000
590	506400000000000
591	503900000000000
592	511600000000000
593	501800000000000
594	509800000000000
595	497200000000000
596	508300000000000
597	504100000000000
598	495300000000000
599	501200000000000
600	496200000000000
601	492500000000000
602	486600000000000
603	507500000000000
604	505700000000000
605	504200000000000
606	505700000000000
607	514700000000000
608	502600000000000
609	508400000000000
610	499600000000000
611	514900000000000
612	503500000000000
613	497400000000000
614	509100000000000
615	508200000000000
616	490600000000000
617	499000000000000
618	516900000000000
619	513200000000000
620	521800000000000
621	515600000000000
622	516400000000000
623	507200000000000
624	503800000000000
625	504700000000000
626	516900000000000
627	524400000000000
628	521600000000000
629	522100000000000
630	515600000000000
631	511100000000000
632	518500000000000
633	517300000000000
634	517100000000000
635	527500000000000
636	513600000000000
637	530000000000000
638	528500000000000
639	525000000000000
640	512700000000000
641	518400000000000
642	523400000000000
643	525500000000000
644	526500000000000
645	516800000000000
646	524400000000000
647	526400000000000
648	531000000000000
649	504300000000000
650	527200000000000
651	531900000000000
652	526400000000000
653	530100000000000
654	524000000000000
655	509400000000000
656	411700000000000
657	504700000000000
658	522100000000000
659	515900000000000
660	526500000000000
661	525800000000000
662	528600000000000
663	518700000000000
664	521300000000000
665	529600000000000
666	523300000000000
667	527700000000000
668	535200000000000
669	536300000000000
670	534700000000000
671	528700000000000
672	536300000000000
673	541500000000000
674	540400000000000
675	536100000000000
676	538200000000000
677	537200000000000
678	533600000000000
679	532700000000000
680	531000000000000
681	534200000000000
682	537800000000000
683	537100000000000
684	527000000000000
685	535000000000000
686	537200000000000
687	540900000000000
688	533500000000000
689	539800000000000
690	536600000000000
691	532600000000000
692	535800000000000
693	539500000000000
694	538800000000000
695	539700000000000
696	542800000000000
697	539200000000000
698	536700000000000
699	545700000000000
700	531300000000000
701	530100000000000
702	534900000000000
703	536400000000000
704	540300000000000
705	540500000000000
706	537800000000000
707	537400000000000
708	532900000000000
709	531900000000000
710	538300000000000
711	531300000000000
712	529300000000000
713	529500000000000
714	531500000000000
715	527300000000000
716	522600000000000
717	534700000000000
718	518600000000000
719	522100000000000
720	520200000000000
721	528300000000000
722	520100000000000
723	528300000000000
724	527300000000000
725	525300000000000
726	523800000000000
727	527200000000000
728	518400000000000
729	508400000000000
730	523200000000000
731	520000000000000
732	517500000000000
733	523400000000000
734	525600000000000
735	515800000000000
736	519100000000000
737	521100000000000
738	512100000000000
739	511200000000000
740	514400000000000
741	501300000000000
742	510100000000000
743	521400000000000
744	510200000000000
745	523400000000000
746	517600000000000
747	521300000000000
748	522200000000000
749	511600000000000

## Sheet: Figure S6
										PCO, This work, (sol.)		PCO, This work (estimated gas)		MEK, This work (sol.)		MEK, Martinez et al., 1992 (gas)
										Wavelength (nm)	J (s-1 nm-1)	Wavelength (nm)	J (s-1 nm-1)	Wavelength (nm)	J (s-1 nm-1)	Wavelength (nm)	J (s-1 nm-1)
										240	--	240	--	280	4.64061e-36	200	--
										241	--	241	--	281	3.2505e-33	201	--
										242	--	242	--	282	6.20102e-31	202	--
										243	--	243	--	283	1.7221e-29	203	--
										244	--	244	--	284	4.55121e-27	204	--
										245	--	245	--	285	1.84305e-25	205	--
										246	--	246	--	286	1.50575e-23	206	--
										247	--	247	--	287	7.2054e-22	207	--
										248	--	248	--	288	3.99363e-20	208	--
										249	--	249	--	289	1.23476e-18	209	--
										250	--	250	--	290	2.11197e-17	210	--
										251	--	251	--	291	3.59618e-16	211	--
										252	--	252	--	292	3.32191e-15	212	--
										253	--	253	--	293	3.40543e-14	213	--
										254	--	254	--	294	1.7969e-13	214	--
										255	--	255	--	295	1.32417e-12	215	--
										256	--	256	--	296	5.54761e-12	216	--
										257	--	257	--	297	2.29212e-11	217	--
										258	--	258	--	298	5.13738e-11	218	--
										259	--	259	--	299	2.10872e-10	219	--
										260	--	260	--	300	3.12754e-10	220	--
										261	--	261	--	301	1.00403e-09	221	--
										262	--	262	--	302	1.625e-09	222	--
										263	--	263	--	303	3.89825e-09	223	--
										264	--	264	--	304	5.05546e-09	224	--
										265	--	265	--	305	9.07248e-09	225	--
										266	--	266	--	306	1.01873e-08	226	--
										267	--	267	--	307	1.87316e-08	227	--
										268	--	268	--	308	2.06601e-08	228	--
										269	--	269	--	309	2.09364e-08	229	--
										270	--	270	--	310	3.1222e-08	230	--
										271	--	271	--	311	4.00032e-08	231	--
										272	--	272	--	312	4.14236e-08	232	--
										273	--	273	--	313	4.04473e-08	233	--
										274	--	274	--	314	4.34632e-08	234	--
										275	--	275	--	315	3.92338e-08	235	--
										276	--	276	--	316	3.81975e-08	236	--
										277	--	277	--	317	4.37763e-08	237	--
										278	--	278	--	318	3.59048e-08	238	--
										279	--	279	--	319	3.73338e-08	239	--
										280	5.66881e-36	280	5.38537e-36	320	4.56994e-08	240	--
										281	3.98954e-33	281	3.79006e-33	321	2.61861e-08	241	--
										282	7.79088e-31	282	7.40134e-31	322	2.38142e-08	242	--
										283	2.17031e-29	283	2.0618e-29	323	2.61127e-08	243	--
										284	5.94142e-27	284	5.64435e-27	324	1.74002e-08	244	--
										285	2.47033e-25	285	2.34681e-25	325	2.06649e-08	245	--
										286	1.99254e-23	286	1.89291e-23	326	3.07886e-08	246	--
										287	9.99162e-22	287	9.49204e-22	327	8.66586e-09	247	--
										288	5.553e-20	288	5.27535e-20	328	1.13214e-08	248	--
										289	1.73419e-18	289	1.64748e-18	329	1.07224e-08	249	--
										290	3.03416e-17	290	2.88246e-17	330	1.37345e-08	250	--
										291	5.19926e-16	291	4.9393e-16	331	7.55422e-09	251	--
										292	4.95006e-15	292	4.70256e-15	332	1.15495e-08	252	--
										293	5.29976e-14	293	5.03477e-14	333	5.12279e-09	253	--
										294	2.84325e-13	294	2.70109e-13	334	1.61392e-08	254	--
										295	2.12848e-12	295	2.02206e-12	335	-1.14269e-09	255	--
										296	9.03729e-12	296	8.58542e-12	399.3	--	256	--
										297	3.80567e-11	297	3.61538e-11	399.4	--	257	--
										298	8.70508e-11	298	8.26982e-11	399.5	--	258	--
										299	3.59699e-10	299	3.41714e-10	399.6	--	259	--
										300	5.27284e-10	300	5.0092e-10	399.7	--	260	--
										301	1.72994e-09	301	1.64345e-09	399.8	--	261	--
										302	2.96708e-09	302	2.81872e-09	399.9	--	262	--
										303	7.50058e-09	303	7.12555e-09	400	--	263	--
										304	1.00562e-08	304	9.55336e-09		--	264	--
										305	1.84963e-08	305	1.75715e-08		--	265	--
										306	2.15109e-08	306	2.04354e-08		--	266	--
										307	3.88975e-08	307	3.69526e-08		--	267	--
										308	4.55259e-08	308	4.32496e-08		--	268	--
										309	4.49608e-08	309	4.27128e-08		--	269	--
										310	6.56326e-08	310	6.2351e-08		--	270	--
										311	8.35725e-08	311	7.93939e-08		--	271	--
										312	8.78042e-08	312	8.3414e-08		--	272	--
										313	9.64758e-08	313	9.1652e-08		--	273	--
										314	1.03307e-07	314	9.81414e-08		--	274	--
										315	1.00828e-07	315	9.57869e-08		--	275	--
										316	1.01079e-07	316	9.60247e-08		--	276	--
										317	1.28067e-07	317	1.21664e-07		--	277	--
										318	1.04446e-07	318	9.92234e-08		--	278	--
										319	1.06516e-07	319	1.01191e-07		--	279	--
										320	1.22177e-07	320	1.16068e-07		--	280	4.39608e-36
										321	9.33927e-08	321	8.87231e-08		--	281	3.03674e-33
										322	7.37084e-08	322	7.0023e-08		--	282	5.79232e-31
										323	6.67018e-08	323	6.33667e-08		--	283	1.59411e-29
										324	6.19845e-08	324	5.88853e-08		--	284	4.28918e-27
										325	5.74951e-08	325	5.46203e-08		--	285	1.73775e-25
										326	5.42118e-08	326	5.15012e-08		--	286	1.3822e-23
										327	4.05741e-08	327	3.85454e-08		--	287	6.82746e-22
										328	2.25901e-08	328	2.14606e-08		--	288	3.72156e-20
										329	2.63527e-08	329	2.50351e-08		--	289	1.14758e-18
										330	1.53686e-08	330	1.46002e-08		--	290	1.97498e-17
										331	-2.02491e-09	331	-1.92366e-09		--	291	3.30642e-16
										332	-9.34033e-09	332	-8.87332e-09		--	292	3.1001e-15
										333	-1.15738e-08	333	-1.09951e-08		--	293	3.22522e-14
										334	-9.81697e-09	334	-9.32613e-09		--	294	1.66549e-13
											--	335	--		--	295	1.21989e-12
											--	336	--		--	296	5.16042e-12
											--	337	--		--	297	2.14268e-11
											--	338	--		--	298	4.86935e-11
											--	339	--		--	299	1.98662e-10
											--	340	--		--	300	2.90563e-10
											--	341	--		--	301	9.30966e-10
											--	342	--		--	302	1.55204e-09
											--	343	--		--	303	3.75895e-09
											--	344	--		--	304	4.8939e-09
											--	345	--		--	305	8.67494e-09
											--	346	--		--	306	9.91392e-09
											--	347	--		--	307	1.80222e-08
											--	348	--		--	308	2.09921e-08
											--	349	--		--	309	2.08612e-08
											--	350	--		--	310	3.00955e-08
											--		--		--	311	3.8556e-08
											--		--		--	312	4.00752e-08
											--		--		--	313	4.26163e-08
											--		--		--	314	4.39382e-08
											--		--		--	315	4.16799e-08
											--		--		--	316	4.12396e-08
											--		--		--	317	5.19912e-08
													--		--	318	3.99232e-08
													--		--	319	4.36374e-08
													--		--	320	4.73088e-08
													--		--	321	3.78957e-08
													--		--	322	3.06937e-08
													--		--	323	2.98874e-08
													--		--	324	2.96412e-08
													--		--	325	2.75727e-08
													--		--	326	3.00405e-08
													--		--	327	2.2947e-08
													--		--	328	1.7613e-08
													--		--	329	1.998e-08
													--		--	330	1.44542e-08
													--		--	331	1.15475e-08
													--		--	332	9.63566e-09
													--		--	333	7.24266e-09
													--		--	334	6.6145e-09
													--		--	335	5.51838e-09
													--		--		--
													--		--		--
													--		--		--
													--		--		--
													--		--		--
													--		--		--
													--		--		--
													--		--		--
													--		--		--
													--		--		--
													--		--		--
													--		--		--
													--		--		--
													--		--		--
													--		--		--
													--		--		--
													--		--		--
													--		--		--
													--		--		--
													--		--		--
													--		--		--
													--		--		--
													--		--		--
													--		--		--
													--		--		--
													--				--
													--				--
													--				--
													--				--
													--				--
													--				--
													--				--
													--				--
													--				--
													--				--
													--				--
													--				--
													--				--
													--				--
													--				--
													--				--
													--				--
													--				--
													--				--
													--				--
													--				--
													--				--
													--				--
													--				--
													--				--
													--				--
													--				--
													--				--
													--				--
													--				--
													--				--
													--				--
													--				--
													--				--
													--				--
													--				--
													--				--
													--				--
													--				--
													--				--
													--				--
													--				--
													--				--
													--				--
													--				--
													--				--
													--				--
													--				--
													--				--
													--				--
													--				--
													--				--
													--				--
													--				--
													--				--
													--				--
													--				--
													--				--
													--				--
													--				--
													--				--
													--				--
													--				--
													--				--
													--				--
													--				--
													--				--
													--				--
													--				--
													--				--
													--				--
													--				--
													--				--
													--				--
													--				--
													--				--
													--				--
													--				--
													--				--
													--				--
													--				--
													--				--
													--				--
													--
													--
													--
													--
													--
													--
													--
													--
													--
													--
													--
													--
													--
													--
													--
													--
													--
													--
													--
													--
													--
													--
													--
													--
													--
													--
													--
													--
													--
													--
													--
													--
													--
													--
													--
													--
													--
													--
													--
													--
													--
													--
													--
													--
													--
													--
													--
													--
													--
													--
													--
													--
													--
													--
													--
													--
													--
													--
													--
													--
													--
													--
													--
													--
													--
													--
													--
													--
													--
													--
													--
													--
													--
													--
													--
													--
													--
													--
													--
													--
													--
													--
													--
													--
													--
													--
													--
													--
													--
													--
													--
													--
													--
													--
													--
													--
													--
													--
													--
													--
													--
													--
													--
													--
													--
													--
													--
													--
													--
													--
													--
													--
													--
													--
													--
													--
													--
													--
													--
													--
													--
													--
													--
													--
													--
													--
													--
													--
													--
													--
													--
													--
													--
													--
													--
													--
													--
													--
													--
													--
													--
													--
													--
													--
													--
													--
													--
													--
													--
													--
													--
													--
													--
													--
													--
													--
													--
													--
													--
													--
													--
													--
													--
													--
													--
													--
													--
													--
													--
													--
													--
													--
													--
													--
													--
													--
													--
													--
													--
													--
													--
													--
													--
													--
													--
													--
													--
													--
													--
													--
													--
													--
													--
													--
													--
													--
													--
													--
													--
													--
													--
													--
													--
													--
													--
													--
													--
													--
													--
													--
													--
													--
													--
													--
													--
													--
													--
													--
													--
													--
													--
													--
													--
													--
													--
													--
													--
													--
													--
													--
													--
													--
													--
													--
													--
													--
													--
													--
													--
													--
													--
													--
													--
													--
													--
													--
													--
													--
													--
													--
													--
													--
													--
													--
													--
													--
													--
													--
													--
													--
													--
													--
													--
													--
													--
													--
													--
													--
													--
													--
													--
													--
													--
													--
													--
													--
													--
													--
													--
													--
													--
													--
													--
													--
													--
													--
													--
													--
													--
													--
													--
													--
													--
													--
													--
													--
													--
													--
													--
													--
													--
													--
													--
													--
													--
													--
													--
													--
													--
													--
													--
													--
													--
													--
													--
													--
													--
													--
													--
													--
													--
													--
													--
													--
													--
													--
													--
													--
													--
													--
													--
													--
													--
													--
													--
													--
													--
													--
													--
													--
													--
													--
													--
													--
													--
													--
													--
													--
													--
													--
													--
													--
													--
													--
													--
													--
													--
													--
													--
													--
													--
													--
													--
													--
													--
													--
													--
													--
													--
													--
													--
													--
													--
													--
													--
													--
													--
													--
													--
													--
													--
													--
													--
													--
													--
													--
													--
													--
													--
													--
													--
													--
													--
													--
													--
													--
													--
													--
													--
													--
													--
													--
													--
													--
													--
													--
													--
													--
													--
													--
													--
													--
													--
													--
													--
													--
													--
													--
													--
													--
													--
													--
													--
													--
													--
													--
													--
													--
													--
													--
													--
													--
													--
													--
													--
													--
													--
													--
													--
													--
													--
													--
													--
													--
													--
													--
													--
													--
													--
													--
													--
													--
													--
													--
													--
													--
													--
													--
													--
													--
													--
													--
													--
													--
													--
													--
													--
													--
													--
													--
													--
													--
													--
													--
													--
													--
													--
													--
													--
													--
													--
													--
													--
													--
													--
													--
													--
													--
													--
													--
													--
													--
													--
													--
													--
													--
													--
													--
													--
													--
													--
													--
													--
													--
													--
													--
													--
													--
													--
													--
													--
													--
													--
													--
													--
													--
													--
													--
													--
													--
													--
													--
													--
													--
													--
													--
													--
													--
													--
													--
													--
													--
													--
													--
													--
													--
													--
													--
													--
													--
													--
													--
													--
													--
													--
													--
													--
													--
													--
													--
													--
													--
													--
													--
													--
													--
													--
													--
													--
													--
													--
													--
													--
													--
													--
													--
													--
													--
													--
													--
													--
													--
													--
													--
													--
													--
													--
													--
													--
													--
													--
													--
													--
													--
													--
													--
													--
													--
													--
													--
													--
													--
													--
													--
													--
													--
													--
													--
													--
													--
													--
													--
													--
													--
													--
													--
													--
													--
													--
													--
													--
													--
													--
													--
													--
													--
													--
													--
													--
													--
													--
													--
													--
													--
													--
													--
													--
													--
													--
													--
													--
													--
													--
													--
													--
													--
													--
													--
													--
													--
													--
													--
													--
													--
													--
													--
													--
													--
													--
													--
													--
													--
													--
													--
													--
													--
													--
													--
													--
													--
													--
													--
													--
													--
													--
													--
													--
													--
													--
													--
													--
													--
													--
													--
													--
													--
													--
													--
													--
													--
													--
													--
													--
													--
													--
													--
													--
													--
													--
													--
													--
													--
													--
													--
													--
													--
													--
													--
													--
													--
													--
													--
													--
													--
													--
													--
													--
													--
													--
													--
													--
													--
													--
													--
													--
													--
													--
													--
													--
													--
													--
													--
													--
													--
													--
													--
													--
													--
													--
													--
													--
													--
													--
													--
													--
													--
													--
													--
													--
													--
													--
													--
													--
													--
													--
													--
													--
													--
													--
													--
													--
													--
													--
													--
													--
													--
													--
													--
													--
													--
													--
													--
													--
													--
													--
													--
													--
													--
													--
													--
													--
													--
													--
													--
													--
													--
													--
													--
													--
													--
													--
													--
													--
													--
													--
													--
													--
													--
													--
													--
													--
													--
													--
													--
													--
													--
													--
													--
													--
													--
													--
													--
													--
													--
													--
													--
													--
													--
													--
													--
													--
													--
													--
													--
													--
													--
													--
													--
													--
													--
													--
													--
													--
													--
													--
													--
													--
													--
													--
													--
													--
													--
													--
													--
													--
													--
													--
													--
													--
													--
													--
													--
													--
													--
													--
													--
													--
													--
													--
													--
													--
													--
													--
													--
													--
													--
													--
													--
													--
													--
													--
													--
													--
													--
													--
													--
													--
													--
													--
													--
													--
													--
													--
													--
													--
													--
													--
													--
													--
													--
													--
													--
													--
													--
													--
													--
													--
													--
													--
													--
													--
													--
													--
													--
													--
													--
													--
													--
													--
													--
													--
													--
													--
													--
													--
													--
													--
													--
													--
													--
													--
													--
													--
													--
													--
													--
													--
													--
													--
													--
													--
													--
													--
													--
													--
													--
													--
													--
													--
													--
													--
													--
													--
													--
													--
													--
													--
													--
													--
													--
													--
													--
													--
													--
													--
													--
													--
													--
													--
													--
													--
													--
													--
													--
													--
													--
													--
													--
													--
													--
													--
													--
													--
													--
													--
													--
													--
													--
													--
													--
													--
													--
													--
													--
													--
													--
													--
													--
													--
													--
													--
													--
													--
													--
													--
													--
													--
													--
													--
													--
													--
													--
													--
													--
													--
													--
													--
													--
													--
													--
													--
													--
													--
													--
													--
													--
													--
													--
													--
													--
													--
													--
													--
													--
													--
													--
													--
													--
													--
													--
													--
													--
													--
													--
													--
													--
													--
													--
													--
													--
													--
													--
													--
													--
													--
													--
													--
													--
													--
													--
													--
													--
													--
													--
													--
													--
													--
													--
													--
													--
													--
													--
													--
													--
													--
													--
													--
													--
													--
													--
													--
													--
													--
													--
													--
													--
													--
													--
													--
													--
													--
													--
													--
													--
													--
													--
													--
													--
													--
													--
													--
													--
													--
													--
													--
													--
													--
													--
													--
													--
													--
													--
													--
													--
													--
													--
													--
													--
													--
													--
													--
													--
													--
													--
													--
													--
													--
													--
													--
													--
													--
													--
													--
													--
													--
													--
													--
													--
													--
													--
													--
													--
													--
													--
													--
													--
													--
													--
													--
													--
													--
													--
													--
													--
													--
													--
													--
													--
													--
													--
													--
													--
													--
													--
													--
													--
													--
													--
													--
													--
													--
													--
													--
													--
													--
													--
													--
													--
													--
													--
													--
													--
													--
													--
													--
													--
													--
													--
													--
													--
													--
													--
													--
													--
													--
													--
													--
													--
													--
													--
													--
													--
													--
													--
													--
													--
													--
													--
													--
													--
													--
													--
													--
													--
													--
													--
													--
													--
													--
													--
													--
													--
													--
													--
													--
													--
													--
													--
													--
													--
													--
													--
													--
													--
													--
													--
													--
													--
													--
													--
													--
													--
													--
													--
													--
													--
													--
													--
													--
													--
													--
													--
													--
													--
													--
													--
													--
													--
													--
													--
													--
													--
													--
													--
													--
													--
													--
													--
													--
													--
													--
													--
													--
													--
													--
													--
													--
													--
													--
													--
													--
													--
													--
													--
													--
													--
													--
													--
													--
													--
													--
													--
													--
													--
													--
													--
													--
													--
													--
													--
													--
													--
													--
													--
													--
													--
													--
													--
													--
													--
													--
													--
													--
													--
													--
													--
													--
													--
													--
													--
													--
													--
													--
													--
													--
													--
													--
													--
													--
													--
													--
													--
													--
													--
													--
													--
													--
													--
													--
													--
													--
													--
													--
													--
													--
													--
													--
													--
													--
													--
													--
													--
													--
													--
													--
													--
													--
													--
													--
													--
													--
													--
													--
													--
													--
													--
													--
													--
													--
													--
													--
													--
													--
													--
													--
													--
													--
													--
													--
													--
													--
													--
													--
													--
													--
													--
													--
													--
													--
													--
													--
													--
													--
													--
													--
													--
													--
													--
													--
													--
													--
													--
													--
													--
													--
													--
													--
													--
													--
													--
													--
													--
													--
													--
													--
													--
													--
													--
													--
													--
													--
													--
													--
													--
													--
													--
													--
													--
													--
													--
													--
													--
													--
													--
													--
													--
													--
													--
													--
													--
													--
													--
													--
													--
													--
													--
													--
													--
													--
													--
													--
													--
													--
													--
													--
													--
													--
													--
													--
													--
													--
													--
													--
													--
													--
													--
													--
													--
													--
													--
													--
													--
													--
													--
													--
													--
													--
													--
													--
													--
													--
													--
													--
													--
													--
													--
													--
													--
													--
													--
													--
													--
													--
													--
													--
													--
													--
													--
													--
													--
													--
													--
													--
													--
													--
													--
													--
													--
													--
													--
													--
													--
													--
													--
													--
													--
													--
													--
													--
													--
													--
													--
													--
													--
													--
													--
													--
													--
													--
													--
													--
													--
													--
													--
													--
													--
													--
													--
													--
													--
													--
													--
													--
													--
													--
													--
													--
													--
													--
													--
													--
													--
													--
													--
													--
													--
													--
													--
													--
													--
													--
													--
													--
													--
													--
													--
													--
													--
													--
													--
													--
													--
													--
													--
													--
													--
													--
													--
													--
													--
													--
													--
													--
													--
													--
													--
													--
													--
													--
													--
													--
													--
													--
													--
													--
													--
													--
													--
													--
													--
													--
													--
													--
													--
													--
													--
													--
													--
													--
													--
													--
													--
													--
													--
													--
													--
													--
													--
													--
													--
													--
													--
													--
													--
													--
													--
													--
													--
													--
													--
													--
													--
													--
													--
													--
													--
													--
													--
													--
													--
													--
													--
													--
													--
													--
													--
													--
													--
													--
													--
													--
													--
													--
													--
													--
													--
													--
													--
													--
													--
													--
													--
													--
													--
													--
													--
													--
													--
													--
													--
													--
													--
													--
													--
													--
													--
													--
													--
													--
													--
													--
													--
													--
													--
													--
													--
													--
													--
													--
													--
													--
													--
													--
													--
													--
													--
													--
													--
													--
													--
													--
													--
													--
													--
													--
													--
													--
													--
													--
													--
													--
													--
													--
													--
													--
													--
													--
													--
													--
													--
													--
													--
													--
													--
													--
													--
													--
													--
													--
													--
													--
													--
													--
													--

## Sheet: POCPe
	PCO			MPA
	EU	USA		EU	USA		Jenkin et al., 2017
A	100	154		100	154
nB	15			15
M	100.16			116.16
gs	0.7			0.6
B	4	1		4	1
gr	0.06			0.07
R	0.2	0.06		0.21	0.06
kOH	1.2e-12			1.3e-12
kOH(ethene)	7.8e-12			7.8e-12
a	0.56	0.37		0.56	0.37
C	0.0038	0.0041		0.0038	0.0041
nC	6			6
b	2.7			2.7
S	0.83	0.75		0.83	0.75
F	1			1
P	14	10		0
R(O3)	0			0
Q	0			0
POCPe	25.5	14.7		10.6	4.3

## Sheet: sigma MPA UV-Vis
Methyl Pivalate UV-vis. Spectrum
Wavelength (nm)	Absorption Cross Section (cm2 molecule-1
250	2.80078e-21
250.1	2.22789e-21
250.2	2.03693e-21
250.3	2.54616e-21
250.4	2.10058e-21
250.5	2.10058e-21
250.6	2.29154e-21
250.7	2.03693e-21
250.8	1.71866e-21
250.9	1.20943e-21
251	1.71866e-21
251.1	1.20943e-21
251.2	1.84597e-21
251.3	1.59135e-21
251.4	1.71866e-21
251.5	1.5277e-21
251.6	1.14577e-21
251.7	8.91156e-22
251.8	1.33673e-21
251.9	1.08212e-21
252	7.63848e-22
252.1	7.63848e-22
252.2	7.00194e-22
252.3	8.27502e-22
252.4	5.09232e-22
252.5	7.63848e-22
252.6	1.01846e-21
252.7	3.81924e-22
252.8	5.09232e-22
252.9	5.09232e-22
253	3.81924e-22
253.1	3.81924e-22
253.2	3.1827e-22
253.3	5.72886e-22
253.4	4.45578e-22
253.5	3.1827e-22
253.6	3.1827e-22
253.7	5.09232e-22
253.8	0
253.9	7.63848e-22
254	3.81924e-22
254.1	6.3654e-22
254.2	8.91156e-22
254.3	4.45578e-22
254.4	0
254.5	4.45578e-22
254.6	1.90962e-22
254.7	4.45578e-22
254.8	3.1827e-22
254.9	3.1827e-22
255	-1.90962e-22
255.1	0
255.2	-5.09232e-22
255.3	0
255.4	0
255.5	-6.3654e-23
255.6	1.27308e-22
255.7	-1.90962e-22
255.8	5.72886e-22
255.9	-6.3654e-23
256	-2.54616e-22
256.1	-1.27308e-22
256.2	-6.3654e-23
256.3	-1.27308e-22
256.4	0
256.5	-3.1827e-22
256.6	-5.09232e-22
256.7	-6.3654e-23
256.8	0
256.9	6.3654e-23
257	-2.54616e-22
257.1	-4.45578e-22
257.2	-8.91156e-22
257.3	-1.90962e-22
257.4	1.27308e-22
257.5	-5.09232e-22
257.6	-1.27308e-22
257.7	-1.90962e-22
257.8	-1.27308e-22
257.9	-6.3654e-22
258	-3.1827e-22
258.1	-8.27502e-22
258.2	-4.45578e-22
258.3	-3.1827e-22
258.4	-1.27308e-22
258.5	-3.1827e-22
258.6	-3.81924e-22
258.7	-7.00194e-22
258.8	-3.81924e-22
258.9	-3.1827e-22
259	-9.5481e-22
259.1	-6.3654e-23
259.2	-6.3654e-23
259.3	-2.54616e-22
259.4	-3.1827e-22
259.5	-5.72886e-22
259.6	-5.09232e-22
259.7	3.81924e-22
259.8	-7.00194e-22
259.9	-3.1827e-22
260	-2.54616e-22
260.1	-3.81924e-22
260.2	-1.01846e-21
260.3	-3.81924e-22
260.4	-4.45578e-22
260.5	-2.54616e-22
260.6	-4.45578e-22
260.7	-6.3654e-22
260.8	-5.72886e-22
260.9	-3.1827e-22
261	-1.27308e-22
261.1	-3.1827e-22
261.2	-5.72886e-22
261.3	-3.1827e-22
261.4	-5.09232e-22
261.5	-4.45578e-22
261.6	-1.08212e-21
261.7	-5.09232e-22
261.8	-3.81924e-22
261.9	-6.3654e-22
262	-7.00194e-22
262.1	-3.1827e-22
262.2	-1.27308e-22
262.3	-4.45578e-22
262.4	-5.72886e-22
262.5	-2.54616e-22
262.6	-5.72886e-22
262.7	-2.54616e-22
262.8	-3.1827e-22
262.9	-8.27502e-22
263	-7.63848e-22
263.1	-1.27308e-22
263.2	-5.72886e-22
263.3	-4.45578e-22
263.4	-7.63848e-22
263.5	-5.09232e-22
263.6	-6.3654e-22
263.7	-7.63848e-22
263.8	0
263.9	-3.1827e-22
264	-6.3654e-23
264.1	-4.45578e-22
264.2	-3.1827e-22
264.3	-7.00194e-22
264.4	-2.54616e-22
264.5	-6.3654e-23
264.6	-3.81924e-22
264.7	-2.54616e-22
264.8	0
264.9	-8.91156e-22
265	-8.27502e-22
265.1	-3.81924e-22
265.2	-4.45578e-22
265.3	-7.63848e-22
265.4	-7.00194e-22
265.5	-5.09232e-22
265.6	-8.27502e-22
265.7	-5.72886e-22
265.8	-3.81924e-22
265.9	-5.09232e-22
266	-2.54616e-22
266.1	-5.09232e-22
266.2	-3.81924e-22
266.3	-6.3654e-23
266.4	-3.1827e-22
266.5	-6.3654e-22
266.6	-4.45578e-22
266.7	-3.81924e-22
266.8	-2.54616e-22
266.9	-7.00194e-22
267	-3.1827e-22
267.1	1.90962e-22
267.2	-6.3654e-22
267.3	1.27308e-22
267.4	-6.3654e-23
267.5	-5.09232e-22
267.6	-5.72886e-22
267.7	-4.45578e-22
267.8	-5.09232e-22
267.9	-3.81924e-22
268	6.3654e-23
268.1	-4.45578e-22
268.2	-3.81924e-22
268.3	-5.72886e-22
268.4	-2.54616e-22
268.5	2.54616e-22
268.6	-7.63848e-22
268.7	-1.27308e-22
268.8	-4.45578e-22
268.9	-3.1827e-22
269	-3.81924e-22
269.1	-3.1827e-22
269.2	-6.3654e-23
269.3	-5.09232e-22
269.4	-1.90962e-22
269.5	-3.1827e-22
269.6	-2.54616e-22
269.7	-3.81924e-22
269.8	-3.81924e-22
269.9	6.3654e-22
270	-7.00194e-22
270.1	-3.81924e-22
270.2	-4.45578e-22
270.3	-3.1827e-22
270.4	-5.72886e-22
270.5	-4.45578e-22
270.6	-2.54616e-22
270.7	-4.45578e-22
270.8	-5.09232e-22
270.9	-2.54616e-22
271	-5.09232e-22
271.1	-3.81924e-22
271.2	-1.90962e-22
271.3	1.27308e-22
271.4	-6.3654e-22
271.5	-8.91156e-22
271.6	-2.54616e-22
271.7	-5.72886e-22
271.8	-3.1827e-22
271.9	-1.90962e-22
272	-5.72886e-22
272.1	-2.54616e-22
272.2	-6.3654e-23
272.3	-8.91156e-22
272.4	6.3654e-23
272.5	-6.3654e-23
272.6	0
272.7	-8.27502e-22
272.8	-1.27308e-22
272.9	-1.27308e-22
273	-5.09232e-22
273.1	-3.1827e-22
273.2	-4.45578e-22
273.3	-1.27308e-22
273.4	-2.54616e-22
273.5	-3.81924e-22
273.6	-4.45578e-22
273.7	-6.3654e-22
273.8	-4.45578e-22
273.9	-3.81924e-22
274	-6.3654e-23
274.1	-6.3654e-23
274.2	-1.27308e-22
274.3	-4.45578e-22
274.4	-1.27308e-22
274.5	-5.72886e-22
274.6	-3.1827e-22
274.7	2.54616e-22
274.8	-6.3654e-23
274.9	-5.72886e-22
275	-3.1827e-22
275.1	6.3654e-23
275.2	2.54616e-22
275.3	-2.54616e-22
275.4	-6.3654e-23
275.5	5.72886e-22
275.6	-3.81924e-22
275.7	-1.27308e-22
275.8	-6.3654e-23
275.9	1.27308e-22
276	0
276.1	-8.27502e-22
276.2	0
276.3	-1.90962e-22
276.4	-2.54616e-22
276.5	-3.81924e-22
276.6	6.3654e-23
276.7	-6.3654e-23
276.8	-1.27308e-22
276.9	-3.81924e-22
277	-4.45578e-22
277.1	-3.81924e-22
277.2	-1.90962e-22
277.3	-1.90962e-22
277.4	0
277.5	-2.54616e-22
277.6	1.90962e-22
277.7	-3.1827e-22
277.8	-6.3654e-23
277.9	-5.72886e-22
278	-1.27308e-22
278.1	6.3654e-23
278.2	3.1827e-22
278.3	-2.54616e-22
278.4	-6.3654e-23
278.5	0
278.6	-1.27308e-22
278.7	6.3654e-23
278.8	-6.3654e-23
278.9	3.1827e-22
279	-1.27308e-22
279.1	-2.54616e-22
279.2	3.81924e-22
279.3	-1.27308e-22
279.4	-6.3654e-23
279.5	-2.54616e-22
279.6	1.27308e-22
279.7	0
279.8	-2.54616e-22
279.9	-5.72886e-22
280	-6.3654e-23
280.1	1.27308e-22
280.2	-5.09232e-22
280.3	3.1827e-22
280.4	-2.54616e-22
280.5	4.45578e-22
280.6	-1.90962e-22
280.7	1.27308e-22
280.8	-1.90962e-22
280.9	-1.27308e-22
281	-1.27308e-22
281.1	-1.27308e-22
281.2	-3.1827e-22
281.3	1.90962e-22
281.4	0
281.5	-1.90962e-22
281.6	1.27308e-22
281.7	-1.27308e-22
281.8	1.90962e-22
281.9	-2.54616e-22
282	-2.54616e-22
282.1	2.54616e-22
282.2	1.27308e-22
282.3	1.90962e-22
282.4	-1.27308e-22
282.5	0
282.6	-3.81924e-22
282.7	-1.27308e-22
282.8	0
282.9	0
283	1.90962e-22
283.1	1.27308e-22
283.2	-7.00194e-22
283.3	-1.90962e-22
283.4	-6.3654e-23
283.5	1.27308e-22
283.6	-2.54616e-22
283.7	-3.81924e-22
283.8	3.81924e-22
283.9	-6.3654e-23
284	4.45578e-22
284.1	-5.72886e-22
284.2	7.63848e-22
284.3	-6.3654e-23
284.4	0
284.5	1.27308e-22
284.6	-1.27308e-22
284.7	-1.27308e-22
284.8	0
284.9	3.1827e-22
285	0
285.1	-6.3654e-23
285.2	-1.90962e-22
285.3	-4.45578e-22
285.4	3.81924e-22
285.5	6.3654e-23
285.6	4.45578e-22
285.7	2.54616e-22
285.8	-2.54616e-22
285.9	-2.54616e-22
286	-6.3654e-23
286.1	1.27308e-22
286.2	0
286.3	0
286.4	-2.54616e-22
286.5	-1.27308e-22
286.6	3.81924e-22
286.7	-6.3654e-23
286.8	-5.72886e-22
286.9	2.54616e-22
287	-1.90962e-22
287.1	0
287.2	2.54616e-22
287.3	1.27308e-22
287.4	6.3654e-23
287.5	4.45578e-22
287.6	-1.27308e-22
287.7	-1.27308e-22
287.8	6.3654e-23
287.9	1.90962e-22
288	1.90962e-22
288.1	-3.1827e-22
288.2	1.27308e-22
288.3	3.1827e-22
288.4	-1.90962e-22
288.5	0
288.6	1.90962e-22
288.7	-6.3654e-23
288.8	6.3654e-22
288.9	-5.09232e-22
289	3.1827e-22
289.1	3.81924e-22
289.2	-2.54616e-22
289.3	3.81924e-22
289.4	1.27308e-22
289.5	1.90962e-22
289.6	6.3654e-23
289.7	-1.90962e-22
289.8	3.81924e-22
289.9	-6.3654e-23
290	6.3654e-23
290.1	-2.54616e-22
290.2	-3.1827e-22
290.3	0
290.4	-1.90962e-22
290.5	2.54616e-22
290.6	3.1827e-22
290.7	2.54616e-22
290.8	6.3654e-23
290.9	-6.3654e-23
291	-6.3654e-23
291.1	-5.72886e-22
291.2	6.3654e-23
291.3	1.27308e-22
291.4	1.27308e-22
291.5	0
291.6	-1.27308e-22
291.7	0
291.8	0
291.9	2.54616e-22
292	-3.1827e-22
292.1	1.90962e-22
292.2	6.3654e-23
292.3	0
292.4	-6.3654e-22
292.5	6.3654e-22
292.6	-1.90962e-22
292.7	1.27308e-22
292.8	-2.54616e-22
292.9	0
293	1.27308e-22
293.1	-1.90962e-22
293.2	4.45578e-22
293.3	3.81924e-22
293.4	-2.54616e-22
293.5	6.3654e-23
293.6	1.90962e-22
293.7	0
293.8	5.09232e-22
293.9	3.1827e-22
294	-4.45578e-22
294.1	2.54616e-22
294.2	0
294.3	-3.1827e-22
294.4	1.27308e-22
294.5	2.54616e-22
294.6	-4.45578e-22
294.7	5.09232e-22
294.8	0
294.9	-1.90962e-22
295	1.27308e-22
295.1	-6.3654e-23
295.2	5.09232e-22
295.3	-6.3654e-23
295.4	-5.09232e-22
295.5	-5.09232e-22
295.6	0
295.7	-2.54616e-22
295.8	-4.45578e-22
295.9	-2.54616e-22
296	3.1827e-22
296.1	-3.1827e-22
296.2	-2.54616e-22
296.3	-2.54616e-22
296.4	-4.45578e-22
296.5	1.27308e-22
296.6	1.90962e-22
296.7	3.81924e-22
296.8	6.3654e-23
296.9	-1.27308e-22
297	1.27308e-22
297.1	-2.54616e-22
297.2	3.81924e-22
297.3	-6.3654e-23
297.4	1.90962e-22
297.5	-6.3654e-23
297.6	-5.09232e-22
297.7	1.90962e-22
297.8	-5.09232e-22
297.9	1.27308e-22
298	-3.81924e-22
298.1	3.1827e-22
298.2	-6.3654e-23
298.3	6.3654e-23
298.4	0
298.5	0
298.6	0
298.7	-1.27308e-22
298.8	0
298.9	1.27308e-22
299	3.81924e-22
299.1	-5.09232e-22
299.2	3.81924e-22
299.3	4.45578e-22
299.4	1.90962e-22
299.5	-4.45578e-22
299.6	6.3654e-23
299.7	-2.54616e-22
299.8	2.54616e-22
299.9	-1.90962e-22
300	2.54616e-22
300.1	-1.90962e-22
300.2	6.3654e-23
300.3	-1.90962e-22
300.4	5.72886e-22
300.5	-6.3654e-23
300.6	6.3654e-23
300.7	-1.90962e-22
300.8	3.81924e-22
300.9	-2.54616e-22
301	-5.09232e-22
301.1	-6.3654e-23
301.2	6.3654e-23
301.3	1.27308e-22
301.4	-4.45578e-22
301.5	-6.3654e-23
301.6	-6.3654e-23
301.7	3.1827e-22
301.8	-5.72886e-22
301.9	0
302	3.1827e-22
302.1	-5.09232e-22
302.2	-1.27308e-22
302.3	-1.90962e-22
302.4	-3.1827e-22
302.5	-1.90962e-22
302.6	0
302.7	-1.27308e-22
302.8	3.1827e-22
302.9	3.81924e-22
303	-1.27308e-22
303.1	1.90962e-22
303.2	6.3654e-23
303.3	0
303.4	2.54616e-22
303.5	6.3654e-23
303.6	-5.72886e-22
303.7	1.90962e-22
303.8	-3.81924e-22
303.9	-6.3654e-23
304	5.72886e-22
304.1	6.3654e-23
304.2	3.81924e-22
304.3	2.54616e-22
304.4	6.3654e-22
304.5	2.54616e-22
304.6	4.45578e-22
304.7	-3.81924e-22
304.8	3.81924e-22
304.9	5.09232e-22
305	-1.90962e-22
305.1	-1.90962e-22
305.2	2.54616e-22
305.3	1.27308e-22
305.4	-1.27308e-22
305.5	-1.90962e-22
305.6	6.3654e-23
305.7	0
305.8	-1.27308e-22
305.9	-6.3654e-23
306	2.54616e-22
306.1	-1.27308e-22
306.2	1.01846e-21
306.3	1.27308e-22
306.4	-6.3654e-23
306.5	1.90962e-22
306.6	-3.81924e-22
306.7	-1.90962e-22
306.8	1.27308e-22
306.9	5.72886e-22
307	0
307.1	6.3654e-23
307.2	-2.54616e-22
307.3	-1.27308e-22
307.4	1.90962e-22
307.5	2.54616e-22
307.6	-6.3654e-23
307.7	-3.81924e-22
307.8	8.27502e-22
307.9	3.1827e-22
308	-1.27308e-22
308.1	1.27308e-22
308.2	3.81924e-22
308.3	-2.54616e-22
308.4	-2.54616e-22
308.5	6.3654e-22
308.6	-2.54616e-22
308.7	4.45578e-22
308.8	-4.45578e-22
308.9	6.3654e-22
309	-6.3654e-23
309.1	3.1827e-22
309.2	6.3654e-23
309.3	-2.54616e-22
309.4	6.3654e-23
309.5	3.81924e-22
309.6	2.54616e-22
309.7	-3.1827e-22
309.8	0
309.9	6.3654e-22
310	1.27308e-22
310.1	0
310.2	7.00194e-22
310.3	8.27502e-22
310.4	5.72886e-22
310.5	1.27308e-22
310.6	5.09232e-22
310.7	6.3654e-23
310.8	1.27308e-22
310.9	-2.54616e-22
311	5.09232e-22
311.1	1.27308e-22
311.2	7.63848e-22
311.3	5.72886e-22
311.4	-1.27308e-22
311.5	0
311.6	-6.3654e-23
311.7	1.90962e-22
311.8	3.1827e-22
311.9	2.54616e-22
312	-6.3654e-23
312.1	6.3654e-23
312.2	4.45578e-22
312.3	-3.81924e-22
312.4	3.1827e-22
312.5	1.90962e-22
312.6	6.3654e-23
312.7	1.90962e-22
312.8	1.27308e-22
312.9	2.54616e-22
313	1.27308e-22
313.1	7.00194e-22
313.2	3.81924e-22
313.3	0
313.4	1.27308e-22
313.5	4.45578e-22
313.6	6.3654e-23
313.7	5.09232e-22
313.8	-6.3654e-23
313.9	1.27308e-22
314	-3.81924e-22
314.1	5.09232e-22
314.2	3.81924e-22
314.3	5.09232e-22
314.4	1.90962e-22
314.5	3.81924e-22
314.6	4.45578e-22
314.7	-5.09232e-22
314.8	7.00194e-22
314.9	0
315	-6.3654e-23
315.1	4.45578e-22
315.2	3.1827e-22
315.3	0
315.4	2.54616e-22
315.5	-5.72886e-22
315.6	0
315.7	-6.3654e-22
315.8	-3.1827e-22
315.9	-3.1827e-22
316	0
316.1	-7.63848e-22
316.2	-1.27308e-22
316.3	6.3654e-22
316.4	-6.3654e-23
316.5	2.54616e-22
316.6	-6.3654e-23
316.7	-5.09232e-22
316.8	3.81924e-22
316.9	-6.3654e-23
317	-6.3654e-23
317.1	-1.90962e-22
317.2	2.54616e-22
317.3	3.1827e-22
317.4	5.09232e-22
317.5	1.27308e-22
317.6	6.3654e-23
317.7	-6.3654e-23
317.8	3.81924e-22
317.9	4.45578e-22
318	1.27308e-22
318.1	0
318.2	-1.90962e-22
318.3	5.09232e-22
318.4	6.3654e-23
318.5	3.1827e-22
318.6	-2.54616e-22
318.7	-1.27308e-22
318.8	-3.1827e-22
318.9	3.81924e-22
319	-3.1827e-22
319.1	-4.45578e-22
319.2	6.3654e-23
319.3	3.1827e-22
319.4	2.54616e-22
319.5	7.00194e-22
319.6	6.3654e-23
319.7	1.90962e-22
319.8	2.54616e-22
319.9	1.27308e-22
320	-2.54616e-22
320.1	-6.3654e-23
320.2	5.72886e-22
320.3	-1.27308e-22
320.4	3.81924e-22
320.5	7.63848e-22
320.6	9.5481e-22
320.7	2.54616e-22
320.8	7.00194e-22
320.9	0
321	-2.54616e-22
321.1	8.91156e-22
321.2	6.3654e-23
321.3	1.90962e-22
321.4	1.27308e-22
321.5	1.27308e-22
321.6	-1.90962e-22
321.7	8.27502e-22
321.8	3.1827e-22
321.9	-1.27308e-22
322	1.27308e-22
322.1	1.27308e-22
322.2	1.27308e-22
322.3	3.1827e-22
322.4	2.54616e-22
322.5	-3.1827e-22
322.6	3.81924e-22
322.7	1.27308e-22
322.8	3.81924e-22
322.9	1.90962e-22
323	4.45578e-22
323.1	-1.27308e-22
323.2	5.09232e-22
323.3	-6.3654e-23
323.4	-9.5481e-22
323.5	5.72886e-22
323.6	3.81924e-22
323.7	-3.1827e-22
323.8	-1.08212e-21
323.9	5.72886e-22
324	1.08212e-21
324.1	-1.20943e-21
324.2	0
324.3	8.27502e-22
324.4	1.90962e-22
324.5	-6.3654e-23
324.6	6.3654e-22
324.7	-2.54616e-22
324.8	5.09232e-22
324.9	1.01846e-21
325	2.54616e-22
325.1	3.81924e-22
325.2	-1.27308e-22
325.3	1.90962e-22
325.4	5.09232e-22
325.5	6.3654e-23
325.6	-6.3654e-22
325.7	7.63848e-22
325.8	6.3654e-22
325.9	4.45578e-22
326	-2.54616e-22
326.1	6.3654e-23
326.2	1.27308e-22
326.3	7.00194e-22
326.4	7.63848e-22
326.5	0
326.6	6.3654e-23
326.7	-1.27308e-22
326.8	5.09232e-22
326.9	0
327	1.90962e-22
327.1	-6.3654e-23
327.2	5.09232e-22
327.3	6.3654e-22
327.4	-1.90962e-22
327.5	5.72886e-22
327.6	3.81924e-22
327.7	-6.3654e-23
327.8	1.90962e-22
327.9	3.81924e-22
328	-1.90962e-22
328.1	0
328.2	-1.90962e-22
328.3	-1.90962e-22
328.4	-2.54616e-22
328.5	-3.81924e-22
328.6	-6.3654e-23
328.7	1.27308e-22
328.8	0
328.9	4.45578e-22
329	0
329.1	-6.3654e-23
329.2	1.90962e-22
329.3	7.00194e-22
329.4	2.54616e-22
329.5	3.81924e-22
329.6	3.81924e-22
329.7	-6.3654e-22
329.8	7.63848e-22
329.9	3.1827e-22
330	-3.1827e-22
330.1	-1.27308e-22
330.2	6.3654e-23
330.3	5.09232e-22
330.4	1.90962e-22
330.5	2.54616e-22
330.6	1.27308e-22
330.7	-6.3654e-23
330.8	1.90962e-22
330.9	2.54616e-22
331	5.09232e-22
331.1	0
331.2	-1.90962e-22
331.3	-1.27308e-22
331.4	1.27308e-22
331.5	6.3654e-23
331.6	3.81924e-22
331.7	-1.90962e-22
331.8	0
331.9	-3.1827e-22
332	4.45578e-22
332.1	1.90962e-22
332.2	-5.72886e-22
332.3	1.27308e-22
332.4	-2.54616e-22
332.5	-6.3654e-23
332.6	-7.63848e-22
332.7	9.5481e-22
332.8	-3.1827e-22
332.9	8.91156e-22
333	5.72886e-22
333.1	1.27308e-22
333.2	1.27308e-22
333.3	0
333.4	5.72886e-22
333.5	-5.09232e-22
333.6	7.00194e-22
333.7	-3.1827e-22
333.8	1.90962e-22
333.9	-1.90962e-22
334	-4.45578e-22
334.1	1.27308e-22
334.2	-6.3654e-23
334.3	1.01846e-21
334.4	7.63848e-22
334.5	9.5481e-22
334.6	7.63848e-22
334.7	1.27308e-22
334.8	2.54616e-22
334.9	3.1827e-22
335	-1.27308e-22
335.1	5.72886e-22
335.2	1.27308e-22
335.3	3.1827e-22
335.4	3.81924e-22
335.5	8.27502e-22
335.6	-3.1827e-22
335.7	3.1827e-22
335.8	-6.3654e-23
335.9	1.90962e-22
336	7.00194e-22
336.1	-5.09232e-22
336.2	1.90962e-22
336.3	1.27308e-22
336.4	-6.3654e-23
336.5	-6.3654e-23
336.6	0
336.7	-1.27308e-22
336.8	2.54616e-22
336.9	3.81924e-22
337	1.90962e-22
337.1	-6.3654e-23
337.2	3.1827e-22
337.3	2.54616e-22
337.4	6.3654e-23
337.5	3.1827e-22
337.6	3.81924e-22
337.7	-1.90962e-22
337.8	4.45578e-22
337.9	3.1827e-22
338	1.27308e-22
338.1	1.27308e-22
338.2	0
338.3	-6.3654e-23
338.4	3.1827e-22
338.5	6.3654e-23
338.6	-1.90962e-22
338.7	3.1827e-22
338.8	2.54616e-22
338.9	6.3654e-22
339	6.3654e-23
339.1	-1.90962e-22
339.2	-1.27308e-22
339.3	-3.1827e-22
339.4	2.54616e-22
339.5	1.90962e-22
339.6	7.00194e-22
339.7	6.3654e-23
339.8	3.81924e-22
339.9	3.81924e-22
340	-1.27308e-22
340.1	4.45578e-22
340.2	-2.54616e-22
340.3	-7.63848e-22
340.4	2.54616e-22
340.5	-6.3654e-23
340.6	0
340.7	5.09232e-22
340.8	1.27308e-22
340.9	5.09232e-22
341	2.54616e-22
341.1	1.90962e-22
341.2	4.45578e-22
341.3	-5.72886e-22
341.4	1.90962e-22
341.5	5.72886e-22
341.6	0
341.7	-1.27308e-22
341.8	5.72886e-22
341.9	1.27308e-22
342	1.01846e-21
342.1	-1.01846e-21
342.2	1.90962e-22
342.3	1.90962e-22
342.4	-6.3654e-23
342.5	1.27308e-22
342.6	8.91156e-22
342.7	3.1827e-22
342.8	7.00194e-22
342.9	1.27308e-22
343	3.1827e-22
343.1	-1.90962e-22
343.2	3.81924e-22
343.3	3.81924e-22
343.4	5.09232e-22
343.5	1.90962e-22
343.6	-1.90962e-22
343.7	-1.27308e-22
343.8	1.27308e-22
343.9	-2.54616e-22
344	-6.3654e-23
344.1	5.09232e-22
344.2	-2.54616e-22
344.3	3.1827e-22
344.4	-1.27308e-22
344.5	1.90962e-22
344.6	1.27308e-22
344.7	-1.27308e-22
344.8	4.45578e-22
344.9	1.90962e-22
345	1.27308e-22
345.1	1.27308e-22
345.2	1.27308e-22
345.3	1.27308e-22
345.4	5.09232e-22
345.5	-6.3654e-23
345.6	-3.1827e-22
345.7	6.3654e-23
345.8	6.3654e-22
345.9	3.81924e-22
346	5.09232e-22
346.1	0
346.2	-2.54616e-22
346.3	5.72886e-22
346.4	1.27308e-22
346.5	4.45578e-22
346.6	-3.1827e-22
346.7	3.81924e-22
346.8	-1.27308e-22
346.9	2.54616e-22
347	2.54616e-22
347.1	2.54616e-22
347.2	2.54616e-22
347.3	1.01846e-21
347.4	1.14577e-21
347.5	-2.54616e-22
347.6	3.1827e-22
347.7	1.90962e-22
347.8	1.27308e-22
347.9	3.81924e-22
348	3.1827e-22
348.1	-6.3654e-23
348.2	-6.3654e-23
348.3	-1.90962e-22
348.4	1.27308e-22
348.5	1.90962e-22
348.6	7.00194e-22
348.7	1.27308e-22
348.8	1.27308e-22
348.9	0
349	-6.3654e-23
349.1	6.3654e-23
349.2	1.90962e-22
349.3	2.54616e-22
349.4	-2.54616e-22
349.5	1.90962e-22
349.6	8.27502e-22
349.7	7.00194e-22
349.8	8.27502e-22
349.9	6.3654e-23
350	1.01846e-21
350.1	2.54616e-22
350.2	9.5481e-22
350.3	3.81924e-22
350.4	2.54616e-22
350.5	6.3654e-23
350.6	4.45578e-22
350.7	4.45578e-22
350.8	0
350.9	3.81924e-22
351	1.27308e-22
351.1	-3.1827e-22
351.2	-1.27308e-22
351.3	2.54616e-22
351.4	1.90962e-22
351.5	1.90962e-22
351.6	0
351.7	5.72886e-22
351.8	5.09232e-22
351.9	3.81924e-22
352	1.90962e-22
352.1	-6.3654e-23
352.2	2.54616e-22
352.3	2.54616e-22
352.4	-1.27308e-22
352.5	3.1827e-22
352.6	-3.1827e-22
352.7	3.1827e-22
352.8	4.45578e-22
352.9	1.27308e-22
353	-1.90962e-22
353.1	4.45578e-22
353.2	0
353.3	3.1827e-22
353.4	-6.3654e-23
353.5	8.91156e-22
353.6	1.27308e-22
353.7	4.45578e-22
353.8	5.72886e-22
353.9	1.27308e-22
354	1.90962e-22
354.1	5.09232e-22
354.2	3.1827e-22
354.3	3.81924e-22
354.4	1.27308e-22
354.5	6.3654e-22
354.6	1.90962e-22
354.7	3.1827e-22
354.8	4.45578e-22
354.9	-6.3654e-23
355	5.09232e-22
355.1	8.27502e-22
355.2	2.54616e-22
355.3	-3.1827e-22
355.4	3.1827e-22
355.5	2.54616e-22
355.6	5.09232e-22
355.7	6.3654e-22
355.8	0
355.9	3.81924e-22
356	6.3654e-22
356.1	2.54616e-22
356.2	1.27308e-22
356.3	5.09232e-22
356.4	-6.3654e-23
356.5	-6.3654e-23
356.6	1.90962e-22
356.7	4.45578e-22
356.8	4.45578e-22
356.9	5.09232e-22
357	6.3654e-22
357.1	5.72886e-22
357.2	3.81924e-22
357.3	6.3654e-23
357.4	3.81924e-22
357.5	3.1827e-22
357.6	8.27502e-22
357.7	3.1827e-22
357.8	3.1827e-22
357.9	7.63848e-22
358	7.00194e-22
358.1	5.09232e-22
358.2	0
358.3	7.00194e-22
358.4	3.81924e-22
358.5	1.90962e-22
358.6	-1.27308e-22
358.7	3.81924e-22
358.8	2.54616e-22
358.9	4.45578e-22
359	5.09232e-22
359.1	-4.45578e-22
359.2	1.90962e-22
359.3	3.1827e-22
359.4	7.00194e-22
359.5	5.72886e-22
359.6	5.72886e-22
359.7	1.27308e-22
359.8	6.3654e-23
359.9	5.72886e-22
360	-3.1827e-22
360.1	2.54616e-22
360.2	2.54616e-22
360.3	4.45578e-22
360.4	1.27308e-22
360.5	4.45578e-22
360.6	-1.90962e-22
360.7	3.81924e-22
360.8	1.90962e-22
360.9	2.54616e-22
361	3.1827e-22
361.1	2.54616e-22
361.2	1.90962e-22
361.3	0
361.4	6.3654e-22
361.5	5.09232e-22
361.6	-3.81924e-22
361.7	7.63848e-22
361.8	1.90962e-22
361.9	6.3654e-22
362	2.54616e-22
362.1	-6.3654e-23
362.2	0
362.3	4.45578e-22
362.4	7.00194e-22
362.5	1.90962e-22
362.6	1.90962e-22
362.7	-2.54616e-22
362.8	1.27308e-22
362.9	5.09232e-22
363	1.90962e-22
363.1	5.72886e-22
363.2	5.72886e-22
363.3	3.1827e-22
363.4	3.81924e-22
363.5	7.00194e-22
363.6	-4.45578e-22
363.7	2.54616e-22
363.8	4.45578e-22
363.9	3.81924e-22
364	3.81924e-22
364.1	-6.3654e-23
364.2	7.63848e-22
364.3	5.72886e-22
364.4	5.09232e-22
364.5	4.45578e-22
364.6	6.3654e-23
364.7	8.91156e-22
364.8	5.09232e-22
364.9	8.27502e-22
365	3.81924e-22
365.1	1.90962e-22
365.2	5.72886e-22
365.3	7.00194e-22
365.4	6.3654e-22
365.5	8.27502e-22
365.6	2.54616e-22
365.7	3.81924e-22
365.8	3.1827e-22
365.9	-6.3654e-23
366	5.72886e-22
366.1	1.90962e-22
366.2	-4.45578e-22
366.3	3.1827e-22
366.4	8.27502e-22
366.5	-6.3654e-23
366.6	5.72886e-22
366.7	5.09232e-22
366.8	-1.27308e-22
366.9	3.81924e-22
367	7.00194e-22
367.1	5.72886e-22
367.2	-6.3654e-23
367.3	8.27502e-22
367.4	3.1827e-22
367.5	9.5481e-22
367.6	3.1827e-22
367.7	4.45578e-22
367.8	9.5481e-22
367.9	6.3654e-23
368	3.81924e-22
368.1	1.27308e-22
368.2	0
368.3	-1.27308e-22
368.4	-2.54616e-22
368.5	0
368.6	2.54616e-22
368.7	5.09232e-22
368.8	5.09232e-22
368.9	7.63848e-22
369	7.00194e-22
369.1	6.3654e-22
369.2	5.09232e-22
369.3	8.27502e-22
369.4	1.90962e-22
369.5	-1.27308e-22
369.6	2.54616e-22
369.7	5.72886e-22
369.8	5.09232e-22
369.9	1.90962e-22
370	6.3654e-22
370.1	3.1827e-22
370.2	-3.81924e-22
370.3	3.1827e-22
370.4	6.3654e-23
370.5	-6.3654e-23
370.6	3.81924e-22
370.7	5.72886e-22
370.8	3.1827e-22
370.9	6.3654e-22
371	5.09232e-22
371.1	5.72886e-22
371.2	4.45578e-22
371.3	1.14577e-21
371.4	3.1827e-22
371.5	6.3654e-23
371.6	0
371.7	5.09232e-22
371.8	1.90962e-22
371.9	5.09232e-22
372	0
372.1	2.54616e-22
372.2	3.1827e-22
372.3	0
372.4	1.90962e-22
372.5	4.45578e-22
372.6	6.3654e-22
372.7	1.90962e-22
372.8	2.54616e-22
372.9	4.45578e-22
373	7.00194e-22
373.1	3.81924e-22
373.2	5.72886e-22
373.3	6.3654e-22
373.4	4.45578e-22
373.5	4.45578e-22
373.6	6.3654e-22
373.7	6.3654e-22
373.8	7.00194e-22
373.9	5.09232e-22
374	3.81924e-22
374.1	5.09232e-22
374.2	5.72886e-22
374.3	7.63848e-22
374.4	1.27308e-22
374.5	7.63848e-22
374.6	3.81924e-22
374.7	7.00194e-22
374.8	2.54616e-22
374.9	3.1827e-22
375	2.54616e-22
375.1	6.3654e-22
375.2	3.81924e-22
375.3	5.09232e-22
375.4	8.27502e-22
375.5	3.81924e-22
375.6	6.3654e-22
375.7	5.72886e-22
375.8	1.27308e-22
375.9	4.45578e-22
376	1.27308e-22
376.1	5.09232e-22
376.2	5.72886e-22
376.3	2.54616e-22
376.4	4.45578e-22
376.5	3.1827e-22
376.6	3.81924e-22
376.7	-6.3654e-23
376.8	5.09232e-22
376.9	1.01846e-21
377	5.72886e-22
377.1	7.00194e-22
377.2	3.1827e-22
377.3	4.45578e-22
377.4	3.81924e-22
377.5	3.81924e-22
377.6	6.3654e-22
377.7	3.1827e-22
377.8	4.45578e-22
377.9	6.3654e-22
378	4.45578e-22
378.1	7.00194e-22
378.2	8.91156e-22
378.3	5.09232e-22
378.4	3.81924e-22
378.5	3.81924e-22
378.6	3.81924e-22
378.7	5.09232e-22
378.8	5.09232e-22
378.9	7.63848e-22
379	2.54616e-22
379.1	4.45578e-22
379.2	7.00194e-22
379.3	7.63848e-22
379.4	4.45578e-22
379.5	1.90962e-22
379.6	6.3654e-23
379.7	6.3654e-23
379.8	8.27502e-22
379.9	9.5481e-22
380	7.63848e-22
380.1	3.81924e-22
380.2	7.63848e-22
380.3	3.1827e-22
380.4	4.45578e-22
380.5	7.63848e-22
380.6	3.81924e-22
380.7	3.81924e-22
380.8	5.09232e-22
380.9	6.3654e-22
381	5.72886e-22
381.1	6.3654e-22
381.2	4.45578e-22
381.3	6.3654e-22
381.4	4.45578e-22
381.5	5.72886e-22
381.6	4.45578e-22
381.7	4.45578e-22
381.8	6.3654e-23
381.9	3.81924e-22
382	4.45578e-22
382.1	3.1827e-22
382.2	3.81924e-22
382.3	5.09232e-22
382.4	5.72886e-22
382.5	8.27502e-22
382.6	2.54616e-22
382.7	5.72886e-22
382.8	4.45578e-22
382.9	5.09232e-22
383	5.72886e-22
383.1	6.3654e-22
383.2	7.63848e-22
383.3	1.90962e-22
383.4	5.72886e-22
383.5	5.09232e-22
383.6	1.27308e-22
383.7	7.00194e-22
383.8	4.45578e-22
383.9	5.09232e-22
384	3.81924e-22
384.1	3.81924e-22
384.2	6.3654e-22
384.3	1.90962e-22
384.4	1.90962e-22
384.5	5.09232e-22
384.6	1.90962e-22
384.7	7.63848e-22
384.8	5.09232e-22
384.9	5.09232e-22
385	6.3654e-22
385.1	7.63848e-22
385.2	7.63848e-22
385.3	5.09232e-22
385.4	8.91156e-22
385.5	5.72886e-22
385.6	8.27502e-22
385.7	3.81924e-22
385.8	6.3654e-22
385.9	8.27502e-22
386	3.1827e-22
386.1	5.72886e-22
386.2	4.45578e-22
386.3	5.72886e-22
386.4	1.27308e-22
386.5	3.81924e-22
386.6	3.81924e-22
386.7	3.1827e-22
386.8	5.72886e-22
386.9	4.45578e-22
387	4.45578e-22
387.1	8.91156e-22
387.2	3.81924e-22
387.3	5.09232e-22
387.4	5.09232e-22
387.5	1.90962e-22
387.6	7.00194e-22
387.7	7.63848e-22
387.8	3.1827e-22
387.9	6.3654e-22
388	3.81924e-22
388.1	3.81924e-22
388.2	7.00194e-22
388.3	1.90962e-22
388.4	7.00194e-22
388.5	1.90962e-22
388.6	3.81924e-22
388.7	2.54616e-22
388.8	3.1827e-22
388.9	8.91156e-22
389	7.00194e-22
389.1	6.3654e-22
389.2	5.09232e-22
389.3	6.3654e-22
389.4	7.63848e-22
389.5	6.3654e-22
389.6	6.3654e-22
389.7	5.09232e-22
389.8	3.1827e-22
389.9	3.1827e-22
390	5.09232e-22
390.1	5.72886e-22
390.2	9.5481e-22
390.3	6.3654e-22
390.4	5.09232e-22
390.5	1.90962e-22
390.6	5.09232e-22
390.7	7.00194e-22
390.8	5.09232e-22
390.9	5.72886e-22
391	3.1827e-22
391.1	5.72886e-22
391.2	6.3654e-22
391.3	5.72886e-22
391.4	4.45578e-22
391.5	4.45578e-22
391.6	4.45578e-22
391.7	8.27502e-22
391.8	1.90962e-22
391.9	8.91156e-22
392	6.3654e-23
392.1	3.81924e-22
392.2	6.3654e-22
392.3	3.81924e-22
392.4	4.45578e-22
392.5	7.63848e-22
392.6	3.81924e-22
392.7	4.45578e-22
392.8	6.3654e-22
392.9	5.09232e-22
393	8.27502e-22
393.1	8.27502e-22
393.2	6.3654e-22
393.3	7.63848e-22
393.4	4.45578e-22
393.5	5.72886e-22
393.6	5.72886e-22
393.7	5.72886e-22
393.8	5.09232e-22
393.9	3.1827e-22
394	4.45578e-22
394.1	7.00194e-22
394.2	7.00194e-22
394.3	7.63848e-22
394.4	7.00194e-22
394.5	5.72886e-22
394.6	4.45578e-22
394.7	5.09232e-22
394.8	5.72886e-22
394.9	7.00194e-22
395	7.00194e-22
395.1	2.54616e-22
395.2	8.91156e-22
395.3	4.45578e-22
395.4	5.72886e-22
395.5	5.72886e-22
395.6	5.09232e-22
395.7	7.00194e-22
395.8	1.14577e-21
395.9	7.00194e-22
396	3.1827e-22
396.1	8.27502e-22
396.2	5.72886e-22
396.3	1.90962e-22
396.4	3.81924e-22
396.5	7.63848e-22
396.6	5.09232e-22
396.7	7.00194e-22
396.8	7.63848e-22
396.9	6.3654e-22
397	3.1827e-22
397.1	3.1827e-22
397.2	2.54616e-22
397.3	7.00194e-22
397.4	9.5481e-22
397.5	9.5481e-22
397.6	3.1827e-22
397.7	6.3654e-22
397.8	7.63848e-22
397.9	6.3654e-22
398	1.90962e-22
398.1	6.3654e-22
398.2	4.45578e-22
398.3	5.09232e-22
398.4	5.09232e-22
398.5	1.27308e-22
398.6	5.72886e-22
398.7	3.81924e-22
398.8	7.00194e-22
398.9	1.27308e-22
399	5.09232e-22
399.1	4.45578e-22
399.2	9.5481e-22
399.3	5.09232e-22
399.4	4.45578e-22
399.5	5.72886e-22
399.6	2.54616e-22
399.7	7.63848e-22
399.8	5.09232e-22
399.9	7.63848e-22
400	7.00194e-22
